# Supplementary material for: Identification of a methyltransferase-related long noncoding RNA signature as a novel prognosis biomarker for lung adenocarcinoma
Source: publisher site journal article supplement (doi:10.18632/aging.205837), 2024-05-20
Supplement: Supplementary file [file aging-v16i10-205837-supplementary-material-SD4.pdf]

## SUPPLEMENTARY TABLES

**Supplementary Table 4. The mRNA-lncRNA network between the five methyltransferase-related genes and DElncRNAs.**

| mRNA                                 | lncRNA                              | cor          | p-value  |
|--------------------------------------|-------------------------------------|--------------|----------|
| ENSG00000106462 protein_coding EZH2  | ENSG00000268388 lncRNA FENDRR       | -0.30632682  | 1.11E-10 |
| ENSG00000162851 protein_coding TFB2M | ENSG00000268388 lncRNA FENDRR       | -0.398287677 | 1.99E-19 |
| ENSG00000182004 protein_coding SNRPE | ENSG00000268388 lncRNA FENDRR       | -0.410341825 | 8.42E-21 |
| ENSG00000278619 protein_coding MRM1  | ENSG00000268388 lncRNA FENDRR       | -0.35152291  | 1.31E-14 |
| ENSG00000162851 protein_coding TFB2M | ENSG00000238018 lncRNA AC093110.3   | -0.439446064 | 2.29E-24 |
| ENSG00000182004 protein_coding SNRPE | ENSG00000238018 lncRNA AC093110.3   | -0.454915104 | 2.09E-26 |
| ENSG00000278619 protein_coding MRM1  | ENSG00000238018 lncRNA AC093110.3   | -0.342945197 | 8.16E-14 |
| ENSG00000106462 protein_coding EZH2  | ENSG00000228401 lncRNA RP11-251M1.1 | -0.301387692 | 2.72E-10 |
| ENSG00000162851 protein_coding TFB2M | ENSG00000228401 lncRNA RP11-251M1.1 | -0.347354355 | 3.21E-14 |
| ENSG00000182004 protein_coding SNRPE | ENSG00000228401 lncRNA RP11-251M1.1 | -0.339178511 | 1.78E-13 |
| ENSG00000278619 protein_coding MRM1  | ENSG00000228401 lncRNA RP11-251M1.1 | -0.318974385 | 1.02E-11 |
| ENSG00000106462 protein_coding EZH2  | ENSG00000257894 lncRNA RP1-78O14.1  | -0.329857913 | 1.20E-12 |
| ENSG00000182004 protein_coding SNRPE | ENSG00000257894 lncRNA RP1-78O14.1  | -0.326869158 | 2.19E-12 |
| ENSG00000278619 protein_coding MRM1  | ENSG00000257894 lncRNA RP1-78O14.1  | -0.305690169 | 1.25E-10 |
| ENSG00000106462 protein_coding EZH2  | ENSG00000267107 lncRNA PCAT19       | -0.31904007  | 1.01E-11 |
| ENSG00000162851 protein_coding TFB2M | ENSG00000267107 lncRNA PCAT19       | -0.370937651 | 1.63E-16 |
| ENSG00000182004 protein_coding SNRPE | ENSG00000267107 lncRNA PCAT19       | -0.363586645 | 8.96E-16 |
| ENSG00000278619 protein_coding MRM1  | ENSG00000267107 lncRNA PCAT19       | -0.345486563 | 4.78E-14 |
| ENSG00000106462 protein_coding EZH2  | ENSG00000243961 lncRNA PARAL1       | -0.317282155 | 1.42E-11 |
| ENSG00000162851 protein_coding TFB2M | ENSG00000243961 lncRNA PARAL1       | -0.303503227 | 1.86E-10 |
| ENSG00000182004 protein_coding SNRPE | ENSG00000243961 lncRNA PARAL1       | -0.311264988 | 4.42E-11 |
| ENSG00000278619 protein_coding MRM1  | ENSG00000243961 lncRNA PARAL1       | -0.32632611  | 2.43E-12 |
| ENSG00000106462 protein_coding EZH2  | ENSG00000224397 lncRNA PELATON      | -0.311576011 | 4.18E-11 |
| ENSG00000162851 protein_coding TFB2M | ENSG00000224397 lncRNA PELATON      | -0.399089074 | 1.62E-19 |
| ENSG00000182004 protein_coding SNRPE | ENSG00000224397 lncRNA PELATON      | -0.413106073 | 4.00E-21 |
| ENSG00000278619 protein_coding MRM1  | ENSG00000224397 lncRNA PELATON      | -0.356601881 | 4.29E-15 |
| ENSG00000162851 protein_coding TFB2M | ENSG00000276850 lncRNA CH17-360D5.2 | -0.315518346 | 1.99E-11 |
| ENSG00000278619 protein_coding MRM1  | ENSG00000276850 lncRNA CH17-360D5.2 | -0.303817355 | 1.76E-10 |
| ENSG00000106462 protein_coding EZH2  | ENSG00000235997 lncRNA LINC01936    | -0.342983154 | 8.11E-14 |
| ENSG00000162851 protein_coding TFB2M | ENSG00000235997 lncRNA LINC01936    | -0.371864993 | 1.32E-16 |
| ENSG00000182004 protein_coding SNRPE | ENSG00000235997 lncRNA LINC01936    | -0.403529729 | 5.13E-20 |
| ENSG00000278619 protein_coding MRM1  | ENSG00000235997 lncRNA LINC01936    | -0.372102438 | 1.25E-16 |
| ENSG00000106462 protein_coding EZH2  | ENSG00000261269 lncRNA RP11-389C8.2 | -0.347474072 | 3.14E-14 |
| ENSG00000162851 protein_coding TFB2M | ENSG00000261269 lncRNA RP11-389C8.2 | -0.44316373  | 7.57E-25 |
| ENSG00000182004 protein_coding SNRPE | ENSG00000261269 lncRNA RP11-389C8.2 | -0.469694218 | 1.86E-28 |
| ENSG00000278619 protein_coding MRM1  | ENSG00000261269 lncRNA RP11-389C8.2 | -0.347832017 | 2.91E-14 |
| ENSG00000162851 protein_coding TFB2M | ENSG00000231993 lncRNA EP300-AS1    | -0.333237742 | 6.08E-13 |
| ENSG00000182004 protein_coding SNRPE | ENSG00000231993 lncRNA EP300-AS1    | -0.391796678 | 1.03E-18 |
| ENSG00000106462 protein_coding EZH2  | ENSG00000234456 lncRNA MAGI2-AS3    | -0.346987097 | 3.47E-14 |
| ENSG00000162851 protein_coding TFB2M | ENSG00000234456 lncRNA MAGI2-AS3    | -0.356327825 | 4.55E-15 |
| ENSG00000182004 protein_coding SNRPE | ENSG00000234456 lncRNA MAGI2-AS3    | -0.435490975 | 7.31E-24 |
| ENSG00000278619 protein_coding MRM1  | ENSG00000234456 lncRNA MAGI2-AS3    | -0.374763748 | 6.66E-17 |
| ENSG00000162851 protein_coding TFB2M | ENSG00000267280 lncRNA TBX2-AS1     | -0.326559974 | 2.32E-12 |

|                                      |                                      |              |          |
|--------------------------------------|--------------------------------------|--------------|----------|
| ENSG00000106462 protein_coding EZH2  | ENSG00000214708 lncRNA AC090616.2    | -0.362249996 | 1.21E-15 |
| ENSG00000106462 protein_coding EZH2  | ENSG00000186594 lncRNA MIR22HG       | -0.341161534 | 1.18E-13 |
| ENSG00000162851 protein_coding TFB2M | ENSG00000186594 lncRNA MIR22HG       | -0.303040006 | 2.02E-10 |
| ENSG00000182004 protein_coding SNRPE | ENSG00000186594 lncRNA MIR22HG       | -0.376061831 | 4.90E-17 |
| ENSG00000278619 protein_coding MRM1  | ENSG00000186594 lncRNA MIR22HG       | -0.344779073 | 5.54E-14 |
| ENSG00000106462 protein_coding EZH2  | ENSG00000255399 lncRNA TBX5-AS1      | -0.406271365 | 2.49E-20 |
| ENSG00000162851 protein_coding TFB2M | ENSG00000255399 lncRNA TBX5-AS1      | -0.395630987 | 3.92E-19 |
| ENSG00000182004 protein_coding SNRPE | ENSG00000255399 lncRNA TBX5-AS1      | -0.487013718 | 5.43E-31 |
| ENSG00000278619 protein_coding MRM1  | ENSG00000255399 lncRNA TBX5-AS1      | -0.391735627 | 1.05E-18 |
| ENSG00000182004 protein_coding SNRPE | ENSG00000228288 lncRNA PCAT6         | 0.336298437  | 3.24E-13 |
| ENSG00000278619 protein_coding MRM1  | ENSG00000228288 lncRNA PCAT6         | 0.390509979  | 1.42E-18 |
| ENSG00000106462 protein_coding EZH2  | ENSG00000227036 lncRNA LINC00511     | 0.361383405  | 1.47E-15 |
| ENSG00000106462 protein_coding EZH2  | ENSG00000255197 lncRNA RP11-750H9.5  | -0.302422331 | 2.25E-10 |
| ENSG00000162851 protein_coding TFB2M | ENSG00000255197 lncRNA RP11-750H9.5  | -0.453505748 | 3.23E-26 |
| ENSG00000182004 protein_coding SNRPE | ENSG00000255197 lncRNA RP11-750H9.5  | -0.531668814 | 3.08E-38 |
| ENSG00000278619 protein_coding MRM1  | ENSG00000255197 lncRNA RP11-750H9.5  | -0.384650018 | 6.10E-18 |
| ENSG00000278619 protein_coding MRM1  | ENSG00000249859 lncRNA PVT1          | 0.349424575  | 2.06E-14 |
| ENSG00000162851 protein_coding TFB2M | ENSG00000273837 lncRNA LLNLR-470E3.1 | -0.393563246 | 6.63E-19 |
| ENSG00000182004 protein_coding SNRPE | ENSG00000273837 lncRNA LLNLR-470E3.1 | -0.339760758 | 1.58E-13 |
| ENSG00000278619 protein_coding MRM1  | ENSG00000273837 lncRNA LLNLR-470E3.1 | -0.328104055 | 1.71E-12 |
| ENSG00000106462 protein_coding EZH2  | ENSG00000255717 lncRNA SNHG1         | 0.578794396  | 3.72E-47 |
| ENSG00000182004 protein_coding SNRPE | ENSG00000255717 lncRNA SNHG1         | 0.398378545  | 1.95E-19 |
| ENSG00000278619 protein_coding MRM1  | ENSG00000255717 lncRNA SNHG1         | 0.360887414  | 1.64E-15 |
| ENSG00000106462 protein_coding EZH2  | ENSG00000225383 lncRNA SFTA1P        | -0.401031022 | 9.83E-20 |
| ENSG00000106462 protein_coding EZH2  | ENSG00000280206 lncRNA CTB-193M12.5  | 0.354833938  | 6.33E-15 |
| ENSG00000106462 protein_coding EZH2  | ENSG00000261373 lncRNA VPS9D1-AS1    | 0.314591354  | 2.37E-11 |
| ENSG00000278619 protein_coding MRM1  | ENSG00000261373 lncRNA VPS9D1-AS1    | 0.362595128  | 1.12E-15 |
| ENSG00000278619 protein_coding MRM1  | ENSG00000243479 lncRNA MNX1-AS1      | 0.322368782  | 5.30E-12 |
| ENSG00000106462 protein_coding EZH2  | ENSG00000265415 lncRNA CTD-2510F5.4  | 0.612540563  | 1.72E-54 |
| ENSG00000182004 protein_coding SNRPE | ENSG00000265415 lncRNA CTD-2510F5.4  | 0.331806503  | 8.12E-13 |
| ENSG00000278619 protein_coding MRM1  | ENSG00000242125 lncRNA SNHG3         | 0.341799928  | 1.03E-13 |
| ENSG00000106462 protein_coding EZH2  | ENSG00000267751 lncRNA BSG-AS1       | 0.320670483  | 7.39E-12 |
| ENSG00000182004 protein_coding SNRPE | ENSG00000267751 lncRNA BSG-AS1       | 0.351302207  | 1.37E-14 |
| ENSG00000162851 protein_coding TFB2M | ENSG00000234614 lncRNA C2CD4D-AS1    | 0.341408017  | 1.12E-13 |
| ENSG00000106462 protein_coding EZH2  | ENSG00000232677 lncRNA LINC00665     | 0.34197833   | 9.99E-14 |
| ENSG00000182004 protein_coding SNRPE | ENSG00000232677 lncRNA LINC00665     | 0.31332984   | 3.00E-11 |
| ENSG00000278619 protein_coding MRM1  | ENSG00000249007 lncRNA RP11-510N19.5 | 0.325740707  | 2.72E-12 |

**Supplementary Table 5. The regression coefficient.**

| Gene                                | Coef         |
|-------------------------------------|--------------|
| ENSG00000228401 lncRNA RP11-251M1.1 | -0.081695395 |
| ENSG00000257894 lncRNA RP1-78O14.1  | -0.022561732 |
| ENSG00000235997 lncRNA LINC01936    | -0.071522442 |
| ENSG00000227036 lncRNA LINC00511    | 0.012186292  |
| ENSG00000255197 lncRNA RP11-750H9.5 | -0.10909988  |
| ENSG00000265415 lncRNA CTD-2510F5.4 | 0.105977347  |

**Supplementary Table 7. The lncRNA-miRNA-mRNA regulatory network.**

| <b>miRNA</b>    | <b>lncRNA</b> | <b>mRNA</b> |
|-----------------|---------------|-------------|
| hsa-let-7a-5p   | RP11-251M1.1  | TAF4        |
| hsa-let-7a-5p   | RP11-251M1.1  | TAF4        |
| hsa-let-7a-5p   | LINC01936     | TAF4        |
| hsa-let-7a-5p   | LINC01936     | TAF4        |
| hsa-let-7a-5p   | LINC00511     | TAF4        |
| hsa-let-7a-5p   | LINC00511     | TAF4        |
| hsa-let-7a-5p   | CTD-2510F5.4  | TAF4        |
| hsa-let-7a-5p   | CTD-2510F5.4  | TAF4        |
| hsa-let-7d-5p   | LINC01936     | PRMT1       |
| hsa-let-7d-5p   | RP11-750H9.5  | PRMT1       |
| hsa-let-7d-5p   | RP11-251M1.1  | PRMT1       |
| hsa-let-7d-5p   | CTD-2510F5.4  | PRMT1       |
| hsa-let-7d-5p   | LINC00511     | PRMT1       |
| hsa-miR-103a-3p | LINC01936     | PRPF31      |
| hsa-miR-103a-3p | LINC00511     | PRPF31      |
| hsa-miR-103a-3p | RP11-251M1.1  | PRPF31      |
| hsa-miR-146a-5p | RP11-251M1.1  | RBBP7       |
| hsa-miR-146a-5p | LINC00511     | RBBP7       |
| hsa-miR-155-5p  | LINC00511     | ERH         |
| hsa-miR-155-5p  | LINC00511     | CXXC1       |
| hsa-miR-21-5p   | LINC00511     | MRM3        |
| hsa-miR-21-5p   | LINC00511     | MCRS1       |
| hsa-miR-302a-3p | LINC00511     | JARID2      |
| hsa-miR-302a-3p | RP11-251M1.1  | JARID2      |
| hsa-miR-302a-3p | LINC01936     | JARID2      |
| hsa-miR-302a-5p | LINC00511     | METTL8      |
| hsa-miR-302a-5p | RP11-251M1.1  | METTL8      |
| hsa-miR-302a-5p | LINC01936     | METTL8      |
| hsa-miR-302b-3p | RP11-251M1.1  | METTL3      |
| hsa-miR-302b-3p | LINC00511     | METTL3      |
| hsa-miR-3198    | LINC01936     | CBX5        |
| hsa-miR-3198    | LINC01936     | CBX5        |
| hsa-miR-3198    | LINC00511     | CBX5        |
| hsa-miR-3198    | LINC00511     | CBX5        |
| hsa-miR-3198    | RP1-78O14.1   | CBX5        |
| hsa-miR-3198    | RP1-78O14.1   | CBX5        |
| hsa-miR-3198    | RP11-251M1.1  | CBX5        |
| hsa-miR-3198    | RP11-251M1.1  | CBX5        |
| hsa-miR-3654    | LINC00511     | CLNS1A      |
| hsa-miR-4426    | LINC01936     | WDR77       |
| hsa-miR-4426    | LINC01936     | RBBP5       |
| hsa-miR-4426    | RP11-251M1.1  | WDR77       |
| hsa-miR-4426    | RP11-251M1.1  | RBBP5       |
| hsa-miR-4426    | LINC00511     | WDR77       |
| hsa-miR-4426    | LINC00511     | RBBP5       |
| hsa-miR-4449    | RP11-750H9.5  | FTSJ1       |

|                 |              |        |
|-----------------|--------------|--------|
| hsa-miR-4449    | LINC00511    | FTSJ1  |
| hsa-miR-4449    | RP11-251M1.1 | FTSJ1  |
| hsa-miR-4709-3p | LINC01936    | RBM15B |
| hsa-miR-4709-3p | RP1-78O14.1  | RBM15B |
| hsa-miR-4709-3p | RP11-251M1.1 | RBM15B |
| hsa-miR-4709-3p | LINC00511    | RBM15B |
| hsa-miR-4724-3p | LINC00511    | CMTR1  |
| hsa-miR-492     | LINC00511    | TRMT44 |
| hsa-miR-492     | CTD-2510F5.4 | TRMT44 |
| hsa-miR-492     | LINC01936    | TRMT44 |
| hsa-miR-492     | RP11-251M1.1 | TRMT44 |
| hsa-miR-6747-3p | LINC00511    | DPY30  |
| hsa-miR-6747-3p | RP11-251M1.1 | DPY30  |
| hsa-miR-6747-3p | RP1-78O14.1  | DPY30  |
| hsa-miR-6747-3p | LINC01936    | DPY30  |
| hsa-miR-6798-3p | RP11-251M1.1 | RUVBL2 |
| hsa-miR-6798-3p | RP11-251M1.1 | RUVBL2 |
| hsa-miR-6798-3p | LINC01936    | RUVBL2 |
| hsa-miR-6798-3p | LINC01936    | RUVBL2 |
| hsa-miR-6798-3p | LINC00511    | RUVBL2 |
| hsa-miR-6798-3p | LINC00511    | RUVBL2 |
| hsa-miR-92a-3p  | RP11-251M1.1 | RBBP5  |
| hsa-miR-92a-3p  | LINC00511    | RBBP5  |
| hsa-miR-92a-3p  | LINC01936    | RBBP5  |

---
