# Supplementary material for: Identification of a methyltransferase-related long noncoding RNA signature as a novel prognosis biomarker for lung adenocarcinoma
Source: Aging (Albany NY). 2024 May 20;16(10):8747–71. doi: 10.18632/aging.205837 (PMC11164517; doi:10.18632/aging.205837)
Supplement: Supplementary Table 1 [file aging-16-205837-s001.xlsx]

## Sheet: TCGA_LUAD_FPKM_mRNA_diff
Supplementary Table 1. The DEGs results between normal and LUAD samples in TCGA-LUAD cohort.
	logFC	AveExpr	t	P.Value	adj.P.Val	B
ENSG00000150625|protein_coding|GPM6A	-2.78503	0.657389	-37.9528	5.2211e-155	7.90683e-151	343.573
ENSG00000108576|protein_coding|SLC6A4	-3.868	0.736733	-35.5555	5.15948e-144	3.90676e-140	318.398
ENSG00000158764|protein_coding|ITLN2	-3.8179	0.929663	-32.8594	2.72272e-131	1.37443e-127	289.251
ENSG00000182010|protein_coding|RTKN2	-3.47849	1.62411	-31.5425	6.01649e-125	2.27784e-121	274.712
ENSG00000168481|protein_coding|LGI3	-3.64362	1.02835	-30.0152	1.71614e-117	5.19783e-114	257.622
ENSG00000168309|protein_coding|FAM107A	-3.87625	1.74474	-29.8242	1.49216e-116	3.76621e-113	255.469
ENSG00000263155|protein_coding|MYZAP	-2.19122	0.996797	-29.5849	2.25094e-115	4.26103e-112	252.767
ENSG00000167434|protein_coding|CA4	-3.31942	1.05511	-29.5149	4.98824e-115	8.39355e-112	251.974
ENSG00000170323|protein_coding|FABP4	-4.92258	2.0528	-29.0214	1.37133e-112	2.07674e-109	246.382
ENSG00000176771|protein_coding|NCKAP5	-2.27466	0.791524	-28.1123	4.51047e-108	5.25435e-105	236.024
ENSG00000120156|protein_coding|TEK	-2.74263	1.84566	-28.0893	5.87753e-108	6.35781e-105	235.761
ENSG00000135604|protein_coding|STX11	-2.72726	2.33203	-27.8869	6.00824e-107	6.06592e-104	233.445
ENSG00000168952|protein_coding|STXBP6	-2.16032	0.819882	-27.6175	1.33246e-105	1.26118e-102	230.359
ENSG00000136160|protein_coding|EDNRB	-3.17469	2.14596	-27.0349	1.10339e-102	9.82923e-100	223.667
ENSG00000167588|protein_coding|GPD1	-3.06858	1.25182	-27.0023	1.60761e-102	1.35254e-99	223.292
ENSG00000183010|protein_coding|PYCR1	3.3048	4.88992	26.4225	1.319e-99	1.05131e-96	216.609
ENSG00000186994|protein_coding|KANK3	-2.03378	1.33965	-26.2468	1.01174e-98	7.6609e-96	214.58
ENSG00000169252|protein_coding|ADRB2	-2.46739	1.49004	-26.0893	6.28932e-98	4.5355e-95	212.76
ENSG00000072163|protein_coding|LIMS2	-2.21646	1.71301	-25.917	4.65287e-97	3.20286e-94	210.766
ENSG00000277494|protein_coding|GPIHBP1	-3.16346	1.46521	-25.7838	2.1861e-96	1.4394e-93	209.225
ENSG00000134917|protein_coding|ADAMTS8	-2.70807	1.15113	-25.6653	8.67356e-96	5.2541e-93	207.853
ENSG00000154721|protein_coding|JAM2	-1.97664	1.64177	-25.5829	2.26079e-95	1.31682e-92	206.898
ENSG00000132622|protein_coding|HSPA12B	-2.1063	1.68037	-25.4901	6.65106e-95	3.73051e-92	205.823
ENSG00000148677|protein_coding|ANKRD1	-3.76958	1.31951	-25.408	1.72966e-94	9.355e-92	204.871
ENSG00000169744|protein_coding|LDB2	-2.19693	2.06745	-25.3186	4.89448e-94	2.55593e-91	203.835
ENSG00000165312|protein_coding|OTUD1	-1.82789	2.9744	-25.2839	7.33269e-94	3.70154e-91	203.433
ENSG00000243566|protein_coding|UPK3B	-4.36017	1.89259	-25.2719	8.43097e-94	4.11867e-91	203.294
ENSG00000115361|protein_coding|ACADL	-2.1921	0.909402	-25.2549	1.02794e-93	4.86474e-91	203.096
ENSG00000105227|protein_coding|PRX	-2.68349	1.79512	-25.0407	1.24579e-92	5.71703e-90	200.611
ENSG00000070778|protein_coding|PTPN21	-2.00354	1.96225	-25.0222	1.54566e-92	6.88457e-90	200.396
ENSG00000163815|protein_coding|CLEC3B	-3.86809	3.07343	-24.8755	8.54397e-92	3.49702e-89	198.693
ENSG00000010319|protein_coding|SEMA3G	-2.29117	1.59329	-24.8632	9.86432e-92	3.93119e-89	198.55
ENSG00000150048|protein_coding|CLEC1A	-1.42501	1.03578	-24.8525	1.11791e-91	4.34094e-89	198.425
ENSG00000139567|protein_coding|ACVRL1	-2.3035	3.02429	-24.6615	1.0363e-90	3.92344e-88	196.207
ENSG00000166292|protein_coding|TMEM100	-3.85691	1.83714	-24.5786	2.72493e-90	1.0065e-87	195.244
ENSG00000022267|protein_coding|FHL1	-3.47185	2.69269	-24.4801	8.60171e-90	3.10153e-87	194.099
ENSG00000170989|protein_coding|S1PR1	-2.64986	3.19641	-24.4487	1.24047e-89	4.36876e-87	193.734
ENSG00000154133|protein_coding|ROBO4	-2.37616	2.1145	-24.4219	1.69578e-89	5.83656e-87	193.423
ENSG00000151718|protein_coding|WWC2	-2.00453	2.20822	-24.348	4.01907e-89	1.35255e-86	192.563
ENSG00000204305|protein_coding|AGER	-6.21794	4.43119	-24.2199	1.79313e-88	5.90331e-86	191.073
ENSG00000118526|protein_coding|TCF21	-2.49428	1.30512	-24.1527	3.93117e-88	1.26667e-85	190.291
ENSG00000112782|protein_coding|CLIC5	-3.68597	2.18509	-24.1019	7.11056e-88	2.24338e-85	189.701
ENSG00000165810|protein_coding|BTNL9	-2.5219	1.15583	-24.0923	7.9579e-88	2.45948e-85	189.589
ENSG00000249751|protein_coding|ECSCR	-1.92247	2.03129	-24.0708	1.0227e-87	3.09756e-85	189.339
ENSG00000131477|protein_coding|RAMP2	-2.71229	3.73842	-24.0594	1.16768e-87	3.46732e-85	189.207
ENSG00000101331|protein_coding|CCM2L	-1.68515	1.17744	-23.9338	5.06561e-87	1.47526e-84	187.745
ENSG00000112214|protein_coding|FHL5	-1.95611	1.11579	-23.9306	5.25922e-87	1.50275e-84	187.708
ENSG00000133800|protein_coding|LYVE1	-2.6308	1.6652	-23.872	1.04193e-86	2.92203e-84	187.027
ENSG00000102760|protein_coding|RGCC	-2.85496	5.54109	-23.6877	8.97228e-86	2.47048e-83	184.882
ENSG00000261371|protein_coding|PECAM1	-2.24861	4.75456	-23.6077	2.28425e-85	6.17727e-83	183.951
ENSG00000141338|protein_coding|ABCA8	-1.94046	0.90944	-23.514	6.82749e-85	1.81396e-82	182.86
ENSG00000101307|protein_coding|SIRPB1	-1.79287	0.978695	-23.5072	7.38862e-85	1.9292e-82	182.782
ENSG00000116016|protein_coding|EPAS1	-2.59758	5.83893	-23.4183	2.08828e-84	5.36017e-82	181.747
ENSG00000103241|protein_coding|FOXF1	-2.1971	1.84491	-23.3427	5.05228e-84	1.2752e-81	180.866
ENSG00000134256|protein_coding|CD101	-1.70737	1.16044	-23.1475	4.94444e-83	1.22752e-80	178.594
ENSG00000133121|protein_coding|STARD13	-1.48313	1.49831	-23.1175	7.01755e-83	1.68688e-80	178.245
ENSG00000142748|protein_coding|FCN3	-4.04255	2.38294	-23.0456	1.6256e-82	3.84658e-80	177.408
ENSG00000122679|protein_coding|RAMP3	-2.8886	3.44598	-23.0387	1.76139e-82	4.10376e-80	177.329
ENSG00000213853|protein_coding|EMP2	-2.76936	4.95368	-23.0211	2.16489e-82	4.96744e-80	177.123
ENSG00000114790|protein_coding|ARHGEF26	-2.32876	2.04933	-22.953	4.79759e-82	1.0844e-79	176.33
ENSG00000183019|protein_coding|MCEMP1	-4.13307	2.35726	-22.9438	5.34039e-82	1.18934e-79	176.224
ENSG00000165197|protein_coding|VEGFD	-3.34655	1.57341	-22.8865	1.04296e-81	2.28908e-79	175.557
ENSG00000128268|protein_coding|MGAT3	-2.59249	1.36375	-22.8632	1.37011e-81	2.92239e-79	175.285
ENSG00000094963|protein_coding|FMO2	-3.14782	2.61675	-22.7661	4.25785e-81	8.95567e-79	174.155
ENSG00000116194|protein_coding|ANGPTL1	-1.55228	0.812429	-22.7525	4.99179e-81	1.03556e-78	173.997
ENSG00000107742|protein_coding|SPOCK2	-3.24835	3.63494	-22.7276	6.67332e-81	1.36569e-78	173.708
ENSG00000105974|protein_coding|CAV1	-3.89277	4.89896	-22.7245	6.91969e-81	1.39722e-78	173.672
ENSG00000266524|protein_coding|GDF10	-2.59733	1.19381	-22.6988	9.34873e-81	1.86286e-78	173.372
ENSG00000198873|protein_coding|GRK5	-2.15753	2.1201	-22.6303	2.07951e-80	4.08988e-78	172.576
ENSG00000177098|protein_coding|SCN4B	-1.96274	1.1472	-22.602	2.89575e-80	5.62222e-78	172.246
ENSG00000164035|protein_coding|EMCN	-2.29593	1.8317	-22.5631	4.56138e-80	8.744e-78	171.793
ENSG00000154783|protein_coding|FGD5	-1.84301	1.96094	-22.486	1.12254e-79	2.12498e-77	170.896
ENSG00000114854|protein_coding|TNNC1	-3.63331	2.67337	-22.4769	1.2476e-79	2.33255e-77	170.791
ENSG00000171132|protein_coding|PRKCE	-1.33938	1.5756	-22.4695	1.36054e-79	2.51269e-77	170.704
ENSG00000227051|protein_coding|C14orf132	-2.19028	1.63905	-22.4652	1.43073e-79	2.61047e-77	170.654
ENSG00000135917|protein_coding|SLC19A3	-1.84463	0.860714	-22.3942	3.27633e-79	5.90675e-77	169.829
ENSG00000064989|protein_coding|CALCRL	-2.50997	2.68548	-22.3882	3.51424e-79	6.26114e-77	169.759
ENSG00000179776|protein_coding|CDH5	-2.36116	3.20352	-22.288	1.13261e-78	1.99445e-76	168.593
ENSG00000189129|protein_coding|PLAC9	-2.25942	2.16727	-22.2678	1.43314e-78	2.49465e-76	168.359
ENSG00000120913|protein_coding|PDLIM2	-1.44338	1.61452	-22.2633	1.51116e-78	2.60057e-76	168.306
ENSG00000137441|protein_coding|FGFBP2	-1.84633	0.658309	-22.1614	4.96196e-78	8.44314e-76	167.122
ENSG00000120279|protein_coding|MYCT1	-1.83718	1.9555	-22.1381	6.51225e-78	1.0958e-75	166.851
ENSG00000198844|protein_coding|ARHGEF15	-1.86187	1.66537	-22.1194	8.10283e-78	1.34845e-75	166.633
ENSG00000092421|protein_coding|SEMA6A	-1.57679	0.92851	-22.1153	8.4998e-78	1.39914e-75	166.586
ENSG00000114654|protein_coding|EFCC1	-1.90301	1.38881	-22.0641	1.54584e-77	2.51722e-75	165.99
ENSG00000095370|protein_coding|SH2D3C	-1.91804	2.38752	-21.9924	3.5652e-77	5.74376e-75	165.157
ENSG00000171056|protein_coding|SOX7	-2.06399	1.36153	-21.9753	4.35306e-77	6.93923e-75	164.958
ENSG00000069702|protein_coding|TGFBR3	-2.11061	1.54509	-21.9603	5.18923e-77	8.186e-75	164.783
ENSG00000168497|protein_coding|CAVIN2	-3.44453	3.70419	-21.8755	1.39425e-76	2.17675e-74	163.799
ENSG00000127329|protein_coding|PTPRB	-2.19096	1.96578	-21.8704	1.47965e-76	2.28652e-74	163.74
ENSG00000166265|protein_coding|CYYR1	-1.92214	2.33481	-21.7935	3.62818e-76	5.55002e-74	162.846
ENSG00000158246|protein_coding|TENT5B	-2.4103	1.83111	-21.7119	9.40052e-76	1.42361e-73	161.898
ENSG00000112137|protein_coding|PHACTR1	-1.71906	1.2984	-21.7005	1.07357e-75	1.60971e-73	161.765
ENSG00000135218|protein_coding|CD36	-2.78288	1.79113	-21.6658	1.6076e-75	2.38682e-73	161.363
ENSG00000059573|protein_coding|ALDH18A1	1.57439	4.74948	21.6333	2.34804e-75	3.4523e-73	160.986
ENSG00000130052|protein_coding|STARD8	-1.63484	1.6874	-21.6233	2.6392e-75	3.84308e-73	160.869
ENSG00000171115|protein_coding|GIMAP8	-2.17209	2.37574	-21.5915	3.82449e-75	5.516e-73	160.5
ENSG00000136114|protein_coding|THSD1	-1.49583	1.29863	-21.4047	3.37044e-74	4.77028e-72	158.332
ENSG00000091106|protein_coding|NLRC4	-1.39945	1.22156	-21.3773	4.63625e-74	6.50106e-72	158.014
ENSG00000171243|protein_coding|SOSTDC1	-2.81412	1.00521	-21.3492	6.43271e-74	8.93733e-72	157.688
ENSG00000129596|protein_coding|CDO1	-1.73972	0.960284	-21.3387	7.2639e-74	1.00004e-71	157.567
ENSG00000131097|protein_coding|HIGD1B	-2.37734	2.0703	-21.328	8.23198e-74	1.12311e-71	157.442
ENSG00000152580|protein_coding|IGSF10	-1.66743	0.727552	-21.3207	8.95997e-74	1.21152e-71	157.358
ENSG00000171049|protein_coding|FPR2	-1.80511	0.883139	-21.2613	1.78838e-73	2.39674e-71	156.67
ENSG00000159723|protein_coding|AGRP	-1.69823	0.777324	-21.2547	1.93161e-73	2.56599e-71	156.593
ENSG00000105538|protein_coding|RASIP1	-1.88067	1.92046	-21.2131	3.13347e-73	4.12638e-71	156.111
ENSG00000149557|protein_coding|FEZ1	-1.4108	1.22893	-21.2103	3.23813e-73	4.22744e-71	156.078
ENSG00000157554|protein_coding|ERG	-1.65037	1.74093	-21.1667	5.37727e-73	6.90113e-71	155.573
ENSG00000114812|protein_coding|VIPR1	-2.49569	1.73102	-21.1438	7.02257e-73	8.93696e-71	155.307
ENSG00000241644|protein_coding|INMT	-3.66851	2.95436	-21.0373	2.42128e-72	3.05566e-70	154.074
ENSG00000135063|protein_coding|FAM189A2	-2.65735	2.00846	-21.0351	2.48511e-72	3.11029e-70	154.048
ENSG00000206384|protein_coding|COL6A6	-1.85901	0.916908	-20.9181	9.68244e-72	1.20189e-69	152.694
ENSG00000164736|protein_coding|SOX17	-1.66447	1.0834	-20.9135	1.02082e-71	1.25686e-69	152.641
ENSG00000169418|protein_coding|NPR1	-2.34456	1.89277	-20.8975	1.2296e-71	1.5017e-69	152.455
ENSG00000173457|protein_coding|PPP1R14B	2.05427	5.56137	20.7485	6.94116e-71	8.40935e-69	150.731
ENSG00000043591|protein_coding|ADRB1	-2.39932	1.20767	-20.7086	1.10333e-70	1.3261e-68	150.27
ENSG00000188536|protein_coding|HBA2	-4.12745	2.91131	-20.6282	2.80383e-70	3.3434e-68	149.341
ENSG00000197245|protein_coding|FAM110D	-1.35301	0.989945	-20.5985	3.95922e-70	4.68425e-68	148.997
ENSG00000159708|protein_coding|LRRC36	-2.14067	0.925305	-20.5913	4.30132e-70	5.04956e-68	148.915
ENSG00000144120|protein_coding|TMEM177	1.19968	2.32475	20.4675	1.80819e-69	2.1064e-67	147.484
ENSG00000137834|protein_coding|SMAD6	-1.66539	1.42397	-20.4544	2.10445e-69	2.43281e-67	147.333
ENSG00000138821|protein_coding|SLC39A8	-2.61763	4.2702	-20.3867	4.61216e-69	5.2914e-67	146.551
ENSG00000276644|protein_coding|DACH1	-1.5353	0.832938	-20.3304	8.85422e-69	1.00818e-66	145.902
ENSG00000135052|protein_coding|GOLM1	2.44702	5.72964	20.2774	1.63501e-68	1.8478e-66	145.291
ENSG00000011201|protein_coding|ANOS1	-2.68375	2.4828	-20.2105	3.54926e-68	3.98148e-66	144.519
ENSG00000163687|protein_coding|DNASE1L3	-2.03122	0.895134	-20.0686	1.83045e-67	2.02338e-65	142.885
ENSG00000133116|protein_coding|KL	-1.53882	0.783576	-20.0068	3.7392e-67	4.10336e-65	142.173
ENSG00000066405|protein_coding|CLDN18	-5.65252	2.99618	-19.9969	4.1956e-67	4.57109e-65	142.059
ENSG00000176435|protein_coding|CLEC14A	-2.14305	3.58606	-19.983	4.9218e-67	5.32398e-65	141.9
ENSG00000145147|protein_coding|SLIT2	-2.03842	1.83819	-19.978	5.2187e-67	5.6051e-65	141.841
ENSG00000243364|protein_coding|EFNA4	1.93279	3.81047	19.8357	2.69796e-66	2.87731e-64	140.205
ENSG00000143167|protein_coding|GPA33	-1.95206	0.763929	-19.8302	2.87475e-66	3.04442e-64	140.142
ENSG00000186417|protein_coding|GLDN	-1.56495	0.950538	-19.7921	4.4606e-66	4.69107e-64	139.704
ENSG00000112902|protein_coding|SEMA5A	-2.09962	1.5564	-19.7415	8.00277e-66	8.35821e-64	139.122
ENSG00000161835|protein_coding|TAMALIN	-1.91705	2.1117	-19.6702	1.81904e-65	1.88682e-63	138.304
ENSG00000167261|protein_coding|DPEP2	-1.64241	1.42506	-19.664	1.95519e-65	2.01424e-63	138.232
ENSG00000135363|protein_coding|LMO2	-1.60237	2.31851	-19.6116	3.57542e-65	3.65853e-63	137.631
ENSG00000173269|protein_coding|MMRN2	-1.81223	2.48712	-19.5724	5.61175e-65	5.70365e-63	137.182
ENSG00000180198|protein_coding|RCC1	1.58088	3.95128	19.5244	9.75959e-65	9.85328e-63	136.631
ENSG00000031081|protein_coding|ARHGAP31	-1.95244	2.40552	-19.4673	1.88245e-64	1.88794e-62	135.977
ENSG00000121691|protein_coding|CAT	-1.89268	4.95098	-19.384	4.90559e-64	4.88752e-62	135.023
ENSG00000164161|protein_coding|HHIP	-2.46462	1.07959	-19.2828	1.56866e-63	1.55267e-61	133.865
ENSG00000197415|protein_coding|VEPH1	-2.43153	1.6338	-19.2153	3.40755e-63	3.32928e-61	133.093
ENSG00000168907|protein_coding|PLA2G4F	-2.46689	1.67758	-19.193	4.40027e-63	4.27165e-61	132.838
ENSG00000184113|protein_coding|CLDN5	-2.57838	2.96357	-19.1109	1.12869e-62	1.08183e-60	131.9
ENSG00000239672|protein_coding|NME1	1.9744	3.93355	19.0974	1.31717e-62	1.24671e-60	131.746
ENSG00000174837|protein_coding|ADGRE1	-1.50105	0.76671	-19.0911	1.41589e-62	1.33182e-60	131.674
ENSG00000096063|protein_coding|SRPK1	1.41845	3.67322	19.0765	1.67343e-62	1.56435e-60	131.508
ENSG00000126785|protein_coding|RHOJ	-1.50791	2.01287	-19.0591	2.04398e-62	1.89902e-60	131.308
ENSG00000196549|protein_coding|MME	-2.28343	1.39737	-19.0209	3.1663e-62	2.92381e-60	130.872
ENSG00000077152|protein_coding|UBE2T	2.58105	3.70362	19.0203	3.18707e-62	2.92515e-60	130.866
ENSG00000128050|protein_coding|PAICS	1.65551	3.95599	18.9755	5.32444e-62	4.85743e-60	130.355
ENSG00000164764|protein_coding|SBSPON	-1.62169	0.898332	-18.9171	1.03881e-61	9.36417e-60	129.689
ENSG00000131831|protein_coding|RAI2	-1.91887	2.28687	-18.905	1.19257e-61	1.06866e-59	129.552
ENSG00000154175|protein_coding|ABI3BP	-2.19704	1.82806	-18.8603	1.98944e-61	1.77224e-59	129.042
ENSG00000131471|protein_coding|AOC3	-2.66694	3.61729	-18.8406	2.49375e-61	2.2085e-59	128.817
ENSG00000155011|protein_coding|DKK2	-1.41065	1.01626	-18.8216	3.09647e-61	2.72634e-59	128.602
ENSG00000107242|protein_coding|PIP5K1B	-1.87512	1.42945	-18.747	7.26587e-61	6.36037e-59	127.752
ENSG00000213203|protein_coding|GIMAP1	-1.42689	1.46137	-18.7038	1.18981e-60	1.03554e-58	127.261
ENSG00000178726|protein_coding|THBD	-2.38956	3.4345	-18.6855	1.46639e-60	1.26897e-58	127.053
ENSG00000111961|protein_coding|SASH1	-1.5357	2.2482	-18.6827	1.51406e-60	1.30278e-58	127.021
ENSG00000165072|protein_coding|MAMDC2	-2.47141	1.77673	-18.6004	3.87225e-60	3.31307e-58	126.086
ENSG00000144843|protein_coding|ADPRH	-1.31707	2.20907	-18.5822	4.76439e-60	4.05348e-58	125.879
ENSG00000138363|protein_coding|ATIC	1.22731	4.58296	18.5752	5.15932e-60	4.36496e-58	125.8
ENSG00000106034|protein_coding|CPED1	-1.49912	1.28212	-18.5729	5.29649e-60	4.45612e-58	125.774
ENSG00000173517|protein_coding|PEAK1	-1.21063	1.614	-18.538	7.88582e-60	6.59795e-58	125.378
ENSG00000137507|protein_coding|LRRC32	-1.9964	3.15255	-18.5271	8.92551e-60	7.42681e-58	125.254
ENSG00000144655|protein_coding|CSRNP1	-2.09046	4.07434	-18.5182	9.87515e-60	8.12768e-58	125.154
ENSG00000198075|protein_coding|SULT1C4	-1.35309	0.863551	-18.4878	1.39631e-59	1.14301e-57	124.809
ENSG00000128849|protein_coding|CGNL1	-2.03718	2.46027	-18.4807	1.51338e-59	1.23219e-57	124.728
ENSG00000099260|protein_coding|PALMD	-1.47863	1.34763	-18.4568	1.98648e-59	1.60017e-57	124.458
ENSG00000196616|protein_coding|ADH1B	-3.7481	2.58169	-18.4524	2.08848e-59	1.67344e-57	124.408
ENSG00000274736|protein_coding|CCL23	-1.9251	1.32471	-18.4284	2.74487e-59	2.1878e-57	124.136
ENSG00000187800|protein_coding|PEAR1	-1.35002	1.25127	-18.4249	2.85709e-59	2.26533e-57	124.096
ENSG00000126759|protein_coding|CFP	-1.20376	0.909996	-18.3851	4.49273e-59	3.54364e-57	123.645
ENSG00000164466|protein_coding|SFXN1	1.20744	2.72804	18.322	9.21005e-59	7.18954e-57	122.93
ENSG00000158435|protein_coding|CNOT11	1.13646	4.75401	18.3212	9.28687e-59	7.21233e-57	122.922
ENSG00000183807|protein_coding|FAM162B	-1.80664	1.67363	-18.3163	9.82862e-59	7.59412e-57	122.865
ENSG00000133561|protein_coding|GIMAP6	-1.9249	2.80092	-18.2931	1.27865e-58	9.82935e-57	122.603
ENSG00000103647|protein_coding|CORO2B	-1.29059	0.906489	-18.2921	1.293e-58	9.88945e-57	122.592
ENSG00000184905|protein_coding|TCEAL2	-1.63579	0.692702	-18.2766	1.54274e-58	1.17403e-56	122.416
ENSG00000105339|protein_coding|DENND3	-1.42847	2.1064	-18.2547	1.97842e-58	1.49806e-56	122.169
ENSG00000244734|protein_coding|HBB	-4.57154	4.43916	-18.2537	1.99978e-58	1.5067e-56	122.158
ENSG00000125810|protein_coding|CD93	-2.13572	3.8427	-18.1723	5.03925e-58	3.77794e-56	121.238
ENSG00000167874|protein_coding|TMEM88	-1.66907	1.80292	-18.0835	1.37809e-57	1.02303e-55	120.236
ENSG00000155660|protein_coding|PDIA4	1.73694	6.93989	18.0708	1.59185e-57	1.17595e-55	120.092
ENSG00000080618|protein_coding|CPB2	-3.24715	1.47115	-18.0151	2.99032e-57	2.19832e-55	119.465
ENSG00000175084|protein_coding|DES	-3.04035	2.2488	-18.0116	3.11177e-57	2.27655e-55	119.425
ENSG00000164530|protein_coding|PI16	-1.65793	0.615349	-18.0108	3.13895e-57	2.2854e-55	119.416
ENSG00000066056|protein_coding|TIE1	-1.67878	2.35386	-17.9974	3.6563e-57	2.64933e-55	119.264
ENSG00000141934|protein_coding|PLPP2	2.14234	3.40156	17.9874	4.0928e-57	2.95149e-55	119.152
ENSG00000122694|protein_coding|GLIPR2	-2.1148	3.67262	-17.9741	4.7555e-57	3.41314e-55	119.003
ENSG00000154188|protein_coding|ANGPT1	-1.7782	1.3867	-17.9698	4.99255e-57	3.56638e-55	118.954
ENSG00000145247|protein_coding|OCIAD2	1.98434	5.15005	17.953	6.03787e-57	4.29284e-55	118.765
ENSG00000035141|protein_coding|FAM136A	1.14311	3.93697	17.9416	6.8678e-57	4.86009e-55	118.637
ENSG00000174175|protein_coding|SELP	-1.85142	1.70803	-17.9157	9.21028e-57	6.48746e-55	118.344
ENSG00000079462|protein_coding|PAFAH1B3	2.00094	4.40624	17.9054	1.03456e-56	7.25342e-55	118.229
ENSG00000135111|protein_coding|TBX3	-1.60701	1.54204	-17.8848	1.30566e-56	9.11195e-55	117.997
ENSG00000175832|protein_coding|ETV4	2.68276	3.30239	17.864	1.65214e-56	1.1477e-54	117.763
ENSG00000133401|protein_coding|PDZD2	-1.79293	1.39604	-17.8582	1.76348e-56	1.21946e-54	117.698
ENSG00000113070|protein_coding|HBEGF	-2.37708	3.21646	-17.8501	1.93111e-56	1.32931e-54	117.607
ENSG00000197471|protein_coding|SPN	-1.9652	2.14242	-17.8493	1.94963e-56	1.33598e-54	117.598
ENSG00000197256|protein_coding|KANK2	-1.46982	3.68479	-17.8424	2.10827e-56	1.43818e-54	117.52
ENSG00000168477|protein_coding|TNXB	-2.10384	1.32929	-17.8067	3.15243e-56	2.14027e-54	117.119
ENSG00000177469|protein_coding|CAVIN1	-2.08845	5.69758	-17.8064	3.16574e-56	2.14027e-54	117.115
ENSG00000179913|protein_coding|B3GNT3	3.1023	3.63971	17.7712	4.70536e-56	3.16702e-54	116.721
ENSG00000105971|protein_coding|CAV2	-2.51874	3.64739	-17.6839	1.25981e-55	8.44187e-54	115.74
ENSG00000173706|protein_coding|HEG1	-2.00328	3.14406	-17.6605	1.63862e-55	1.09318e-53	115.478
ENSG00000184347|protein_coding|SLIT3	-2.05628	1.65897	-17.6576	1.69278e-55	1.12436e-53	115.446
ENSG00000164932|protein_coding|CTHRC1	3.24053	4.54255	17.6514	1.81682e-55	1.20148e-53	115.375
ENSG00000080546|protein_coding|SESN1	-1.4051	2.32525	-17.633	2.23362e-55	1.47069e-53	115.17
ENSG00000118777|protein_coding|ABCG2	-1.2419	1.04674	-17.6324	2.24785e-55	1.47366e-53	115.163
ENSG00000136546|protein_coding|SCN7A	-2.04388	1.54785	-17.6299	2.3132e-55	1.50996e-53	115.135
ENSG00000123178|protein_coding|SPRYD7	-1.03214	2.4699	-17.5521	5.54794e-55	3.60593e-53	114.264
ENSG00000164659|protein_coding|ELAPOR2	-1.71876	1.77062	-17.5483	5.79498e-55	3.75039e-53	114.221
ENSG00000046653|protein_coding|GPM6B	-1.52072	1.3967	-17.5455	5.98034e-55	3.85389e-53	114.189
ENSG00000117069|protein_coding|ST6GALNAC5	-1.75525	1.47861	-17.5154	8.38319e-55	5.37945e-53	113.853
ENSG00000114200|protein_coding|BCHE	-1.6048	0.925031	-17.4757	1.30959e-54	8.3681e-53	113.409
ENSG00000167850|protein_coding|CD300C	-1.66439	1.74096	-17.4611	1.54359e-54	9.82187e-53	113.245
ENSG00000137857|protein_coding|DUOX1	-2.74243	2.30798	-17.4107	2.71698e-54	1.72159e-52	112.682
ENSG00000182253|protein_coding|SYNM	-1.23931	1.3903	-17.3915	3.36944e-54	2.11729e-52	112.468
ENSG00000004776|protein_coding|HSPB6	-2.43284	2.26573	-17.3558	5.02431e-54	3.14414e-52	112.07
ENSG00000071282|protein_coding|LMCD1	-1.38504	2.18963	-17.3506	5.33064e-54	3.32211e-52	112.011
ENSG00000157570|protein_coding|TSPAN18	-1.64978	1.97891	-17.3306	6.66846e-54	4.13882e-52	111.788
ENSG00000131747|protein_coding|TOP2A	2.82155	3.63846	17.3275	6.90462e-54	4.2679e-52	111.754
ENSG00000079308|protein_coding|TNS1	-2.16148	4.0872	-17.3208	7.4444e-54	4.58285e-52	111.679
ENSG00000165757|protein_coding|JCAD	-1.83899	2.56863	-17.3033	9.05165e-54	5.54972e-52	111.484
ENSG00000163468|protein_coding|CCT3	1.35741	6.20803	17.2863	1.09512e-53	6.68728e-52	111.294
ENSG00000147526|protein_coding|TACC1	-1.78101	3.19842	-17.2806	1.1678e-53	7.10246e-52	111.23
ENSG00000032444|protein_coding|PNPLA6	-1.31633	3.51018	-17.2751	1.24121e-53	7.51876e-52	111.17
ENSG00000131055|protein_coding|COX4I2	-2.0509	2.74038	-17.2703	1.31017e-53	7.90485e-52	111.116
ENSG00000078081|protein_coding|LAMP3	-3.19345	4.54931	-17.254	1.57209e-53	9.44753e-52	110.935
ENSG00000137726|protein_coding|FXYD6	-1.60148	2.11206	-17.2449	1.73964e-53	1.04131e-51	110.834
ENSG00000145050|protein_coding|MANF	1.37101	5.20794	17.2178	2.35615e-53	1.39928e-51	110.532
ENSG00000197381|protein_coding|ADARB1	-1.309	1.77656	-17.2158	2.41057e-53	1.42601e-51	110.509
ENSG00000104918|protein_coding|RETN	-2.98604	1.89261	-17.1799	3.59868e-53	2.12056e-51	110.11
ENSG00000145990|protein_coding|GFOD1	-1.0168	0.918761	-17.1414	5.53225e-53	3.2473e-51	109.682
ENSG00000115306|protein_coding|SPTBN1	-1.65318	4.56641	-17.1182	7.17247e-53	4.19382e-51	109.423
ENSG00000169860|protein_coding|P2RY1	-1.06189	0.998128	-17.0722	1.19813e-52	6.95193e-51	108.913
ENSG00000138735|protein_coding|PDE5A	-1.30815	1.64308	-17.0021	2.61796e-52	1.51322e-50	108.135
ENSG00000109501|protein_coding|WFS1	-1.58569	3.92708	-16.9924	2.91504e-52	1.6755e-50	108.028
ENSG00000185624|protein_coding|P4HB	1.17955	7.82989	16.9923	2.92083e-52	1.6755e-50	108.026
ENSG00000160867|protein_coding|FGFR4	-2.28706	1.92415	-16.9669	3.87445e-52	2.21414e-50	107.744
ENSG00000035664|protein_coding|DAPK2	-1.40977	1.36131	-16.9378	5.35611e-52	3.04936e-50	107.422
ENSG00000160688|protein_coding|FLAD1	1.28907	3.7147	16.9196	6.55526e-52	3.70421e-50	107.221
ENSG00000186188|protein_coding|FFAR4	-1.29652	0.798593	-16.9113	7.19563e-52	4.05095e-50	107.128
ENSG00000157734|protein_coding|SNX22	-1.13495	1.12753	-16.9043	7.77468e-52	4.36073e-50	107.051
ENSG00000161281|protein_coding|COX7A1	-1.60957	2.60057	-16.8757	1.06854e-51	5.97118e-50	106.734
ENSG00000166927|protein_coding|MS4A7	-2.12316	3.08476	-16.8545	1.35287e-51	7.53228e-50	106.5
ENSG00000185010|protein_coding|F8	-1.2229	1.54263	-16.8372	1.63893e-51	9.09156e-50	106.309
ENSG00000117399|protein_coding|CDC20	2.75089	3.49678	16.8158	2.07787e-51	1.14844e-49	106.072
ENSG00000151702|protein_coding|FLI1	-1.35721	1.92575	-16.7541	4.1223e-51	2.26189e-49	105.39
ENSG00000077943|protein_coding|ITGA8	-1.75174	1.70022	-16.7436	4.63003e-51	2.53131e-49	105.275
ENSG00000168484|protein_coding|SFTPC	-7.72664	5.99155	-16.7342	5.13876e-51	2.79933e-49	105.171
ENSG00000128512|protein_coding|DOCK4	-1.28334	1.87416	-16.7243	5.73574e-51	3.11333e-49	105.062
ENSG00000187688|protein_coding|TRPV2	-1.71795	3.11907	-16.7149	6.36586e-51	3.44302e-49	104.958
ENSG00000185291|protein_coding|IL3RA	-1.4884	2.93474	-16.6895	8.43788e-51	4.54745e-49	104.677
ENSG00000205213|protein_coding|LGR4	2.01185	3.18653	16.6723	1.02022e-50	5.47881e-49	104.488
ENSG00000070614|protein_coding|NDST1	-1.41962	3.61177	-16.6651	1.10572e-50	5.91696e-49	104.408
ENSG00000183605|protein_coding|SFXN4	1.27781	3.73237	16.6626	1.13688e-50	6.06227e-49	104.381
ENSG00000112531|protein_coding|QKI	-1.21747	2.81654	-16.6534	1.25892e-50	6.68948e-49	104.279
ENSG00000126602|protein_coding|TRAP1	1.08135	3.55328	16.627	1.68611e-50	8.92813e-49	103.988
ENSG00000000938|protein_coding|FGR	-1.92478	2.86556	-16.6261	1.70133e-50	8.97734e-49	103.979
ENSG00000090006|protein_coding|LTBP4	-2.09365	3.73791	-16.6155	1.91476e-50	1.00684e-48	103.862
ENSG00000121075|protein_coding|TBX4	-1.84448	1.77756	-16.5879	2.5985e-50	1.36165e-48	103.558
ENSG00000164047|protein_coding|CAMP	-1.54241	0.753821	-16.5406	4.38171e-50	2.28816e-48	103.038
ENSG00000133246|protein_coding|PRAM1	-1.48063	1.37042	-16.495	7.24735e-50	3.74586e-48	102.537
ENSG00000177303|protein_coding|CASKIN2	-1.33855	2.95479	-16.4858	8.01906e-50	4.13063e-48	102.436
ENSG00000076604|protein_coding|TRAF4	1.32399	4.51615	16.4845	8.13399e-50	4.17563e-48	102.422
ENSG00000164855|protein_coding|TMEM184A	1.92163	2.41707	16.468	9.76216e-50	4.99453e-48	102.24
ENSG00000136732|protein_coding|GYPC	-1.58953	2.82373	-16.449	1.2042e-49	6.14021e-48	102.032
ENSG00000211445|protein_coding|GPX3	-2.51987	5.83942	-16.4413	1.31003e-49	6.65743e-48	101.948
ENSG00000204301|protein_coding|NOTCH4	-1.36309	1.85785	-16.4326	1.44199e-49	7.30353e-48	101.852
ENSG00000087074|protein_coding|PPP1R15A	-1.63534	4.87713	-16.4313	1.46362e-49	7.38093e-48	101.837
ENSG00000107833|protein_coding|NPM3	1.57458	4.40832	16.4311	1.46702e-49	7.38093e-48	101.835
ENSG00000183722|protein_coding|LHFPL6	-1.59404	3.74172	-16.4233	1.59845e-49	8.01553e-48	101.75
ENSG00000131634|protein_coding|TMEM204	-1.60679	3.27223	-16.4163	1.72628e-49	8.62797e-48	101.673
ENSG00000087589|protein_coding|CASS4	-1.34882	1.39602	-16.3595	3.22664e-49	1.60211e-47	101.051
ENSG00000134057|protein_coding|CCNB1	2.27853	3.57356	16.3464	3.72768e-49	1.84484e-47	100.907
ENSG00000149564|protein_coding|ESAM	-1.97613	4.0406	-16.3327	4.33307e-49	2.13746e-47	100.757
ENSG00000166025|protein_coding|AMOTL1	-1.57329	2.35681	-16.3184	5.06907e-49	2.4924e-47	100.601
ENSG00000204217|protein_coding|BMPR2	-1.14963	3.35673	-16.3062	5.7977e-49	2.84143e-47	100.467
ENSG00000159200|protein_coding|RCAN1	-1.50086	2.68057	-16.3025	6.04207e-49	2.95165e-47	100.426
ENSG00000110492|protein_coding|MDK	2.77293	6.5093	16.3015	6.1053e-49	2.97295e-47	100.416
ENSG00000006625|protein_coding|GGCT	1.56514	4.8344	16.2706	8.57286e-49	4.16113e-47	100.078
ENSG00000086232|protein_coding|EIF2AK1	1.0318	5.39595	16.2684	8.78302e-49	4.24952e-47	100.054
ENSG00000108773|protein_coding|KAT2A	1.57435	4.04531	16.2211	1.47607e-48	7.09785e-47	99.5372
ENSG00000122952|protein_coding|ZWINT	2.06208	3.41285	16.2211	1.47638e-48	7.09785e-47	99.537
ENSG00000141562|protein_coding|NARF	1.13104	3.24519	16.2174	1.53818e-48	7.37156e-47	99.4962
ENSG00000157510|protein_coding|AFAP1L1	-1.33067	1.93021	-16.2054	1.75408e-48	8.37974e-47	99.3655
ENSG00000067082|protein_coding|KLF6	-1.69663	4.87414	-16.1634	2.78152e-48	1.32048e-46	98.9066
ENSG00000173898|protein_coding|SPTBN2	1.71926	2.52029	16.1433	3.4659e-48	1.64024e-46	98.6877
ENSG00000147689|protein_coding|FAM83A	3.49703	3.37922	16.1404	3.57862e-48	1.68831e-46	98.6559
ENSG00000107738|protein_coding|VSIR	-1.48067	3.49007	-16.1331	3.87719e-48	1.82348e-46	98.5761
ENSG00000185483|protein_coding|ROR1	-1.34042	1.29123	-16.1304	3.99425e-48	1.87272e-46	98.5465
ENSG00000013306|protein_coding|SLC25A39	1.24801	5.55229	16.1198	4.4852e-48	2.09642e-46	98.4311
ENSG00000175130|protein_coding|MARCKSL1	1.93919	6.57989	16.1138	4.78657e-48	2.2304e-46	98.3664
ENSG00000174099|protein_coding|MSRB3	-1.66856	2.34309	-16.1047	5.29075e-48	2.45776e-46	98.2667
ENSG00000125459|protein_coding|MSTO1	1.0612	2.14251	16.1028	5.39956e-48	2.50064e-46	98.2465
ENSG00000173391|protein_coding|OLR1	-2.64985	3.43967	-16.0945	5.91513e-48	2.73106e-46	98.1557
ENSG00000169241|protein_coding|SLC50A1	1.67243	5.29313	16.0926	6.03669e-48	2.77871e-46	98.1355
ENSG00000150977|protein_coding|RILPL2	-1.08662	2.43817	-16.0793	6.98221e-48	3.2042e-46	97.9907
ENSG00000117411|protein_coding|B4GALT2	1.18585	4.00676	16.0599	8.63538e-48	3.95088e-46	97.7792
ENSG00000187116|protein_coding|LILRA5	-1.61027	1.63902	-16.0589	8.73029e-48	3.98228e-46	97.7683
ENSG00000161940|protein_coding|BCL6B	-1.35326	2.05945	-16.054	9.2088e-48	4.18793e-46	97.7152
ENSG00000122707|protein_coding|RECK	-1.12762	1.53402	-16.0485	9.78692e-48	4.43752e-46	97.6546
ENSG00000163513|protein_coding|TGFBR2	-1.73017	5.29698	-16.0254	1.2588e-47	5.6736e-46	97.4041
ENSG00000163938|protein_coding|GNL3	1.11636	4.59385	16.0214	1.31614e-47	5.91442e-46	97.3598
ENSG00000038945|protein_coding|MSR1	-2.29439	3.04064	-16.0041	1.58953e-47	7.12186e-46	97.172
ENSG00000163882|protein_coding|POLR2H	1.13703	4.018	15.9957	1.74242e-47	7.78384e-46	97.0806
ENSG00000170909|protein_coding|OSCAR	-2.03198	2.68763	-15.9937	1.781e-47	7.93277e-46	97.0588
ENSG00000101811|protein_coding|CSTF2	1.01134	3.37969	15.9847	1.96411e-47	8.72272e-46	96.9614
ENSG00000142273|protein_coding|CBLC	2.31298	3.25656	15.9824	2.01476e-47	8.92151e-46	96.9361
ENSG00000164741|protein_coding|DLC1	-2.25561	2.9324	-15.9821	2.02177e-47	8.92642e-46	96.9326
ENSG00000066629|protein_coding|EML1	-1.17555	1.30623	-15.9745	2.19552e-47	9.66541e-46	96.8506
ENSG00000029993|protein_coding|HMGB3	2.90027	5.37594	15.9725	2.24443e-47	9.85205e-46	96.8286
ENSG00000203499|protein_coding|IQANK1	1.85284	3.38601	15.9604	2.56081e-47	1.12084e-45	96.6974
ENSG00000138722|protein_coding|MMRN1	-1.69323	1.38518	-15.9523	2.79786e-47	1.22106e-45	96.6093
ENSG00000123243|protein_coding|ITIH5	-1.56985	1.16469	-15.9503	2.86113e-47	1.24331e-45	96.587
ENSG00000132970|protein_coding|WASF3	-1.44227	1.48704	-15.9406	3.17943e-47	1.37569e-45	96.4821
ENSG00000109458|protein_coding|GAB1	-1.0627	1.78434	-15.9347	3.38934e-47	1.46234e-45	96.4184
ENSG00000061656|protein_coding|SPAG4	1.91298	2.62277	15.9163	4.14525e-47	1.7834e-45	96.2181
ENSG00000123213|protein_coding|NLN	1.01424	2.08252	15.8959	5.17381e-47	2.21334e-45	95.9975
ENSG00000137393|protein_coding|RNF144B	-1.61814	2.93823	-15.8661	7.15962e-47	3.05423e-45	95.6743
ENSG00000111897|protein_coding|SERINC1	-1.10198	5.99978	-15.8579	7.83102e-47	3.33126e-45	95.5851
ENSG00000095713|protein_coding|CRTAC1	-3.16578	2.69069	-15.8269	1.09736e-46	4.642e-45	95.2493
ENSG00000100196|protein_coding|KDELR3	1.95551	4.40901	15.8121	1.28845e-46	5.42007e-45	95.0896
ENSG00000110799|protein_coding|VWF	-2.32989	4.29105	-15.7942	1.56532e-46	6.56652e-45	94.8959
ENSG00000019169|protein_coding|MARCO	-3.6221	4.37038	-15.7759	1.91046e-46	7.99225e-45	94.6976
ENSG00000175063|protein_coding|UBE2C	3.10756	4.04602	15.7615	2.23417e-46	9.32073e-45	94.5418
ENSG00000171303|protein_coding|KCNK3	-2.08837	1.45105	-15.7569	2.34708e-46	9.76488e-45	94.4928
ENSG00000156076|protein_coding|WIF1	-4.01963	2.44713	-15.7539	2.42642e-46	1.00673e-44	94.4597
ENSG00000175643|protein_coding|RMI2	1.58679	2.45511	15.7401	2.81706e-46	1.16562e-44	94.3112
ENSG00000171885|protein_coding|AQP4	-3.76885	3.33153	-15.7373	2.90396e-46	1.1983e-44	94.2809
ENSG00000112419|protein_coding|PHACTR2	-1.29213	2.14594	-15.7348	2.98418e-46	1.22806e-44	94.2538
ENSG00000160801|protein_coding|PTH1R	-1.15115	0.963933	-15.7209	3.46999e-46	1.42411e-44	94.1037
ENSG00000106688|protein_coding|SLC1A1	-2.19199	2.41577	-15.72	3.50585e-46	1.43494e-44	94.0935
ENSG00000160408|protein_coding|ST6GALNAC6	-1.21292	3.6344	-15.7054	4.10623e-46	1.67614e-44	93.9362
ENSG00000129467|protein_coding|ADCY4	-1.03204	1.1198	-15.7005	4.33203e-46	1.76355e-44	93.8829
ENSG00000134020|protein_coding|PEBP4	-3.82761	3.15685	-15.6979	4.45468e-46	1.80862e-44	93.8552
ENSG00000111863|protein_coding|ADTRP	-1.44623	1.0741	-15.692	4.75041e-46	1.92353e-44	93.7912
ENSG00000118785|protein_coding|SPP1	4.29287	6.44548	15.6854	5.1018e-46	2.06031e-44	93.7202
ENSG00000100307|protein_coding|CBX7	-1.40379	2.21971	-15.6839	5.18458e-46	2.08817e-44	93.7042
ENSG00000170477|protein_coding|KRT4	-2.57358	1.25553	-15.6704	6.00622e-46	2.41268e-44	93.5578
ENSG00000154734|protein_coding|ADAMTS1	-2.03549	2.67117	-15.6699	6.03651e-46	2.41844e-44	93.5528
ENSG00000128165|protein_coding|ADM2	1.74298	1.96625	15.6653	6.34135e-46	2.52719e-44	93.5038
ENSG00000119862|protein_coding|LGALSL	-1.62408	2.61626	-15.6577	6.8893e-46	2.73119e-44	93.4213
ENSG00000109846|protein_coding|CRYAB	-1.7938	2.11277	-15.6555	7.05208e-46	2.78843e-44	93.3981
ENSG00000167900|protein_coding|TK1	2.30971	4.54001	15.6371	8.61333e-46	3.39688e-44	93.1991
ENSG00000183048|protein_coding|SLC25A10	1.59619	2.70443	15.6332	8.98437e-46	3.53401e-44	93.1571
ENSG00000073910|protein_coding|FRY	-1.12483	1.47607	-15.6289	9.41637e-46	3.69434e-44	93.1104
ENSG00000115602|protein_coding|IL1RL1	-1.97467	0.910215	-15.6239	9.93423e-46	3.88744e-44	93.0571
ENSG00000134690|protein_coding|CDCA8	2.02499	2.71347	15.6218	1.01683e-45	3.96878e-44	93.0339
ENSG00000172403|protein_coding|SYNPO2	-1.22782	1.16805	-15.6137	1.1091e-45	4.31781e-44	92.9475
ENSG00000135540|protein_coding|NHSL1	-1.47292	1.94025	-15.6128	1.12028e-45	4.35012e-44	92.9375
ENSG00000119147|protein_coding|ECRG4	-1.95972	1.03642	-15.6107	1.14583e-45	4.43795e-44	92.9151
ENSG00000130164|protein_coding|LDLR	-1.84224	3.81497	-15.5984	1.30921e-45	5.05783e-44	92.7825
ENSG00000156052|protein_coding|GNAQ	-1.11199	3.89212	-15.5934	1.3826e-45	5.31426e-44	92.7282
ENSG00000114686|protein_coding|MRPL3	1.06082	5.00277	15.5786	1.62172e-45	6.21756e-44	92.5695
ENSG00000130826|protein_coding|DKC1	1.08856	4.13162	15.5674	1.83146e-45	7.00396e-44	92.4485
ENSG00000177494|protein_coding|ZBED2	-1.81236	1.52535	-15.5578	2.0322e-45	7.75204e-44	92.345
ENSG00000128059|protein_coding|PPAT	1.24315	2.09494	15.5446	2.34311e-45	8.91558e-44	92.2033
ENSG00000119888|protein_coding|EPCAM	1.59559	7.29608	15.5366	2.55409e-45	9.69401e-44	92.1175
ENSG00000278259|protein_coding|MYO19	1.14221	2.12728	15.4888	4.28131e-45	1.61686e-43	91.6036
ENSG00000188015|protein_coding|S100A3	-1.66105	1.49101	-15.481	4.6582e-45	1.75482e-43	91.5196
ENSG00000129250|protein_coding|KIF1C	-1.19897	4.19735	-15.4667	5.43252e-45	2.04144e-43	91.3666
ENSG00000206053|protein_coding|JPT2	1.13826	5.03646	15.4637	5.61215e-45	2.10372e-43	91.3343
ENSG00000162062|protein_coding|TEDC2	1.37716	1.46993	15.4615	5.74686e-45	2.1489e-43	91.3107
ENSG00000119865|protein_coding|CNRIP1	-1.10891	1.65219	-15.458	5.9675e-45	2.22591e-43	91.2732
ENSG00000154065|protein_coding|ANKRD29	-2.05418	1.78044	-15.4566	6.06204e-45	2.25562e-43	91.2575
ENSG00000116678|protein_coding|LEPR	-1.53952	1.42528	-15.4561	6.08869e-45	2.25998e-43	91.2532
ENSG00000138670|protein_coding|RASGEF1B	-1.10424	1.71293	-15.4453	6.84434e-45	2.53425e-43	91.1368
ENSG00000137804|protein_coding|NUSAP1	1.93263	3.10237	15.4394	7.29115e-45	2.68655e-43	91.0739
ENSG00000110660|protein_coding|SLC35F2	1.59096	3.37705	15.4348	7.66611e-45	2.81785e-43	91.024
ENSG00000183856|protein_coding|IQGAP3	1.8784	2.1051	15.4267	8.36098e-45	3.05842e-43	90.9376
ENSG00000166482|protein_coding|MFAP4	-2.96859	5.13027	-15.4133	9.66284e-45	3.52612e-43	90.7936
ENSG00000157778|protein_coding|PSMG3	1.43897	4.24784	15.4091	1.01058e-44	3.67889e-43	90.7491
ENSG00000188921|protein_coding|HACD4	-1.15203	1.71789	-15.4065	1.03932e-44	3.77446e-43	90.7212
ENSG00000163710|protein_coding|PCOLCE2	-2.0065	1.48342	-15.3947	1.18034e-44	4.27633e-43	90.5946
ENSG00000182004|protein_coding|SNRPE	1.14939	5.00823	15.3583	1.74659e-44	6.29772e-43	90.2047
ENSG00000146966|protein_coding|DENND2A	-1.31302	1.48881	-15.3425	2.06985e-44	7.44557e-43	90.0357
ENSG00000197405|protein_coding|C5AR1	-1.85652	3.2499	-15.3349	2.24621e-44	8.06079e-43	89.9544
ENSG00000185432|protein_coding|METTL7A	-1.98134	4.2174	-15.3223	2.5737e-44	9.21421e-43	89.819
ENSG00000180772|protein_coding|AGTR2	-2.44958	1.16051	-15.3143	2.80442e-44	1.00165e-42	89.7336
ENSG00000112984|protein_coding|KIF20A	1.80205	2.20198	15.3128	2.85001e-44	1.01554e-42	89.7175
ENSG00000144681|protein_coding|STAC	-1.65625	1.37636	-15.308	2.99871e-44	1.06602e-42	89.6669
ENSG00000111640|protein_coding|GAPDH	1.65754	9.20637	15.3055	3.08202e-44	1.09307e-42	89.6397
ENSG00000146072|protein_coding|TNFRSF21	1.84601	5.47063	15.2797	4.0661e-44	1.43202e-42	89.364
ENSG00000143110|protein_coding|C1orf162	-1.68505	3.05007	-15.2777	4.15298e-44	1.45923e-42	89.343
ENSG00000214491|protein_coding|SEC14L6	-1.82683	1.4524	-15.2736	4.33932e-44	1.52117e-42	89.2993
ENSG00000088325|protein_coding|TPX2	2.56051	3.3737	15.2562	5.23459e-44	1.83078e-42	89.1127
ENSG00000139874|protein_coding|SSTR1	-1.58767	0.89271	-15.2334	6.67905e-44	2.32523e-42	88.8702
ENSG00000189159|protein_coding|JPT1	1.58698	5.26886	15.225	7.31509e-44	2.54082e-42	88.7797
ENSG00000136261|protein_coding|BZW2	1.27086	4.5828	15.2242	7.37801e-44	2.55681e-42	88.7712
ENSG00000137033|protein_coding|IL33	-2.32467	2.94421	-15.2238	7.40899e-44	2.56169e-42	88.7671
ENSG00000162851|protein_coding|TFB2M	1.10342	3.67491	15.2137	8.24969e-44	2.84586e-42	88.6601
ENSG00000113555|protein_coding|PCDH12	-1.27752	1.97748	-15.2126	8.35433e-44	2.87541e-42	88.6476
ENSG00000049283|protein_coding|EPN3	1.7108	2.06288	15.207	8.87319e-44	3.04706e-42	88.5876
ENSG00000176920|protein_coding|FUT2	1.98286	2.52242	15.2025	9.30311e-44	3.18747e-42	88.5406
ENSG00000165124|protein_coding|SVEP1	-1.58788	1.37282	-15.2004	9.51943e-44	3.25423e-42	88.5177
ENSG00000162407|protein_coding|PLPP3	-1.26165	3.80027	-15.1828	1.14989e-43	3.92205e-42	88.3298
ENSG00000078596|protein_coding|ITM2A	-1.89823	3.27186	-15.1821	1.1576e-43	3.93949e-42	88.3231
ENSG00000100060|protein_coding|MFNG	-1.36033	2.73723	-15.1793	1.19329e-43	4.05183e-42	88.2929
ENSG00000183607|protein_coding|GKN2	-3.43777	1.82524	-15.1746	1.25546e-43	4.2534e-42	88.2424
ENSG00000073712|protein_coding|FERMT2	-1.21416	2.74771	-15.1672	1.35895e-43	4.59375e-42	88.1636
ENSG00000164850|protein_coding|GPER1	-1.35096	1.02299	-15.1468	1.68885e-43	5.68356e-42	87.9474
ENSG00000106462|protein_coding|EZH2	1.57011	2.20903	15.1398	1.82114e-43	6.11515e-42	87.8723
ENSG00000171992|protein_coding|SYNPO	-1.6609	3.68662	-15.133	1.95931e-43	6.56456e-42	87.7996
ENSG00000021852|protein_coding|C8B	-1.79734	0.75126	-15.1205	2.23916e-43	7.48562e-42	87.6668
ENSG00000197766|protein_coding|CFD	-2.54635	4.14573	-15.1157	2.35587e-43	7.85845e-42	87.6162
ENSG00000136826|protein_coding|KLF4	-2.27407	3.19796	-15.112	2.45202e-43	8.16118e-42	87.5764
ENSG00000143217|protein_coding|NECTIN4	2.0194	3.96499	15.1032	2.69489e-43	8.94987e-42	87.4825
ENSG00000204394|protein_coding|VARS1	1.1619	4.3679	15.0989	2.81898e-43	9.3415e-42	87.4377
ENSG00000004799|protein_coding|PDK4	-2.51978	3.18555	-15.098	2.84818e-43	9.41766e-42	87.4274
ENSG00000157456|protein_coding|CCNB2	1.93596	2.57045	15.0925	3.02132e-43	9.96838e-42	87.3687
ENSG00000186193|protein_coding|SAPCD2	1.84011	2.01811	15.0821	3.37516e-43	1.11116e-41	87.2586
ENSG00000120057|protein_coding|SFRP5	-1.57583	0.686846	-15.0727	3.7329e-43	1.22627e-41	87.1584
ENSG00000140945|protein_coding|CDH13	-1.14327	1.03681	-15.0688	3.88928e-43	1.27212e-41	87.1175
ENSG00000141696|protein_coding|P3H4	1.66077	3.27894	15.0507	4.71708e-43	1.53956e-41	86.9256
ENSG00000064205|protein_coding|CCN5	-1.6436	1.67416	-15.05	4.7523e-43	1.54772e-41	86.9182
ENSG00000169442|protein_coding|CD52	-2.38563	5.34018	-15.039	5.34422e-43	1.73676e-41	86.8014
ENSG00000166851|protein_coding|PLK1	1.8647	2.28176	15.0388	5.36031e-43	1.73826e-41	86.7984
ENSG00000089685|protein_coding|BIRC5	2.38614	2.91977	15.0359	5.52674e-43	1.7884e-41	86.768
ENSG00000159640|protein_coding|ACE	-1.53081	2.53025	-15.0216	6.4382e-43	2.07447e-41	86.6161
ENSG00000076382|protein_coding|SPAG5	1.85535	2.36253	15.0019	7.94186e-43	2.54274e-41	86.4073
ENSG00000174059|protein_coding|CD34	-1.42732	2.67828	-14.9866	9.34614e-43	2.98603e-41	86.2454
ENSG00000138639|protein_coding|ARHGAP24	-1.01447	1.54998	-14.9723	1.0882e-42	3.46211e-41	86.094
ENSG00000058335|protein_coding|RASGRF1	-1.91304	1.26111	-14.9667	1.15487e-42	3.66653e-41	86.0349
ENSG00000025423|protein_coding|HSD17B6	-2.81521	2.96863	-14.9281	1.74184e-42	5.51851e-41	85.6261
ENSG00000185803|protein_coding|SLC52A2	1.37116	4.66859	14.9213	1.87256e-42	5.92027e-41	85.5541
ENSG00000169554|protein_coding|ZEB2	-1.12733	1.6381	-14.915	2.00392e-42	6.32236e-41	85.4867
ENSG00000124766|protein_coding|SOX4	1.63629	5.11903	14.9125	2.05785e-42	6.47903e-41	85.4603
ENSG00000117114|protein_coding|ADGRL2	-1.71508	2.53542	-14.9106	2.09886e-42	6.59443e-41	85.4406
ENSG00000171848|protein_coding|RRM2	2.2286	2.99136	14.9075	2.16939e-42	6.8019e-41	85.4078
ENSG00000144642|protein_coding|RBMS3	-1.21428	1.40105	-14.8992	2.36889e-42	7.4055e-41	85.3202
ENSG00000153823|protein_coding|PID1	-1.89672	2.40167	-14.8991	2.37168e-42	7.4055e-41	85.3191
ENSG00000148841|protein_coding|ITPRIP	-1.36192	2.58472	-14.8727	3.14094e-42	9.76722e-41	85.0396
ENSG00000130762|protein_coding|ARHGEF16	1.37861	2.81446	14.8713	3.18688e-42	9.88978e-41	85.0252
ENSG00000155659|protein_coding|VSIG4	-2.55001	4.34563	-14.8631	3.4769e-42	1.07677e-40	84.9386
ENSG00000108823|protein_coding|SGCA	-1.5103	1.43925	-14.8517	3.92445e-42	1.21289e-40	84.8181
ENSG00000105011|protein_coding|ASF1B	1.769	2.86336	14.8512	3.94499e-42	1.21676e-40	84.8129
ENSG00000152583|protein_coding|SPARCL1	-1.99669	5.5222	-14.8342	4.72501e-42	1.45143e-40	84.6335
ENSG00000122565|protein_coding|CBX3	1.06345	5.38462	14.8273	5.08513e-42	1.55889e-40	84.5604
ENSG00000179820|protein_coding|MYADM	-1.81533	5.27833	-14.8226	5.34279e-42	1.63457e-40	84.5112
ENSG00000173715|protein_coding|C11orf80	1.14136	2.68457	14.8209	5.442e-42	1.66156e-40	84.4929
ENSG00000160957|protein_coding|RECQL4	1.82452	2.37457	14.8081	6.23417e-42	1.8996e-40	84.3578
ENSG00000179144|protein_coding|GIMAP7	-1.75407	3.4982	-14.8061	6.3675e-42	1.93633e-40	84.3367
ENSG00000136842|protein_coding|TMOD1	-1.08834	0.992541	-14.7951	7.15079e-42	2.17017e-40	84.2213
ENSG00000204161|protein_coding|TMEM273	-1.31133	1.93217	-14.7897	7.57704e-42	2.29122e-40	84.1637
ENSG00000167641|protein_coding|PPP1R14A	-1.71018	2.59693	-14.778	8.57721e-42	2.58751e-40	84.0404
ENSG00000112242|protein_coding|E2F3	1.11598	2.61868	14.7773	8.6393e-42	2.60106e-40	84.0332
ENSG00000184216|protein_coding|IRAK1	1.21881	5.33869	14.7764	8.72384e-42	2.62131e-40	84.0235
ENSG00000143621|protein_coding|ILF2	1.10896	6.55183	14.7659	9.74825e-42	2.91754e-40	83.9131
ENSG00000121068|protein_coding|TBX2	-1.61336	2.38288	-14.7646	9.88276e-42	2.95196e-40	83.8995
ENSG00000115541|protein_coding|HSPE1	1.26375	5.29904	14.7601	1.03628e-41	3.08925e-40	83.8523
ENSG00000147027|protein_coding|TMEM47	-1.56921	2.5123	-14.7478	1.18007e-41	3.51101e-40	83.7231
ENSG00000119138|protein_coding|KLF9	-1.53203	3.51278	-14.7475	1.18429e-41	3.51665e-40	83.7195
ENSG00000100558|protein_coding|PLEK2	1.94952	3.16633	14.7445	1.22282e-41	3.62396e-40	83.6877
ENSG00000102547|protein_coding|CAB39L	-1.06668	1.8383	-14.7395	1.28903e-41	3.8127e-40	83.6352
ENSG00000153093|protein_coding|ACOXL	-1.2487	0.922283	-14.7335	1.37257e-41	4.05188e-40	83.5728
ENSG00000076067|protein_coding|RBMS2	-1.10909	3.1824	-14.7327	1.38442e-41	4.07893e-40	83.5642
ENSG00000144381|protein_coding|HSPD1	1.25935	6.11455	14.7173	1.62961e-41	4.78272e-40	83.402
ENSG00000123500|protein_coding|COL10A1	2.90312	3.13977	14.7161	1.65115e-41	4.83657e-40	83.389
ENSG00000183287|protein_coding|CCBE1	-1.68877	0.992311	-14.707	1.81776e-41	5.30408e-40	83.2934
ENSG00000143382|protein_coding|ADAMTSL4	-1.74145	2.26496	-14.6995	1.96708e-41	5.72873e-40	83.2148
ENSG00000117394|protein_coding|SLC2A1	2.70064	4.3425	14.6751	2.54573e-41	7.38556e-40	82.9584
ENSG00000140044|protein_coding|JDP2	-1.10834	2.57507	-14.6664	2.79058e-41	8.0804e-40	82.867
ENSG00000101282|protein_coding|RSPO4	-1.43771	0.876603	-14.6241	4.36258e-41	1.26082e-39	82.4226
ENSG00000067177|protein_coding|PHKA1	1.13226	2.16209	14.6237	4.37913e-41	1.26319e-39	82.4189
ENSG00000074800|protein_coding|ENO1	1.24997	8.72016	14.6205	4.53075e-41	1.30444e-39	82.385
ENSG00000104738|protein_coding|MCM4	1.75135	3.45599	14.5932	6.04325e-41	1.73004e-39	82.0985
ENSG00000141448|protein_coding|GATA6	-1.73833	2.10921	-14.567	7.96192e-41	2.27072e-39	81.8243
ENSG00000158373|protein_coding|H2BC5	2.15489	4.13099	14.5604	8.535e-41	2.42959e-39	81.7552
ENSG00000138180|protein_coding|CEP55	1.99791	2.53089	14.5484	9.68005e-41	2.74522e-39	81.63
ENSG00000260314|protein_coding|MRC1	-2.69554	3.87544	-14.548	9.71921e-41	2.75117e-39	81.626
ENSG00000152137|protein_coding|HSPB8	-1.99488	3.32084	-14.5415	1.04073e-40	2.93497e-39	81.5579
ENSG00000175662|protein_coding|TOM1L2	-1.16767	2.85867	-14.54	1.05817e-40	2.97861e-39	81.5414
ENSG00000101057|protein_coding|MYBL2	2.81729	3.46316	14.5395	1.06307e-40	2.98558e-39	81.5368
ENSG00000147443|protein_coding|DOK2	-1.77207	3.05916	-14.5394	1.06459e-40	2.98558e-39	81.5354
ENSG00000182199|protein_coding|SHMT2	1.33627	4.32481	14.529	1.1878e-40	3.32496e-39	81.4265
ENSG00000169718|protein_coding|DUS1L	1.16018	4.12779	14.5178	1.33507e-40	3.72345e-39	81.3102
ENSG00000106809|protein_coding|OGN	-1.90721	1.28298	-14.5112	1.43194e-40	3.98628e-39	81.2406
ENSG00000183087|protein_coding|GAS6	-1.80381	4.11399	-14.5027	1.56561e-40	4.34241e-39	81.1518
ENSG00000137288|protein_coding|UQCC2	1.23214	3.13812	14.4806	1.97521e-40	5.4585e-39	80.9207
ENSG00000157593|protein_coding|SLC35B2	1.01591	5.24629	14.4803	1.98124e-40	5.4652e-39	80.9177
ENSG00000138772|protein_coding|ANXA3	-1.99727	3.46421	-14.4753	2.08816e-40	5.74965e-39	80.8654
ENSG00000103994|protein_coding|ZNF106	-1.13775	2.76963	-14.4744	2.10775e-40	5.79307e-39	80.8561
ENSG00000148082|protein_coding|SHC3	-1.14646	0.964822	-14.4694	2.22037e-40	6.09154e-39	80.8043
ENSG00000068001|protein_coding|HYAL2	-1.03169	4.15022	-14.4669	2.2794e-40	6.24219e-39	80.7783
ENSG00000166123|protein_coding|GPT2	2.18612	2.97634	14.4624	2.39112e-40	6.5363e-39	80.7307
ENSG00000130518|protein_coding|IQCN	-1.2299	0.81882	-14.4521	2.66416e-40	7.26955e-39	80.6231
ENSG00000168528|protein_coding|SERINC2	1.87568	5.42506	14.4345	3.20263e-40	8.68491e-39	80.4401
ENSG00000142945|protein_coding|KIF2C	2.03	2.39079	14.4344	3.2058e-40	8.68491e-39	80.4391
ENSG00000125910|protein_coding|S1PR4	-1.45705	2.2445	-14.4289	3.39803e-40	9.15653e-39	80.3812
ENSG00000101938|protein_coding|CHRDL1	-2.42255	2.3246	-14.4224	3.63807e-40	9.78595e-39	80.3133
ENSG00000170890|protein_coding|PLA2G1B	-2.9606	2.1114	-14.4201	3.72483e-40	1.00016e-38	80.2899
ENSG00000154764|protein_coding|WNT7A	-1.45657	0.669055	-14.4069	4.27721e-40	1.14442e-38	80.1523
ENSG00000137309|protein_coding|HMGA1	2.03006	6.31004	14.4046	4.38289e-40	1.17062e-38	80.1281
ENSG00000095637|protein_coding|SORBS1	-1.23829	1.72995	-14.3893	5.14606e-40	1.37204e-38	79.9684
ENSG00000154330|protein_coding|PGM5	-1.38244	1.22669	-14.3889	5.16783e-40	1.37542e-38	79.9642
ENSG00000003249|protein_coding|DBNDD1	1.47902	2.71709	14.3775	5.82032e-40	1.54637e-38	79.846
ENSG00000198937|protein_coding|CCDC167	1.3713	4.55526	14.3708	6.24296e-40	1.65575e-38	79.7763
ENSG00000101335|protein_coding|MYL9	-1.75282	5.80994	-14.3678	6.44546e-40	1.70647e-38	79.7446
ENSG00000130590|protein_coding|SAMD10	1.27598	2.45935	14.3372	8.87454e-40	2.34139e-38	79.4265
ENSG00000133195|protein_coding|SLC39A11	1.19376	3.60252	14.3267	9.90416e-40	2.6085e-38	79.3174
ENSG00000118946|protein_coding|PCDH17	-1.29452	1.82435	-14.3257	1.00032e-39	2.63e-38	79.3075
ENSG00000164934|protein_coding|DCAF13	1.05905	2.67568	14.3203	1.05839e-39	2.77787e-38	79.2514
ENSG00000197930|protein_coding|ERO1A	1.71526	4.57555	14.2912	1.43523e-39	3.76041e-38	78.9485
ENSG00000147113|protein_coding|DIPK2B	-1.14183	1.59051	-14.2839	1.54896e-39	4.03744e-38	78.8727
ENSG00000160593|protein_coding|JAML	-1.48647	1.9528	-14.2815	1.58773e-39	4.13137e-38	78.8481
ENSG00000149269|protein_coding|PAK1	1.07269	3.74014	14.2617	1.95306e-39	5.07325e-38	78.6422
ENSG00000166803|protein_coding|PCLAF	1.64328	2.14222	14.2589	2.01058e-39	5.21375e-38	78.6133
ENSG00000106991|protein_coding|ENG	-1.54632	5.25901	-14.2572	2.04604e-39	5.29661e-38	78.5959
ENSG00000180061|protein_coding|TMEM150B	-1.37527	1.53934	-14.2563	2.06523e-39	5.33718e-38	78.5866
ENSG00000117650|protein_coding|NEK2	1.89445	2.12573	14.2191	3.04366e-39	7.79918e-38	78.201
ENSG00000140254|protein_coding|DUOXA1	-2.06444	2.06693	-14.2075	3.43377e-39	8.78395e-38	78.0811
ENSG00000176971|protein_coding|FIBIN	-1.94497	2.30681	-14.1801	4.56884e-39	1.16286e-37	77.7971
ENSG00000160606|protein_coding|TLCD1	1.53674	3.85194	14.1749	4.82265e-39	1.22541e-37	77.7433
ENSG00000140092|protein_coding|FBLN5	-1.86961	3.31282	-14.1667	5.25218e-39	1.33231e-37	77.6585
ENSG00000119326|protein_coding|CTNNAL1	-1.27309	3.6764	-14.1634	5.43622e-39	1.37669e-37	77.6243
ENSG00000135069|protein_coding|PSAT1	2.33502	3.10753	14.157	5.80917e-39	1.46868e-37	77.5583
ENSG00000011426|protein_coding|ANLN	2.15325	2.53778	14.1568	5.81944e-39	1.46883e-37	77.5565
ENSG00000143320|protein_coding|CRABP2	4.24145	5.69924	14.149	6.31479e-39	1.5912e-37	77.4753
ENSG00000143590|protein_coding|EFNA3	1.44919	1.73547	14.1284	7.81498e-39	1.96595e-37	77.2634
ENSG00000126249|protein_coding|PDCD2L	1.15448	2.63981	14.1155	8.93669e-39	2.2444e-37	77.13
ENSG00000187583|protein_coding|PLEKHN1	1.41548	1.6325	14.099	1.06116e-38	2.66064e-37	76.9592
ENSG00000103034|protein_coding|NDRG4	-1.23461	0.993059	-14.0972	1.08073e-38	2.70523e-37	76.941
ENSG00000183801|protein_coding|OLFML1	-1.31872	1.94144	-14.0939	1.11827e-38	2.79456e-37	76.9071
ENSG00000147257|protein_coding|GPC3	-2.62125	3.20295	-14.0772	1.32975e-38	3.31758e-37	76.7349
ENSG00000138160|protein_coding|KIF11	1.65869	2.32541	14.0726	1.3959e-38	3.47689e-37	76.6866
ENSG00000278619|protein_coding|MRM1	1.01308	2.42845	14.0698	1.4356e-38	3.56991e-37	76.6587
ENSG00000006740|protein_coding|ARHGAP44	-1.37805	1.81535	-14.0558	1.66037e-38	4.11531e-37	76.5141
ENSG00000141582|protein_coding|CBX4	1.04788	3.89645	14.0404	1.94757e-38	4.81141e-37	76.3555
ENSG00000138434|protein_coding|ITPRID2	-1.11998	3.72892	-14.0183	2.44999e-38	6.04278e-37	76.1273
ENSG00000164687|protein_coding|FABP5	-1.89459	2.89684	-14.0168	2.48828e-38	6.1173e-37	76.1119
ENSG00000182481|protein_coding|KPNA2	1.7756	4.75192	14.0129	2.59e-38	6.34675e-37	76.072
ENSG00000007402|protein_coding|CACNA2D2	-3.03665	2.84216	-14.0099	2.67085e-38	6.5343e-37	76.0415
ENSG00000158352|protein_coding|SHROOM4	-1.39613	1.75453	-14.0075	2.73754e-38	6.6759e-37	76.017
ENSG00000109586|protein_coding|GALNT7	1.38541	3.38631	14.0025	2.88446e-38	7.02287e-37	75.965
ENSG00000101311|protein_coding|FERMT1	1.8091	2.27757	13.9987	2.99815e-38	7.28796e-37	75.9266
ENSG00000184363|protein_coding|PKP3	1.44028	4.27861	13.9926	3.19375e-38	7.75098e-37	75.8637
ENSG00000111058|protein_coding|ACSS3	-1.0173	0.839474	-13.9858	3.42906e-38	8.28225e-37	75.793
ENSG00000132680|protein_coding|KHDC4	1.27583	3.25651	13.9816	3.57831e-38	8.62898e-37	75.7507
ENSG00000179348|protein_coding|GATA2	-1.43595	1.97368	-13.9813	3.59151e-38	8.64704e-37	75.747
ENSG00000162849|protein_coding|KIF26B	1.52376	1.78725	13.9747	3.84516e-38	9.21378e-37	75.6792
ENSG00000139970|protein_coding|RTN1	-1.07086	1.10504	-13.9586	4.53848e-38	1.08408e-36	75.5144
ENSG00000092964|protein_coding|DPYSL2	-1.63176	4.49565	-13.9577	4.5828e-38	1.09294e-36	75.5047
ENSG00000136240|protein_coding|KDELR2	1.0206	6.4623	13.9518	4.86955e-38	1.1595e-36	75.4444
ENSG00000276043|protein_coding|UHRF1	1.522	1.71256	13.9432	5.3232e-38	1.26553e-36	75.3558
ENSG00000148516|protein_coding|ZEB1	-1.0949	1.88842	-13.9348	5.80271e-38	1.37737e-36	75.2701
ENSG00000094804|protein_coding|CDC6	1.73029	2.00435	13.9322	5.96177e-38	1.41291e-36	75.2432
ENSG00000137648|protein_coding|TMPRSS4	2.68196	2.85538	13.9197	6.78002e-38	1.60182e-36	75.1153
ENSG00000198901|protein_coding|PRC1	1.63561	2.44601	13.912	7.34527e-38	1.73266e-36	75.0357
ENSG00000175445|protein_coding|LPL	-2.73233	3.19038	-13.9114	7.39252e-38	1.74109e-36	75.0293
ENSG00000033100|protein_coding|CHPF2	1.01759	4.58738	13.9084	7.6238e-38	1.79278e-36	74.9987
ENSG00000090889|protein_coding|KIF4A	1.82106	1.9872	13.9061	7.80469e-38	1.83247e-36	74.9754
ENSG00000101955|protein_coding|SRPX	-1.75278	2.27122	-13.8963	8.63671e-38	2.01843e-36	74.8747
ENSG00000223573|protein_coding|TINCR	-1.31752	0.737604	-13.895	8.74674e-38	2.041e-36	74.8621
ENSG00000178999|protein_coding|AURKB	1.97413	2.34744	13.894	8.84205e-38	2.06006e-36	74.8513
ENSG00000071967|protein_coding|CYBRD1	-1.9794	4.61082	-13.8874	9.46501e-38	2.20181e-36	74.7836
ENSG00000078114|protein_coding|NEBL	-1.53967	2.43839	-13.8736	1.09079e-37	2.53358e-36	74.6426
ENSG00000149534|protein_coding|MS4A2	-1.26376	1.00549	-13.8694	1.13889e-37	2.64126e-36	74.5997
ENSG00000160753|protein_coding|RUSC1	1.03597	3.36063	13.8641	1.20341e-37	2.78661e-36	74.5449
ENSG00000085552|protein_coding|IGSF9	1.75793	2.04072	13.8487	1.40928e-37	3.25834e-36	74.3879
ENSG00000101189|protein_coding|MRGBP	1.00876	3.20617	13.8279	1.74624e-37	4.02513e-36	74.1748
ENSG00000124942|protein_coding|AHNAK	-2.07243	4.9883	-13.8257	1.78659e-37	4.11186e-36	74.1521
ENSG00000168496|protein_coding|FEN1	1.3786	3.61731	13.8208	1.87864e-37	4.31404e-36	74.1021
ENSG00000108179|protein_coding|PPIF	1.08215	4.44176	13.8207	1.88013e-37	4.31404e-36	74.1013
ENSG00000138593|protein_coding|SECISBP2L	-1.36856	3.24761	-13.8165	1.96401e-37	4.49969e-36	74.0579
ENSG00000143321|protein_coding|HDGF	1.05402	6.62416	13.81	2.09831e-37	4.79289e-36	73.9922
ENSG00000101003|protein_coding|GINS1	1.56493	1.92388	13.8083	2.13618e-37	4.87203e-36	73.9744
ENSG00000121211|protein_coding|MND1	1.2008	1.41854	13.808	2.14267e-37	4.87949e-36	73.9714
ENSG00000108342|protein_coding|CSF3	-2.1716	0.950317	-13.8065	2.176e-37	4.94795e-36	73.9561
ENSG00000205364|protein_coding|MT1M	-2.21368	1.83498	-13.805	2.20885e-37	5.01512e-36	73.9412
ENSG00000159147|protein_coding|DONSON	1.06881	2.26989	13.7949	2.45279e-37	5.56063e-36	73.837
ENSG00000079616|protein_coding|KIF22	1.07529	3.52224	13.7924	2.51526e-37	5.68525e-36	73.812
ENSG00000134333|protein_coding|LDHA	1.31831	6.83979	13.7893	2.59656e-37	5.86024e-36	73.7804
ENSG00000165410|protein_coding|CFL2	-1.17843	2.33658	-13.778	2.91667e-37	6.57293e-36	73.6648
ENSG00000214160|protein_coding|ALG3	1.0657	3.96002	13.7529	3.77395e-37	8.46706e-36	73.4087
ENSG00000198624|protein_coding|CCDC69	-1.52231	3.3388	-13.752	3.8063e-37	8.52702e-36	73.4002
ENSG00000114698|protein_coding|PLSCR4	-1.31016	2.69768	-13.729	4.81853e-37	1.07787e-35	73.1658
ENSG00000235750|protein_coding|KIAA0040	-1.08475	3.52092	-13.7245	5.04642e-37	1.12718e-35	73.1198
ENSG00000102575|protein_coding|ACP5	-1.72148	5.32285	-13.7135	5.64928e-37	1.25998e-35	73.0077
ENSG00000136869|protein_coding|TLR4	-1.45792	2.17959	-13.7125	5.70647e-37	1.27087e-35	72.9977
ENSG00000134285|protein_coding|FKBP11	1.4621	3.22359	13.707	6.04107e-37	1.34341e-35	72.941
ENSG00000174804|protein_coding|FZD4	-1.38673	2.37945	-13.7056	6.13007e-37	1.3612e-35	72.9265
ENSG00000172322|protein_coding|CLEC12A	-1.36994	1.25134	-13.7014	6.39616e-37	1.4182e-35	72.8842
ENSG00000154127|protein_coding|UBASH3B	-1.14551	1.36375	-13.6987	6.57347e-37	1.45539e-35	72.8571
ENSG00000123131|protein_coding|PRDX4	1.38337	5.78355	13.6957	6.77922e-37	1.49875e-35	72.8264
ENSG00000129675|protein_coding|ARHGEF6	-1.27108	2.32042	-13.6833	7.70164e-37	1.69526e-35	72.6996
ENSG00000066468|protein_coding|FGFR2	-1.71347	2.02129	-13.6801	7.9579e-37	1.74912e-35	72.6671
ENSG00000169926|protein_coding|KLF13	-1.24887	3.51024	-13.6734	8.51495e-37	1.86885e-35	72.5998
ENSG00000166961|protein_coding|MS4A15	-3.32749	2.13997	-13.6626	9.51352e-37	2.08499e-35	72.4896
ENSG00000145386|protein_coding|CCNA2	1.83786	2.57152	13.6569	1.00823e-36	2.20645e-35	72.4319
ENSG00000112578|protein_coding|BYSL	1.14514	3.49953	13.6468	1.11786e-36	2.43931e-35	72.3293
ENSG00000157077|protein_coding|ZFYVE9	-1.04943	2.18406	-13.6436	1.15515e-36	2.51707e-35	72.2967
ENSG00000012822|protein_coding|CALCOCO1	-1.07808	3.30964	-13.632	1.30103e-36	2.83086e-35	72.1785
ENSG00000103202|protein_coding|NME4	1.32667	4.46457	13.6229	1.42774e-36	3.10211e-35	72.0861
ENSG00000126787|protein_coding|DLGAP5	1.80814	2.02004	13.618	1.50044e-36	3.2554e-35	72.0367
ENSG00000171522|protein_coding|PTGER4	-1.42975	2.19329	-13.6166	1.52236e-36	3.29823e-35	72.0223
ENSG00000119457|protein_coding|SLC46A2	-1.96425	1.40687	-13.6086	1.65218e-36	3.56927e-35	71.941
ENSG00000175899|protein_coding|A2M	-2.04688	7.30285	-13.5919	1.95868e-36	4.2254e-35	71.7718
ENSG00000156970|protein_coding|BUB1B	1.57277	1.78239	13.584	2.12348e-36	4.57439e-35	71.6915
ENSG00000037897|protein_coding|METTL1	1.16468	3.18014	13.5793	2.22752e-36	4.78401e-35	71.644
ENSG00000163431|protein_coding|LMOD1	-1.58931	2.39206	-13.5664	2.54163e-36	5.44419e-35	71.5129
ENSG00000108622|protein_coding|ICAM2	-1.11868	2.23347	-13.5624	2.64643e-36	5.66068e-35	71.4727
ENSG00000106367|protein_coding|AP1S1	1.1266	5.13121	13.5601	2.70936e-36	5.78711e-35	71.4493
ENSG00000117791|protein_coding|MTARC2	-1.41011	2.8943	-13.5574	2.78453e-36	5.93929e-35	71.4221
ENSG00000261236|protein_coding|BOP1	1.46082	3.85968	13.5572	2.79059e-36	5.94383e-35	71.42
ENSG00000101916|protein_coding|TLR8	-1.37181	1.43034	-13.5546	2.86483e-36	6.08485e-35	71.3939
ENSG00000197872|protein_coding|CYRIA	-1.21445	2.08407	-13.5456	3.14053e-36	6.6611e-35	71.3025
ENSG00000196814|protein_coding|MVB12B	-1.21496	2.09815	-13.5386	3.37247e-36	7.14303e-35	71.2317
ENSG00000111602|protein_coding|TIMELESS	1.34226	2.93834	13.5339	3.53627e-36	7.4795e-35	71.1846
ENSG00000111206|protein_coding|FOXM1	1.99166	2.49064	13.5303	3.67005e-36	7.75163e-35	71.1477
ENSG00000136404|protein_coding|TM6SF1	-1.00521	1.3252	-13.5233	3.93903e-36	8.30372e-35	71.0774
ENSG00000164611|protein_coding|PTTG1	1.77537	3.25502	13.5232	3.9424e-36	8.30372e-35	71.0765
ENSG00000138207|protein_coding|RBP4	-2.35185	1.96868	-13.5115	4.4416e-36	9.34216e-35	70.958
ENSG00000142973|protein_coding|CYP4B1	-3.76602	3.87369	-13.5105	4.48681e-36	9.42416e-35	70.948
ENSG00000167513|protein_coding|CDT1	1.63786	2.21262	13.5081	4.60093e-36	9.65049e-35	70.923
ENSG00000159713|protein_coding|TPPP3	-2.66657	3.66461	-13.5063	4.68423e-36	9.81161e-35	70.9052
ENSG00000018280|protein_coding|SLC11A1	-1.53993	2.22681	-13.5046	4.7669e-36	9.97099e-35	70.8878
ENSG00000117724|protein_coding|CENPF	1.75188	2.04084	13.4921	5.40973e-36	1.12689e-34	70.7621
ENSG00000168685|protein_coding|IL7R	-2.01076	3.2034	-13.4833	5.9167e-36	1.22743e-34	70.673
ENSG00000113368|protein_coding|LMNB1	1.56695	3.4524	13.4691	6.83487e-36	1.41403e-34	70.5296
ENSG00000123485|protein_coding|HJURP	1.77398	1.91706	13.4619	7.3567e-36	1.51785e-34	70.4565
ENSG00000090530|protein_coding|P3H2	-2.23051	2.38371	-13.4613	7.40298e-36	1.52532e-34	70.4503
ENSG00000165304|protein_coding|MELK	1.85519	2.12242	13.4574	7.69478e-36	1.58328e-34	70.4119
ENSG00000121797|protein_coding|CCRL2	-1.27104	1.81746	-13.4572	7.71428e-36	1.58514e-34	70.4094
ENSG00000100234|protein_coding|TIMP3	-1.53495	1.76904	-13.4529	8.05487e-36	1.65065e-34	70.3664
ENSG00000186074|protein_coding|CD300LF	-1.61273	2.3265	-13.4461	8.63568e-36	1.7649e-34	70.2972
ENSG00000181649|protein_coding|PHLDA2	2.17202	4.43578	13.4414	9.05701e-36	1.84851e-34	70.2499
ENSG00000168393|protein_coding|DTYMK	1.1738	3.62762	13.4336	9.80559e-36	1.99591e-34	70.1709
ENSG00000149925|protein_coding|ALDOA	1.20512	7.61923	13.429	1.02656e-35	2.08394e-34	70.1254
ENSG00000111669|protein_coding|TPI1	1.12898	7.50044	13.4279	1.0387e-35	2.10577e-34	70.1137
ENSG00000146670|protein_coding|CDCA5	1.78491	2.33809	13.4199	1.12604e-35	2.27674e-34	70.0335
ENSG00000065675|protein_coding|PRKCQ	-1.14558	1.33632	-13.4146	1.18884e-35	2.39412e-34	69.9795
ENSG00000159166|protein_coding|LAD1	1.80077	5.17623	13.4077	1.27427e-35	2.55935e-34	69.9106
ENSG00000106089|protein_coding|STX1A	1.64379	2.10473	13.405	1.30979e-35	2.62721e-34	69.8832
ENSG00000151725|protein_coding|CENPU	1.51841	2.3341	13.4023	1.34657e-35	2.69742e-34	69.8557
ENSG00000158315|protein_coding|RHBDL2	1.45384	1.94778	13.3996	1.38297e-35	2.76666e-34	69.8292
ENSG00000062716|protein_coding|VMP1	1.24521	5.09853	13.393	1.47891e-35	2.95081e-34	69.7625
ENSG00000159259|protein_coding|CHAF1B	1.06757	1.68158	13.3692	1.88245e-35	3.75103e-34	69.5228
ENSG00000124787|protein_coding|RPP40	1.00811	1.90937	13.368	1.90535e-35	3.79167e-34	69.5108
ENSG00000237649|protein_coding|KIFC1	1.82296	2.65691	13.3665	1.93354e-35	3.84271e-34	69.4962
ENSG00000103710|protein_coding|RASL12	-1.32349	2.45246	-13.3654	1.95596e-35	3.88217e-34	69.4847
ENSG00000131153|protein_coding|GINS2	1.47074	1.87176	13.3627	2.01075e-35	3.9857e-34	69.4572
ENSG00000074527|protein_coding|NTN4	-1.72962	3.68235	-13.3608	2.04858e-35	4.05539e-34	69.4387
ENSG00000162063|protein_coding|CCNF	1.14268	1.85778	13.3587	2.0932e-35	4.13831e-34	69.4173
ENSG00000173599|protein_coding|PC	1.32247	2.69193	13.3433	2.44533e-35	4.81561e-34	69.2628
ENSG00000155066|protein_coding|PROM2	1.99525	3.46057	13.3293	2.81749e-35	5.54131e-34	69.122
ENSG00000148773|protein_coding|MKI67	1.83572	2.34424	13.3167	3.20135e-35	6.27184e-34	68.9951
ENSG00000012779|protein_coding|ALOX5	-1.82577	3.80015	-13.3145	3.27124e-35	6.40048e-34	68.9736
ENSG00000116191|protein_coding|RALGPS2	1.09771	2.07675	13.3135	3.3059e-35	6.45162e-34	68.9631
ENSG00000064042|protein_coding|LIMCH1	-1.65273	3.83311	-13.3066	3.54411e-35	6.9076e-34	68.894
ENSG00000162614|protein_coding|NEXN	-1.22646	1.89265	-13.3064	3.54896e-35	6.90816e-34	68.8926
ENSG00000104522|protein_coding|GFUS	1.27843	4.78108	13.3051	3.59915e-35	6.99686e-34	68.8787
ENSG00000188906|protein_coding|LRRK2	-2.5144	2.61317	-13.2987	3.8378e-35	7.45124e-34	68.8149
ENSG00000108821|protein_coding|COL1A1	2.82498	7.34176	13.2953	3.97085e-35	7.68002e-34	68.781
ENSG00000122042|protein_coding|UBL3	-1.08393	4.14287	-13.2799	4.6387e-35	8.93747e-34	68.6265
ENSG00000087586|protein_coding|AURKA	1.77831	2.73881	13.2766	4.79709e-35	9.23089e-34	68.5932
ENSG00000160949|protein_coding|TONSL	1.23265	1.87521	13.2471	6.45356e-35	1.234e-33	68.2984
ENSG00000114346|protein_coding|ECT2	1.59819	3.02963	13.2457	6.54565e-35	1.25003e-33	68.2843
ENSG00000168079|protein_coding|SCARA5	-1.73513	1.02397	-13.2215	8.3517e-35	1.58693e-33	68.0422
ENSG00000149418|protein_coding|ST14	1.44342	5.93072	13.2105	9.32829e-35	1.76806e-33	67.9323
ENSG00000072571|protein_coding|HMMR	1.54171	1.89419	13.2064	9.72769e-35	1.83915e-33	67.8906
ENSG00000123473|protein_coding|STIL	1.04222	1.30516	13.2048	9.88558e-35	1.86435e-33	67.8746
ENSG00000116005|protein_coding|PCYOX1	-1.03274	4.55549	-13.2043	9.92834e-35	1.87008e-33	67.8704
ENSG00000109906|protein_coding|ZBTB16	-1.38631	0.807842	-13.2035	1.00105e-34	1.88321e-33	67.8622
ENSG00000091651|protein_coding|ORC6	1.12898	1.27911	13.2031	1.00513e-34	1.88855e-33	67.8581
ENSG00000180879|protein_coding|SSR4	1.32642	5.87243	13.1886	1.16302e-34	2.17441e-33	67.7131
ENSG00000256269|protein_coding|HMBS	1.012	2.84823	13.1831	1.22906e-34	2.29506e-33	67.6583
ENSG00000163362|protein_coding|INAVA	1.5994	2.83199	13.1759	1.32177e-34	2.45908e-33	67.586
ENSG00000204592|protein_coding|HLA-E	-1.32628	8.24612	-13.1747	1.33736e-34	2.48503e-33	67.5743
ENSG00000102265|protein_coding|TIMP1	1.6149	7.95855	13.1712	1.38496e-34	2.57033e-33	67.5396
ENSG00000143228|protein_coding|NUF2	1.66735	1.8364	13.1596	1.55643e-34	2.88502e-33	67.4236
ENSG00000213088|protein_coding|ACKR1	-2.24205	2.57597	-13.1589	1.56707e-34	2.90119e-33	67.4168
ENSG00000119280|protein_coding|C1orf198	-1.12355	4.57456	-13.1544	1.63956e-34	3.03168e-33	67.3719
ENSG00000114378|protein_coding|HYAL1	-2.14259	2.51773	-13.1481	1.74752e-34	3.22345e-33	67.3085
ENSG00000132965|protein_coding|ALOX5AP	-2.05508	4.4712	-13.1427	1.84413e-34	3.39751e-33	67.2551
ENSG00000154319|protein_coding|FAM167A	-1.73447	1.68343	-13.1101	2.55757e-34	4.67777e-33	66.9301
ENSG00000105220|protein_coding|GPI	1.10106	5.20395	13.0928	3.04237e-34	5.55105e-33	66.7576
ENSG00000133574|protein_coding|GIMAP4	-1.47469	3.88262	-13.0879	3.1925e-34	5.81096e-33	66.7098
ENSG00000152818|protein_coding|UTRN	-1.30451	3.1095	-13.0842	3.31489e-34	6.01927e-33	66.6724
ENSG00000177464|protein_coding|GPR4	-1.05287	1.7175	-13.0804	3.44385e-34	6.23847e-33	66.6345
ENSG00000079819|protein_coding|EPB41L2	-1.23946	2.40825	-13.073	3.70737e-34	6.69981e-33	66.5612
ENSG00000148339|protein_coding|SLC25A25	-1.15989	2.57824	-13.0687	3.87221e-34	6.98936e-33	66.518
ENSG00000161929|protein_coding|SCIMP	-1.19741	1.56631	-13.0506	4.63903e-34	8.35356e-33	66.3385
ENSG00000106105|protein_coding|GARS1	1.01372	4.89819	13.0429	5.00785e-34	8.98566e-33	66.2625
ENSG00000204136|protein_coding|GGTA1	-1.043	1.55692	-13.0424	5.03635e-34	9.02609e-33	66.2568
ENSG00000240184|protein_coding|PCDHGC3	-1.26542	1.8995	-13.0353	5.40422e-34	9.67394e-33	66.1868
ENSG00000116701|protein_coding|NCF2	-1.66148	3.91182	-13.0326	5.55462e-34	9.93143e-33	66.1595
ENSG00000129235|protein_coding|TXNDC17	1.44613	4.10557	13.0172	6.47446e-34	1.15488e-32	66.0073
ENSG00000235173|protein_coding|HGH1	1.06175	3.61802	13.012	6.82364e-34	1.2143e-32	65.9551
ENSG00000121152|protein_coding|NCAPH	1.61597	2.0153	13.0031	7.45197e-34	1.32301e-32	65.8676
ENSG00000173482|protein_coding|PTPRM	-1.32012	2.6593	-12.9858	8.85519e-34	1.56846e-32	65.6962
ENSG00000172201|protein_coding|ID4	-2.00639	2.87329	-12.9828	9.12387e-34	1.61416e-32	65.6665
ENSG00000184500|protein_coding|PROS1	-1.57091	3.41784	-12.9785	9.52228e-34	1.68268e-32	65.624
ENSG00000120457|protein_coding|KCNJ5	-1.31892	1.16256	-12.9747	9.89236e-34	1.74604e-32	65.5861
ENSG00000137960|protein_coding|GIPC2	-1.08698	0.795018	-12.9615	1.12843e-33	1.98248e-32	65.4553
ENSG00000185565|protein_coding|LSAMP	-1.00358	1.13675	-12.9494	1.27275e-33	2.23344e-32	65.3358
ENSG00000093009|protein_coding|CDC45	1.5729	1.87181	12.9469	1.30576e-33	2.28871e-32	65.3103
ENSG00000129173|protein_coding|E2F8	1.18105	1.31717	12.9374	1.43445e-33	2.50557e-32	65.2169
ENSG00000140525|protein_coding|FANCI	1.23818	2.07463	12.9223	1.66646e-33	2.90748e-32	65.068
ENSG00000178826|protein_coding|TMEM139	-1.80034	1.58047	-12.9181	1.73777e-33	3.0284e-32	65.0264
ENSG00000143314|protein_coding|MRPL24	1.07862	5.10369	12.9142	1.80709e-33	3.14558e-32	64.9875
ENSG00000150753|protein_coding|CCT5	1.18338	5.17161	12.907	1.94025e-33	3.37349e-32	64.9169
ENSG00000161888|protein_coding|SPC24	1.34672	1.73312	12.8904	2.28838e-33	3.94707e-32	64.7529
ENSG00000075218|protein_coding|GTSE1	1.35816	1.56321	12.8879	2.34709e-33	4.03913e-32	64.7278
ENSG00000205002|protein_coding|AARD	-1.30087	0.782496	-12.8821	2.48697e-33	4.27014e-32	64.6703
ENSG00000171004|protein_coding|HS6ST2	2.22291	2.65259	12.8718	2.75264e-33	4.71917e-32	64.5694
ENSG00000099953|protein_coding|MMP11	2.85615	2.95944	12.8718	2.75472e-33	4.71917e-32	64.5687
ENSG00000127528|protein_coding|KLF2	-1.73049	3.62075	-12.8674	2.87671e-33	4.91703e-32	64.5256
ENSG00000164879|protein_coding|CA3	-1.39013	1.12378	-12.8669	2.89048e-33	4.93499e-32	64.5209
ENSG00000089225|protein_coding|TBX5	-1.09934	1.57976	-12.857	3.18764e-33	5.41791e-32	64.4237
ENSG00000182134|protein_coding|TDRKH	1.09291	2.70236	12.8437	3.63887e-33	6.17101e-32	64.2922
ENSG00000111859|protein_coding|NEDD9	-1.71334	3.76529	-12.8379	3.854e-33	6.52852e-32	64.2351
ENSG00000184117|protein_coding|NIPSNAP1	1.05828	4.62908	12.8301	4.16217e-33	7.02697e-32	64.1587
ENSG00000073111|protein_coding|MCM2	1.5632	3.25627	12.8272	4.28692e-33	7.22952e-32	64.1293
ENSG00000126458|protein_coding|RRAS	-1.30334	5.42001	-12.8208	4.56619e-33	7.67485e-32	64.0666
ENSG00000177791|protein_coding|MYOZ1	-1.29899	1.13419	-12.8207	4.57142e-33	7.67512e-32	64.0655
ENSG00000143324|protein_coding|XPR1	1.54941	3.93856	12.8131	4.9276e-33	8.2457e-32	63.991
ENSG00000158270|protein_coding|COLEC12	-1.78806	2.64846	-12.8126	4.95344e-33	8.2798e-32	63.9858
ENSG00000127564|protein_coding|PKMYT1	1.28929	1.49816	12.8077	5.19767e-33	8.66889e-32	63.938
ENSG00000162747|protein_coding|FCGR3B	-1.23106	0.836719	-12.7975	5.7517e-33	9.58237e-32	63.8374
ENSG00000120833|protein_coding|SOCS2	-1.60173	1.99164	-12.7891	6.24663e-33	1.03613e-31	63.7554
ENSG00000131462|protein_coding|TUBG1	1.10091	4.13549	12.7878	6.32869e-33	1.04745e-31	63.7424
ENSG00000155465|protein_coding|SLC7A7	-1.36434	2.99326	-12.7768	7.0583e-33	1.16312e-31	63.634
ENSG00000085514|protein_coding|PILRA	-1.38666	2.69911	-12.7743	7.23023e-33	1.19016e-31	63.6101
ENSG00000186340|protein_coding|THBS2	2.35111	4.30776	12.769	7.62272e-33	1.25204e-31	63.5576
ENSG00000130755|protein_coding|GMFG	-1.42466	3.96962	-12.7623	8.14277e-33	1.33025e-31	63.492
ENSG00000254726|protein_coding|MEX3A	1.8934	2.02102	12.7573	8.5575e-33	1.39349e-31	63.4427
ENSG00000198380|protein_coding|GFPT1	1.04956	4.29675	12.7444	9.7168e-33	1.57718e-31	63.3165
ENSG00000133466|protein_coding|C1QTNF6	1.39656	2.13742	12.7438	9.77286e-33	1.58289e-31	63.3108
ENSG00000168743|protein_coding|NPNT	-2.12184	3.49762	-12.7231	1.19986e-32	1.93924e-31	63.107
ENSG00000110328|protein_coding|GALNT18	-1.33585	3.16368	-12.72	1.23645e-32	1.98988e-31	63.0771
ENSG00000115380|protein_coding|EFEMP1	-1.86161	4.70589	-12.7176	1.26622e-32	2.03563e-31	63.0535
ENSG00000176890|protein_coding|TYMS	1.46703	3.06966	12.7045	1.44097e-32	2.3092e-31	62.9251
ENSG00000106004|protein_coding|HOXA5	-1.26773	2.02466	-12.6981	1.5353e-32	2.45777e-31	62.8621
ENSG00000113460|protein_coding|BRIX1	1.03215	3.13055	12.6879	1.69653e-32	2.70929e-31	62.7629
ENSG00000165480|protein_coding|SKA3	1.29138	1.45928	12.6812	1.81353e-32	2.88489e-31	62.6967
ENSG00000144354|protein_coding|CDCA7	1.8435	2.43432	12.6773	1.88279e-32	2.99191e-31	62.6594
ENSG00000119431|protein_coding|HDHD3	1.09346	3.77762	12.6724	1.97687e-32	3.13812e-31	62.611
ENSG00000146376|protein_coding|ARHGAP18	-1.1253	3.6134	-12.6722	1.98112e-32	3.14158e-31	62.6089
ENSG00000156298|protein_coding|TSPAN7	-2.27371	2.71429	-12.67	2.02399e-32	3.20621e-31	62.5876
ENSG00000124785|protein_coding|NRN1	-1.62277	1.98704	-12.6188	3.3501e-32	5.2411e-31	62.0871
ENSG00000196684|protein_coding|HSH2D	1.18586	2.75659	12.6017	3.96059e-32	6.18342e-31	61.9208
ENSG00000250722|protein_coding|SELENOP	-1.84259	4.03089	-12.5974	4.13296e-32	6.44588e-31	61.8785
ENSG00000197785|protein_coding|ATAD3A	1.05352	3.14261	12.5917	4.37062e-32	6.80254e-31	61.823
ENSG00000125740|protein_coding|FOSB	-3.29263	3.19483	-12.586	4.62111e-32	7.17765e-31	61.7677
ENSG00000013810|protein_coding|TACC3	1.30668	2.89093	12.5831	4.75141e-32	7.36493e-31	61.74
ENSG00000124602|protein_coding|UNC5CL	1.73093	2.18795	12.5738	5.20779e-32	8.04763e-31	61.6489
ENSG00000241399|protein_coding|CD302	-1.3018	2.21481	-12.561	5.90604e-32	9.08954e-31	61.524
ENSG00000136153|protein_coding|LMO7	-1.40508	4.105	-12.5562	6.18694e-32	9.51219e-31	61.4778
ENSG00000169258|protein_coding|GPRIN1	1.24746	1.55978	12.5557	6.22038e-32	9.55389e-31	61.4725
ENSG00000127920|protein_coding|GNG11	-1.79219	3.48903	-12.5554	6.23806e-32	9.57135e-31	61.4697
ENSG00000239697|protein_coding|TNFSF12	-1.10355	3.92804	-12.5521	6.44228e-32	9.87469e-31	61.4377
ENSG00000113594|protein_coding|LIFR	-1.55862	2.6534	-12.5519	6.45433e-32	9.88315e-31	61.4358
ENSG00000135451|protein_coding|TROAP	1.62755	1.75565	12.5509	6.51994e-32	9.97354e-31	61.4258
ENSG00000166557|protein_coding|TMED3	1.00976	2.90927	12.5475	6.7406e-32	1.03007e-30	61.3927
ENSG00000198682|protein_coding|PAPSS2	-1.58799	4.34694	-12.5445	6.93897e-32	1.05931e-30	61.3639
ENSG00000113389|protein_coding|NPR3	-1.33449	1.57247	-12.5437	6.99397e-32	1.06663e-30	61.3561
ENSG00000161179|protein_coding|YDJC	1.11768	3.60372	12.5425	7.07276e-32	1.07756e-30	61.3449
ENSG00000124615|protein_coding|MOCS1	-1.04519	1.83091	-12.528	8.15728e-32	1.2403e-30	61.2033
ENSG00000125848|protein_coding|FLRT3	-1.98947	3.03594	-12.5233	8.5382e-32	1.29542e-30	61.1579
ENSG00000165474|protein_coding|GJB2	2.56565	2.93478	12.5232	8.54548e-32	1.29542e-30	61.1571
ENSG00000169583|protein_coding|CLIC3	-2.2527	3.7241	-12.5177	9.01719e-32	1.36284e-30	61.1037
ENSG00000242612|protein_coding|DECR2	1.05922	2.55887	12.5091	9.81041e-32	1.47977e-30	61.02
ENSG00000178878|protein_coding|APOLD1	-1.31036	1.92802	-12.5056	1.01536e-31	1.53002e-30	60.9858
ENSG00000164087|protein_coding|POC1A	1.0939	2.21482	12.5054	1.01708e-31	1.53108e-30	60.9842
ENSG00000173207|protein_coding|CKS1B	1.39526	3.42513	12.4874	1.21331e-31	1.81745e-30	60.809
ENSG00000120693|protein_coding|SMAD9	-1.19164	1.25957	-12.4817	1.28253e-31	1.91734e-30	60.7539
ENSG00000184445|protein_coding|KNTC1	1.10911	1.65907	12.4777	1.33271e-31	1.98844e-30	60.7158
ENSG00000135929|protein_coding|CYP27A1	-1.77696	4.4248	-12.4772	1.33934e-31	1.99636e-30	60.7108
ENSG00000099994|protein_coding|SUSD2	-3.14454	4.2555	-12.4657	1.49872e-31	2.22734e-30	60.5992
ENSG00000080986|protein_coding|NDC80	1.46705	1.75014	12.4632	1.5362e-31	2.2808e-30	60.5746
ENSG00000124191|protein_coding|TOX2	-1.23125	1.669	-12.4626	1.54464e-31	2.29109e-30	60.5692
ENSG00000106077|protein_coding|ABHD11	1.31326	4.30254	12.4561	1.64579e-31	2.43873e-30	60.5062
ENSG00000159055|protein_coding|MIS18A	1.02588	2.92306	12.4536	1.68652e-31	2.49665e-30	60.4819
ENSG00000220205|protein_coding|VAMP2	-1.07497	4.27192	-12.4366	1.99177e-31	2.93991e-30	60.3167
ENSG00000111077|protein_coding|TNS2	-1.31916	3.41673	-12.4323	2.07618e-31	3.05852e-30	60.2755
ENSG00000116649|protein_coding|SRM	1.06048	4.97393	12.4219	2.29644e-31	3.37643e-30	60.1754
ENSG00000165795|protein_coding|NDRG2	-1.43757	2.60497	-12.3921	3.06943e-31	4.47818e-30	59.8873
ENSG00000117593|protein_coding|DARS2	1.03412	3.27335	12.3893	3.15625e-31	4.6004e-30	59.8596
ENSG00000170312|protein_coding|CDK1	1.68994	2.82953	12.3884	3.18413e-31	4.63658e-30	59.8508
ENSG00000077348|protein_coding|EXOSC5	1.1078	3.7114	12.3747	3.63598e-31	5.27426e-30	59.7191
ENSG00000103257|protein_coding|SLC7A5	2.10923	4.16105	12.3718	3.74134e-31	5.4219e-30	59.6907
ENSG00000160883|protein_coding|HK3	-1.64776	2.40867	-12.3656	3.97284e-31	5.74639e-30	59.6311
ENSG00000118407|protein_coding|FILIP1	-1.28595	1.3887	-12.3481	4.7085e-31	6.77165e-30	59.4624
ENSG00000104524|protein_coding|PYCR3	1.113	2.85432	12.3438	4.90688e-31	7.04358e-30	59.4214
ENSG00000123342|protein_coding|MMP19	-1.48627	2.20879	-12.3318	5.5169e-31	7.91174e-30	59.3051
ENSG00000100522|protein_coding|GNPNAT1	1.19171	3.25238	12.3288	5.67893e-31	8.1364e-30	59.2763
ENSG00000131370|protein_coding|SH3BP5	-1.12487	2.01715	-12.326	5.83677e-31	8.34675e-30	59.2491
ENSG00000076003|protein_coding|MCM6	1.26118	3.61138	12.3249	5.8952e-31	8.42234e-30	59.2392
ENSG00000185033|protein_coding|SEMA4B	1.47323	4.5775	12.324	5.94991e-31	8.4925e-30	59.23
ENSG00000163918|protein_coding|RFC4	1.27584	2.60138	12.3231	5.99974e-31	8.53947e-30	59.2218
ENSG00000006453|protein_coding|BAIAP2L1	1.13864	4.15832	12.3135	6.58826e-31	9.35076e-30	59.1288
ENSG00000167767|protein_coding|KRT80	1.90653	3.4067	12.3122	6.66803e-31	9.45512e-30	59.1169
ENSG00000148175|protein_coding|STOM	-1.27762	6.38264	-12.3093	6.86139e-31	9.72019e-30	59.0885
ENSG00000119508|protein_coding|NR4A3	-1.67794	1.45081	-12.3059	7.09138e-31	1.00366e-29	59.0558
ENSG00000179914|protein_coding|ITLN1	-2.07483	0.77535	-12.3006	7.46513e-31	1.05557e-29	59.0048
ENSG00000158402|protein_coding|CDC25C	1.06621	1.10185	12.2934	8.00043e-31	1.12916e-29	58.936
ENSG00000168542|protein_coding|COL3A1	2.41809	7.49701	12.2854	8.64316e-31	1.21671e-29	58.8593
ENSG00000108846|protein_coding|ABCC3	2.08463	4.19909	12.2854	8.6449e-31	1.21671e-29	58.8591
ENSG00000137168|protein_coding|PPIL1	1.02595	4.30184	12.2798	9.12674e-31	1.28215e-29	58.8052
ENSG00000116128|protein_coding|BCL9	1.11412	3.03104	12.2695	1.00816e-30	1.41235e-29	58.7064
ENSG00000171051|protein_coding|FPR1	-1.62871	2.53605	-12.2692	1.01126e-30	1.4154e-29	58.7034
ENSG00000112232|protein_coding|KHDRBS2	-1.27737	0.886147	-12.2601	1.10445e-30	1.54297e-29	58.6159
ENSG00000150938|protein_coding|CRIM1	-1.33999	3.64374	-12.2522	1.19261e-30	1.6646e-29	58.5396
ENSG00000186185|protein_coding|KIF18B	1.4843	1.57445	12.2405	1.3349e-30	1.85806e-29	58.4277
ENSG00000163406|protein_coding|SLC15A2	-1.5982	2.2667	-12.2344	1.41611e-30	1.96749e-29	58.3691
ENSG00000100526|protein_coding|CDKN3	1.62755	2.12912	12.2152	1.70408e-30	2.36107e-29	58.1853
ENSG00000181409|protein_coding|AATK	-1.50534	1.49876	-12.2057	1.8675e-30	2.57572e-29	58.0944
ENSG00000143870|protein_coding|PDIA6	1.04314	6.03044	12.2042	1.89464e-30	2.61077e-29	58.08
ENSG00000102934|protein_coding|PLLP	-1.39961	2.1348	-12.2011	1.95333e-30	2.68921e-29	58.0498
ENSG00000110876|protein_coding|SELPLG	-1.46351	3.98834	-12.1974	2.02347e-30	2.78003e-29	58.0147
ENSG00000188486|protein_coding|H2AX	1.24363	4.58865	12.1973	2.02481e-30	2.78003e-29	58.0141
ENSG00000174371|protein_coding|EXO1	1.31709	1.41634	12.1945	2.0798e-30	2.84264e-29	57.9875
ENSG00000039523|protein_coding|RIPOR1	-1.10247	3.22699	-12.194	2.08983e-30	2.85378e-29	57.9827
ENSG00000147251|protein_coding|DOCK11	-1.18579	2.22702	-12.1883	2.20918e-30	3.01132e-29	57.9276
ENSG00000251322|protein_coding|SHANK3	-1.05618	2.12577	-12.1765	2.47369e-30	3.35978e-29	57.8153
ENSG00000143554|protein_coding|SLC27A3	-1.16632	2.87608	-12.1732	2.5556e-30	3.46792e-29	57.7829
ENSG00000173137|protein_coding|ADCK5	1.17756	2.39928	12.172	2.58477e-30	3.4981e-29	57.7717
ENSG00000067057|protein_coding|PFKP	1.80543	4.65127	12.1667	2.71857e-30	3.67261e-29	57.7216
ENSG00000169679|protein_coding|BUB1	1.4518	1.9743	12.1639	2.79294e-30	3.76973e-29	57.6948
ENSG00000146242|protein_coding|TPBG	1.26591	2.58707	12.1599	2.90282e-30	3.91455e-29	57.6565
ENSG00000115163|protein_coding|CENPA	1.52672	1.67729	12.159	2.92977e-30	3.94737e-29	57.6473
ENSG00000100625|protein_coding|SIX4	1.13809	1.70645	12.1583	2.94987e-30	3.97092e-29	57.6405
ENSG00000189057|protein_coding|FAM111B	1.35	1.72512	12.1524	3.11983e-30	4.19225e-29	57.5849
ENSG00000144331|protein_coding|ZNF385B	-1.94169	1.53562	-12.1506	3.17519e-30	4.26286e-29	57.5674
ENSG00000116690|protein_coding|PRG4	-1.87212	1.18907	-12.1501	3.19188e-30	4.27768e-29	57.5622
ENSG00000111665|protein_coding|CDCA3	1.18834	1.34059	12.1457	3.32961e-30	4.45439e-29	57.5203
ENSG00000161955|protein_coding|TNFSF13	-1.11788	3.3933	-12.143	3.41588e-30	4.56577e-29	57.4949
ENSG00000167972|protein_coding|ABCA3	-2.58662	4.62368	-12.1369	3.62306e-30	4.83415e-29	57.4364
ENSG00000121671|protein_coding|CRY2	-1.04973	3.12877	-12.1342	3.71703e-30	4.95081e-29	57.411
ENSG00000133026|protein_coding|MYH10	-1.39689	3.67473	-12.1255	4.04219e-30	5.36973e-29	57.3277
ENSG00000125319|protein_coding|HROB	1.16856	1.44499	12.1176	4.36122e-30	5.78339e-29	57.2523
ENSG00000163072|protein_coding|NOSTRIN	-1.23735	1.78131	-12.1154	4.45585e-30	5.89855e-29	57.231
ENSG00000265107|protein_coding|GJA5	-1.48261	3.148	-12.1061	4.86869e-30	6.43381e-29	57.1431
ENSG00000163382|protein_coding|NAXE	1.10019	5.84996	12.1044	4.9498e-30	6.53529e-29	57.1267
ENSG00000112149|protein_coding|CD83	-1.44089	3.55154	-12.103	5.01705e-30	6.61831e-29	57.1133
ENSG00000160179|protein_coding|ABCG1	-1.29689	2.93686	-12.0992	5.20334e-30	6.84564e-29	57.0771
ENSG00000136295|protein_coding|TTYH3	1.33954	4.46551	12.0991	5.20746e-30	6.84564e-29	57.0763
ENSG00000148344|protein_coding|PTGES	2.1376	3.80929	12.0949	5.42461e-30	7.11874e-29	57.0357
ENSG00000130522|protein_coding|JUND	-1.28395	6.1855	-12.081	6.19903e-30	8.10691e-29	56.9032
ENSG00000165434|protein_coding|PGM2L1	1.22553	2.29609	12.0805	6.22694e-30	8.1364e-29	56.8988
ENSG00000149257|protein_coding|SERPINH1	1.13639	5.70013	12.0722	6.74154e-30	8.78605e-29	56.82
ENSG00000162817|protein_coding|C1orf115	-1.57157	2.89605	-12.0618	7.45158e-30	9.66981e-29	56.7206
ENSG00000166313|protein_coding|APBB1	-1.1759	2.36782	-12.0538	8.04101e-30	1.04258e-28	56.645
ENSG00000183615|protein_coding|FAM167B	-1.09735	2.50562	-12.0492	8.40618e-30	1.08806e-28	56.6009
ENSG00000109805|protein_coding|NCAPG	1.42756	1.66189	12.0344	9.68713e-30	1.25172e-28	56.4601
ENSG00000137486|protein_coding|ARRB1	-1.22111	3.41154	-12.0328	9.82982e-30	1.26908e-28	56.4456
ENSG00000132436|protein_coding|FIGNL1	1.00992	1.99705	12.0129	1.18959e-29	1.5306e-28	56.2562
ENSG00000198648|protein_coding|STK39	1.29565	3.73686	12.0092	1.23255e-29	1.58184e-28	56.221
ENSG00000171241|protein_coding|SHCBP1	1.13687	1.58398	12.0005	1.33855e-29	1.71353e-28	56.1391
ENSG00000189060|protein_coding|H1-0	1.15072	6.91885	11.9888	1.49671e-29	1.90953e-28	56.0283
ENSG00000137547|protein_coding|MRPL15	1.09613	5.27201	11.9732	1.73753e-29	2.21119e-28	55.8802
ENSG00000163221|protein_coding|S100A12	-1.36715	0.950908	-11.9636	1.90522e-29	2.42053e-28	55.7887
ENSG00000085999|protein_coding|RAD54L	1.19466	1.31917	11.96	1.97118e-29	2.50222e-28	55.7549
ENSG00000144824|protein_coding|PHLDB2	-1.20361	1.64476	-11.9293	2.63991e-29	3.32879e-28	55.465
ENSG00000100479|protein_coding|POLE2	1.05534	1.43824	11.9275	2.68678e-29	3.38507e-28	55.4475
ENSG00000104783|protein_coding|KCNN4	2.30989	3.38612	11.9224	2.82063e-29	3.55076e-28	55.3993
ENSG00000171940|protein_coding|ZNF217	1.14951	3.76536	11.9215	2.84328e-29	3.5763e-28	55.3913
ENSG00000183317|protein_coding|EPHA10	1.08333	1.12194	11.921	2.85667e-29	3.58718e-28	55.3867
ENSG00000258947|protein_coding|TUBB3	1.28099	1.23522	11.9197	2.894e-29	3.63105e-28	55.3738
ENSG00000187513|protein_coding|GJA4	-1.20123	2.60174	-11.9112	3.13706e-29	3.92301e-28	55.2937
ENSG00000101084|protein_coding|RAB5IF	1.10466	4.33424	11.9064	3.28502e-29	4.10127e-28	55.248
ENSG00000184730|protein_coding|APOBR	-1.38648	2.493	-11.9036	3.37158e-29	4.20587e-28	55.2222
ENSG00000124920|protein_coding|MYRF	-1.79876	1.94114	-11.8982	3.54966e-29	4.42437e-28	55.1711
ENSG00000035499|protein_coding|DEPDC1B	1.23169	1.31231	11.8796	4.23761e-29	5.25589e-28	54.9953
ENSG00000104413|protein_coding|ESRP1	1.05783	4.49369	11.8769	4.34516e-29	5.38047e-28	54.9704
ENSG00000066279|protein_coding|ASPM	1.22348	1.29237	11.8766	4.35726e-29	5.39104e-28	54.9676
ENSG00000204175|protein_coding|GPRIN2	-1.69741	2.3108	-11.8699	4.64451e-29	5.71841e-28	54.9043
ENSG00000066336|protein_coding|SPI1	-1.58206	4.30029	-11.8691	4.68267e-29	5.76071e-28	54.8961
ENSG00000126218|protein_coding|F10	-1.10254	1.2356	-11.8636	4.93007e-29	6.05032e-28	54.845
ENSG00000171163|protein_coding|ZNF692	1.31247	2.87803	11.8633	4.94579e-29	6.0647e-28	54.8419
ENSG00000070731|protein_coding|ST6GALNAC2	-1.26816	1.58366	-11.8538	5.41094e-29	6.619e-28	54.7527
ENSG00000119686|protein_coding|FLVCR2	-1.04439	2.13959	-11.8537	5.41612e-29	6.62e-28	54.7517
ENSG00000160813|protein_coding|PPP1R35	1.15447	3.84297	11.8488	5.67545e-29	6.93137e-28	54.7053
ENSG00000125845|protein_coding|BMP2	-1.80886	2.74204	-11.8458	5.83725e-29	7.12324e-28	54.6774
ENSG00000010671|protein_coding|BTK	-1.1553	2.01557	-11.8377	6.30698e-29	7.67788e-28	54.6006
ENSG00000168389|protein_coding|MFSD2A	-1.7578	3.41985	-11.8329	6.60096e-29	8.02932e-28	54.5554
ENSG00000133392|protein_coding|MYH11	-1.86562	2.62603	-11.8316	6.67698e-29	8.11526e-28	54.544
ENSG00000137819|protein_coding|PAQR5	-1.23828	1.57872	-11.8238	7.19461e-29	8.73039e-28	54.4699
ENSG00000164109|protein_coding|MAD2L1	1.30935	1.8104	11.8214	7.35737e-29	8.92073e-28	54.4477
ENSG00000011347|protein_coding|SYT7	2.13601	2.88639	11.8102	8.17857e-29	9.88478e-28	54.3427
ENSG00000050555|protein_coding|LAMC3	-1.29977	1.67503	-11.7944	9.50261e-29	1.14485e-27	54.1938
ENSG00000168078|protein_coding|PBK	1.6514	1.94146	11.7942	9.52206e-29	1.14628e-27	54.1918
ENSG00000078401|protein_coding|EDN1	-1.90942	3.54281	-11.7834	1.05407e-28	1.26588e-27	54.0909
ENSG00000178695|protein_coding|KCTD12	-1.44905	4.28346	-11.7752	1.13888e-28	1.36449e-27	54.0141
ENSG00000069535|protein_coding|MAOB	-1.61766	2.75507	-11.7677	1.22332e-28	1.46334e-27	53.9431
ENSG00000100311|protein_coding|PDGFB	-1.22279	2.8296	-11.765	1.25485e-28	1.49988e-27	53.9179
ENSG00000143578|protein_coding|CREB3L4	1.13534	3.11649	11.7623	1.28663e-28	1.53666e-27	53.893
ENSG00000173210|protein_coding|ABLIM3	-1.26802	1.73709	-11.7537	1.39531e-28	1.66514e-27	53.8126
ENSG00000122877|protein_coding|EGR2	-1.41135	2.26129	-11.7523	1.41479e-28	1.68706e-27	53.7988
ENSG00000149428|protein_coding|HYOU1	1.0967	4.97871	11.749	1.45862e-28	1.73658e-27	53.7685
ENSG00000169607|protein_coding|CKAP2L	1.18497	1.34246	11.7459	1.5028e-28	1.78778e-27	53.7389
ENSG00000120896|protein_coding|SORBS3	-1.07327	3.67319	-11.7308	1.73301e-28	2.05357e-27	53.5975
ENSG00000060140|protein_coding|STYK1	1.24397	1.66319	11.7282	1.77484e-28	2.10149e-27	53.5738
ENSG00000104889|protein_coding|RNASEH2A	1.11698	3.36653	11.7274	1.78789e-28	2.1153e-27	53.5665
ENSG00000163736|protein_coding|PPBP	-1.80726	1.08107	-11.7237	1.85265e-28	2.1885e-27	53.5312
ENSG00000104267|protein_coding|CA2	-2.05763	3.11848	-11.7183	1.94962e-28	2.30125e-27	53.4806
ENSG00000085840|protein_coding|ORC1	1.195	1.47131	11.716	1.9915e-28	2.34885e-27	53.4595
ENSG00000172731|protein_coding|LRRC20	1.02768	3.09462	11.7149	2.01171e-28	2.37084e-27	53.4495
ENSG00000149554|protein_coding|CHEK1	1.1087	1.6014	11.7123	2.06128e-28	2.42738e-27	53.4253
ENSG00000133661|protein_coding|SFTPD	-3.59071	6.20679	-11.6831	2.71359e-28	3.17333e-27	53.1525
ENSG00000051180|protein_coding|RAD51	1.05782	1.49001	11.683	2.7161e-28	3.17381e-27	53.1516
ENSG00000007129|protein_coding|CEACAM21	-1.04751	1.31771	-11.6826	2.72619e-28	3.18314e-27	53.1479
ENSG00000241839|protein_coding|PLEKHO2	-1.05592	3.82691	-11.6761	2.90005e-28	3.38354e-27	53.0866
ENSG00000115756|protein_coding|HPCAL1	-1.00141	3.82888	-11.6745	2.94415e-28	3.43235e-27	53.0716
ENSG00000085265|protein_coding|FCN1	-1.40485	1.71423	-11.6599	3.37638e-28	3.92116e-27	52.9357
ENSG00000123146|protein_coding|ADGRE5	-1.25934	4.53788	-11.6497	3.71693e-28	4.30674e-27	52.8403
ENSG00000156802|protein_coding|ATAD2	1.2946	2.66084	11.6474	3.79647e-28	4.39554e-27	52.8193
ENSG00000137807|protein_coding|KIF23	1.25323	1.67506	11.6246	4.70332e-28	5.40829e-27	52.6068
ENSG00000132688|protein_coding|NES	-1.51346	3.24015	-11.5983	6.01794e-28	6.899e-27	52.3622
ENSG00000196196|protein_coding|HRCT1	-1.17947	1.35799	-11.5956	6.17023e-28	7.06823e-27	52.3374
ENSG00000145284|protein_coding|SCD5	-1.55429	2.2364	-11.5946	6.22764e-28	7.1286e-27	52.3282
ENSG00000168275|protein_coding|COA6	1.0807	4.15649	11.5863	6.73555e-28	7.69835e-27	52.2505
ENSG00000108379|protein_coding|WNT3	1.05976	1.60212	11.5829	6.95126e-28	7.92695e-27	52.2192
ENSG00000149131|protein_coding|SERPING1	-1.46027	6.38532	-11.573	7.62742e-28	8.6719e-27	52.1271
ENSG00000182054|protein_coding|IDH2	1.11656	5.55701	11.5695	7.87999e-28	8.94562e-27	52.0948
ENSG00000170779|protein_coding|CDCA4	1.14201	2.92447	11.567	8.06563e-28	9.14951e-27	52.0717
ENSG00000203883|protein_coding|SOX18	-1.17609	2.19887	-11.5574	8.82001e-28	9.98282e-27	51.9829
ENSG00000166523|protein_coding|CLEC4E	-1.21097	1.2884	-11.5571	8.85236e-28	1.0012e-26	51.9793
ENSG00000105173|protein_coding|CCNE1	1.46216	1.73692	11.5541	9.09997e-28	1.02843e-26	51.9519
ENSG00000204839|protein_coding|MROH6	1.71975	2.98183	11.5317	1.12203e-27	1.26617e-26	51.7441
ENSG00000132170|protein_coding|PPARG	-1.51832	2.28761	-11.5169	1.28843e-27	1.44883e-26	51.6069
ENSG00000174326|protein_coding|SLC16A11	-1.17076	1.12627	-11.5168	1.28868e-27	1.44883e-26	51.6067
ENSG00000146918|protein_coding|NCAPG2	1.15135	2.19365	11.5121	1.3469e-27	1.51204e-26	51.5629
ENSG00000112312|protein_coding|GMNN	1.08013	2.87623	11.507	1.41215e-27	1.58412e-26	51.516
ENSG00000156675|protein_coding|RAB11FIP1	-1.43131	3.65149	-11.5037	1.45686e-27	1.63186e-26	51.4851
ENSG00000016402|protein_coding|IL20RA	-1.31135	1.46918	-11.5029	1.46717e-27	1.64218e-26	51.4781
ENSG00000065911|protein_coding|MTHFD2	1.33379	3.87487	11.4979	1.53734e-27	1.71439e-26	51.4317
ENSG00000114631|protein_coding|PODXL2	2.35269	3.84055	11.497	1.54982e-27	1.72704e-26	51.4237
ENSG00000101447|protein_coding|FAM83D	1.52198	2.4009	11.4962	1.56269e-27	1.7401e-26	51.4155
ENSG00000187479|protein_coding|C11orf96	-1.67285	3.57652	-11.4796	1.82402e-27	2.02514e-26	51.2621
ENSG00000111344|protein_coding|RASAL1	1.31327	1.34603	11.4711	1.9727e-27	2.18542e-26	51.1843
ENSG00000162618|protein_coding|ADGRL4	-1.03388	2.5249	-11.4494	2.4143e-27	2.65327e-26	50.9839
ENSG00000071539|protein_coding|TRIP13	1.59014	2.36256	11.4356	2.74617e-27	3.00492e-26	50.8562
ENSG00000136026|protein_coding|CKAP4	1.04502	5.24642	11.4222	3.11011e-27	3.39333e-26	50.7327
ENSG00000105699|protein_coding|LSR	1.28221	6.17497	11.4184	3.22023e-27	3.51049e-26	50.6982
ENSG00000176014|protein_coding|TUBB6	-1.33068	3.64522	-11.4183	3.22212e-27	3.51049e-26	50.6976
ENSG00000006118|protein_coding|TMEM132A	1.48369	2.81336	11.4128	3.39213e-27	3.69306e-26	50.6466
ENSG00000171631|protein_coding|P2RY6	1.59894	2.05118	11.4042	3.67348e-27	3.98505e-26	50.5676
ENSG00000152253|protein_coding|SPC25	1.1573	1.59527	11.3976	3.90392e-27	4.22292e-26	50.5072
ENSG00000111412|protein_coding|SPRING1	-1.00169	3.58861	-11.3965	3.94723e-27	4.26369e-26	50.4963
ENSG00000008441|protein_coding|NFIX	-1.58481	3.61214	-11.3939	4.04344e-27	4.36138e-26	50.4724
ENSG00000183688|protein_coding|RFLNB	-1.05651	2.58869	-11.393	4.07608e-27	4.39346e-26	50.4644
ENSG00000143476|protein_coding|DTL	1.15094	1.86862	11.3826	4.48791e-27	4.82363e-26	50.3689
ENSG00000161544|protein_coding|CYGB	-1.02554	2.66384	-11.3798	4.60813e-27	4.94582e-26	50.3427
ENSG00000115641|protein_coding|FHL2	1.67365	2.9516	11.3715	4.97609e-27	5.33318e-26	50.2665
ENSG00000171368|protein_coding|TPPP	-1.55123	1.9828	-11.3628	5.3912e-27	5.74694e-26	50.187
ENSG00000137491|protein_coding|SLCO2B1	-1.48315	3.21728	-11.3616	5.45263e-27	5.80285e-26	50.1758
ENSG00000118193|protein_coding|KIF14	1.00815	1.03513	11.3545	5.82238e-27	6.17466e-26	50.1107
ENSG00000173376|protein_coding|NDNF	-2.29806	3.97326	-11.3522	5.9455e-27	6.30082e-26	50.09
ENSG00000124664|protein_coding|SPDEF	2.3158	3.64656	11.3496	6.09063e-27	6.45011e-26	50.066
ENSG00000151651|protein_coding|ADAM8	1.64073	3.46504	11.3386	6.74472e-27	7.12288e-26	49.9649
ENSG00000174640|protein_coding|SLCO2A1	-1.76435	3.59117	-11.3376	6.80341e-27	7.17484e-26	49.9563
ENSG00000070669|protein_coding|ASNS	1.21896	3.00169	11.3353	6.95231e-27	7.32677e-26	49.9348
ENSG00000112742|protein_coding|TTK	1.25193	1.40981	11.3338	7.05227e-27	7.42179e-26	49.9206
ENSG00000123094|protein_coding|RASSF8	-1.20471	2.00186	-11.3295	7.33779e-27	7.71155e-26	49.8813
ENSG00000262814|protein_coding|MRPL12	1.15447	4.3749	11.3183	8.13415e-27	8.52482e-26	49.7791
ENSG00000163501|protein_coding|IHH	-1.23101	0.570459	-11.3015	9.49846e-27	9.89984e-26	49.6253
ENSG00000146731|protein_coding|CCT6A	1.00428	5.67144	11.2966	9.93874e-27	1.03445e-25	49.5803
ENSG00000056998|protein_coding|GYG2	1.2862	1.8916	11.2953	1.0057e-26	1.04532e-25	49.5686
ENSG00000165140|protein_coding|FBP1	-1.58357	5.87759	-11.2929	1.02769e-26	1.06672e-25	49.5471
ENSG00000109099|protein_coding|PMP22	-1.2277	4.65083	-11.2819	1.13774e-26	1.17771e-25	49.4462
ENSG00000100162|protein_coding|CENPM	1.23461	2.24637	11.2689	1.28268e-26	1.32412e-25	49.3273
ENSG00000099860|protein_coding|GADD45B	-1.41889	4.82244	-11.2664	1.31221e-26	1.35334e-25	49.3047
ENSG00000122852|protein_coding|SFTPA1	-4.74954	8.44655	-11.2652	1.32661e-26	1.36575e-25	49.2939
ENSG00000110446|protein_coding|SLC15A3	-1.25564	3.09791	-11.2633	1.34987e-26	1.38875e-25	49.2767
ENSG00000165905|protein_coding|LARGE2	1.75138	3.13271	11.2556	1.44963e-26	1.48936e-25	49.206
ENSG00000185022|protein_coding|MAFF	-1.0172	2.73715	-11.252	1.49815e-26	1.53817e-25	49.1733
ENSG00000112699|protein_coding|GMDS	1.08948	2.79863	11.2463	1.57952e-26	1.61733e-25	49.1209
ENSG00000127586|protein_coding|CHTF18	1.07123	1.80448	11.2388	1.69248e-26	1.73182e-25	49.0524
ENSG00000139835|protein_coding|GRTP1	1.04237	2.30772	11.2333	1.77959e-26	1.81605e-25	49.0026
ENSG00000109762|protein_coding|SNX25	-1.2164	3.06224	-11.2163	2.08082e-26	2.11206e-25	48.8475
ENSG00000169750|protein_coding|RAC3	1.60837	2.92907	11.2144	2.11616e-26	2.1465e-25	48.8308
ENSG00000106484|protein_coding|MEST	1.19183	3.77279	11.1861	2.74421e-26	2.76687e-25	48.5731
ENSG00000149021|protein_coding|SCGB1A1	-5.14799	5.14923	-11.1734	3.08395e-26	3.10321e-25	48.4573
ENSG00000196976|protein_coding|LAGE3	1.09967	4.41497	11.173	3.09344e-26	3.11069e-25	48.4543
ENSG00000101347|protein_coding|SAMHD1	-1.2098	4.69646	-11.1667	3.27693e-26	3.28866e-25	48.3971
ENSG00000160111|protein_coding|CPAMD8	-1.59121	1.76283	-11.1524	3.738e-26	3.73899e-25	48.2666
ENSG00000173848|protein_coding|NET1	1.22927	5.12562	11.1448	4.00552e-26	3.99602e-25	48.198
ENSG00000136205|protein_coding|TNS3	-1.04902	3.85574	-11.1406	4.16098e-26	4.14838e-25	48.1603
ENSG00000163563|protein_coding|MNDA	-1.49194	3.20656	-11.1244	4.82761e-26	4.80035e-25	48.0129
ENSG00000156804|protein_coding|FBXO32	1.38894	2.81595	11.1107	5.46972e-26	5.42815e-25	47.8891
ENSG00000024526|protein_coding|DEPDC1	1.17965	1.22232	11.0827	7.06052e-26	6.9931e-25	47.6359
ENSG00000065328|protein_coding|MCM10	1.11101	1.1787	11.0791	7.29718e-26	7.21806e-25	47.6033
ENSG00000047457|protein_coding|CP	2.71036	4.56415	11.071	7.85603e-26	7.76071e-25	47.5301
ENSG00000000003|protein_coding|TSPAN6	1.04153	3.80472	11.0668	8.1627e-26	8.05315e-25	47.4921
ENSG00000026025|protein_coding|VIM	-1.2735	7.16863	-11.0661	8.21711e-26	8.10156e-25	47.4855
ENSG00000152766|protein_coding|ANKRD22	1.86374	2.93273	11.062	8.52867e-26	8.3869e-25	47.4486
ENSG00000070756|protein_coding|PABPC1	1.01085	8.1471	11.0618	8.53802e-26	8.39064e-25	47.4475
ENSG00000172236|protein_coding|TPSAB1	-1.88805	3.16245	-11.0504	9.47595e-26	9.28226e-25	47.3442
ENSG00000127533|protein_coding|F2RL3	-1.082	1.39721	-11.0364	1.07641e-25	1.05304e-24	47.2178
ENSG00000171124|protein_coding|FUT3	1.63386	2.94527	11.0149	1.30832e-25	1.27106e-24	47.0244
ENSG00000137962|protein_coding|ARHGAP29	-1.01946	2.12347	-11.0137	1.32287e-25	1.2842e-24	47.0134
ENSG00000162073|protein_coding|PAQR4	1.08097	2.57879	11.0136	1.32442e-25	1.28489e-24	47.0122
ENSG00000184661|protein_coding|CDCA2	1.00305	1.14171	11.0002	1.49466e-25	1.44541e-24	46.8923
ENSG00000052802|protein_coding|MSMO1	-1.02684	4.82517	-10.9951	1.56611e-25	1.51258e-24	46.846
ENSG00000118971|protein_coding|CCND2	-1.22249	2.69235	-10.9736	1.90283e-25	1.83544e-24	46.653
ENSG00000129195|protein_coding|PIMREG	1.22833	1.40367	10.9677	2.00805e-25	1.93448e-24	46.5996
ENSG00000188706|protein_coding|ZDHHC9	1.21996	5.03608	10.9366	2.65977e-25	2.5391e-24	46.321
ENSG00000180354|protein_coding|MTURN	-1.21487	2.72877	-10.9331	2.74514e-25	2.61791e-24	46.2896
ENSG00000106025|protein_coding|TSPAN12	-1.2919	3.71474	-10.9307	2.80596e-25	2.67086e-24	46.2679
ENSG00000167553|protein_coding|TUBA1C	1.02426	4.6615	10.9218	3.03969e-25	2.88428e-24	46.1886
ENSG00000206538|protein_coding|VGLL3	-1.12721	1.47183	-10.8926	3.95533e-25	3.7251e-24	45.9276
ENSG00000123989|protein_coding|CHPF	1.19241	5.33754	10.8909	4.01863e-25	3.78001e-24	45.9118
ENSG00000154839|protein_coding|SKA1	1.13243	1.30691	10.8836	4.2896e-25	4.0199e-24	45.8471
ENSG00000185303|protein_coding|SFTPA2	-4.54269	8.70679	-10.8746	4.65326e-25	4.34994e-24	45.7665
ENSG00000099958|protein_coding|DERL3	1.69956	3.0399	10.8717	4.77449e-25	4.45776e-24	45.741
ENSG00000033170|protein_coding|FUT8	1.12459	3.15733	10.8714	4.79066e-25	4.46735e-24	45.7376
ENSG00000168734|protein_coding|PKIG	-1.17024	3.93473	-10.8697	4.86404e-25	4.53299e-24	45.7226
ENSG00000132646|protein_coding|PCNA	1.0546	5.7222	10.8518	5.71402e-25	5.29903e-24	45.5629
ENSG00000079385|protein_coding|CEACAM1	1.49891	3.08581	10.8435	6.15832e-25	5.69015e-24	45.4887
ENSG00000196611|protein_coding|MMP1	3.06501	3.68507	10.8283	7.05683e-25	6.49657e-24	45.3537
ENSG00000048740|protein_coding|CELF2	-1.20916	3.04776	-10.8253	7.24868e-25	6.66104e-24	45.3271
ENSG00000188761|protein_coding|BCL2L15	1.45712	1.65445	10.8225	7.43342e-25	6.82666e-24	45.3022
ENSG00000103569|protein_coding|AQP9	-1.46033	2.14222	-10.8213	7.51537e-25	6.89774e-24	45.2913
ENSG00000128284|protein_coding|APOL3	-1.23201	2.79659	-10.8122	8.15597e-25	7.47663e-24	45.2102
ENSG00000198053|protein_coding|SIRPA	-1.23191	3.59187	-10.8062	8.60936e-25	7.86845e-24	45.1566
ENSG00000130768|protein_coding|SMPDL3B	1.56551	4.22545	10.8019	8.94461e-25	8.16992e-24	45.1187
ENSG00000135476|protein_coding|ESPL1	1.06726	1.19704	10.7962	9.4142e-25	8.58847e-24	45.068
ENSG00000162616|protein_coding|DNAJB4	-1.07312	2.49284	-10.7941	9.58966e-25	8.73276e-24	45.0497
ENSG00000117308|protein_coding|GALE	1.01409	4.2256	10.7907	9.89078e-25	8.99615e-24	45.0191
ENSG00000136244|protein_coding|IL6	-1.84102	1.98157	-10.7884	1.00983e-24	9.17937e-24	44.9985
ENSG00000106683|protein_coding|LIMK1	1.04077	3.71868	10.7876	1.01701e-24	9.23915e-24	44.9915
ENSG00000165802|protein_coding|NSMF	1.03905	3.40156	10.777	1.11834e-24	1.01232e-23	44.8973
ENSG00000170421|protein_coding|KRT8	1.30239	7.49945	10.7767	1.12113e-24	1.01424e-23	44.8949
ENSG00000132031|protein_coding|MATN3	-1.39452	1.90282	-10.7676	1.2164e-24	1.0978e-23	44.814
ENSG00000011600|protein_coding|TYROBP	-1.57395	6.28306	-10.7643	1.25313e-24	1.12961e-23	44.7845
ENSG00000101265|protein_coding|RASSF2	-1.14765	2.82389	-10.7575	1.3312e-24	1.19784e-23	44.7246
ENSG00000103269|protein_coding|RHBDL1	1.33579	1.57445	10.7444	1.49633e-24	1.34324e-23	44.6087
ENSG00000134531|protein_coding|EMP1	-1.40615	4.10845	-10.7392	1.56786e-24	1.40662e-23	44.5625
ENSG00000121361|protein_coding|KCNJ8	-1.30921	2.52002	-10.7388	1.57415e-24	1.41143e-23	44.5585
ENSG00000111275|protein_coding|ALDH2	-1.2746	4.54224	-10.7258	1.76711e-24	1.57883e-23	44.4439
ENSG00000128228|protein_coding|SDF2L1	1.07011	4.74286	10.7095	2.0436e-24	1.81408e-23	44.2998
ENSG00000154153|protein_coding|RETREG1	-1.3437	1.79654	-10.7084	2.065e-24	1.832e-23	44.2895
ENSG00000173372|protein_coding|C1QA	-1.73824	7.11413	-10.7018	2.18912e-24	1.93985e-23	44.2317
ENSG00000107719|protein_coding|PALD1	-1.00266	2.23179	-10.7014	2.19655e-24	1.9453e-23	44.2283
ENSG00000205795|protein_coding|CYS1	-1.45083	1.46952	-10.7003	2.21852e-24	1.96245e-23	44.2184
ENSG00000137573|protein_coding|SULF1	1.91256	3.57596	10.6812	2.63083e-24	2.31098e-23	44.0495
ENSG00000154760|protein_coding|SLFN13	1.16596	2.33558	10.6633	3.08566e-24	2.69488e-23	43.8915
ENSG00000142632|protein_coding|ARHGEF19	1.26093	3.22285	10.662	3.12119e-24	2.72277e-23	43.8801
ENSG00000106992|protein_coding|AK1	-1.19907	2.91659	-10.6534	3.36977e-24	2.93455e-23	43.8042
ENSG00000164647|protein_coding|STEAP1	1.95285	3.22704	10.6476	3.54598e-24	3.07386e-23	43.7537
ENSG00000112799|protein_coding|LY86	-1.37195	3.03357	-10.6444	3.64996e-24	3.16218e-23	43.7251
ENSG00000146674|protein_coding|IGFBP3	1.95978	5.53872	10.6406	3.7737e-24	3.26192e-23	43.692
ENSG00000169255|protein_coding|B3GALNT1	-1.15961	2.10242	-10.6384	3.85058e-24	3.32269e-23	43.672
ENSG00000080031|protein_coding|PTPRH	1.68284	1.63374	10.6379	3.8667e-24	3.33418e-23	43.6679
ENSG00000158106|protein_coding|RHPN1	1.45296	2.93232	10.6378	3.8683e-24	3.33418e-23	43.6675
ENSG00000153071|protein_coding|DAB2	-1.09782	3.25946	-10.6306	4.12631e-24	3.55252e-23	43.6035
ENSG00000123338|protein_coding|NCKAP1L	-1.16768	2.46372	-10.6253	4.3242e-24	3.71866e-23	43.5571
ENSG00000240583|protein_coding|AQP1	-2.50164	6.22701	-10.6203	4.51975e-24	3.88022e-23	43.5133
ENSG00000012171|protein_coding|SEMA3B	-1.74459	2.6613	-10.6194	4.55606e-24	3.90918e-23	43.5053
ENSG00000112936|protein_coding|C7	-2.30854	3.58029	-10.6166	4.66931e-24	3.99955e-23	43.481
ENSG00000204262|protein_coding|COL5A2	1.75151	4.28407	10.5948	5.66448e-24	4.81655e-23	43.2896
ENSG00000134954|protein_coding|ETS1	-1.16051	3.95162	-10.5947	5.67029e-24	4.81879e-23	43.2885
ENSG00000065534|protein_coding|MYLK	-1.13719	2.44288	-10.5855	6.15251e-24	5.21688e-23	43.2077
ENSG00000169174|protein_coding|PCSK9	-1.70453	1.50083	-10.5811	6.39618e-24	5.41138e-23	43.1692
ENSG00000128016|protein_coding|ZFP36	-1.70517	6.74354	-10.5803	6.44043e-24	5.44578e-23	43.1623
ENSG00000133488|protein_coding|SEC14L4	-1.18719	1.31578	-10.5589	7.78751e-24	6.55554e-23	42.9742
ENSG00000177732|protein_coding|SOX12	1.08829	2.83862	10.5544	8.1003e-24	6.80748e-23	42.9351
ENSG00000111247|protein_coding|RAD51AP1	1.19595	1.96083	10.5518	8.28773e-24	6.95728e-23	42.9125
ENSG00000118523|protein_coding|CCN2	-1.66782	6.14038	-10.5501	8.41649e-24	7.06146e-23	42.8972
ENSG00000114771|protein_coding|AADAC	-1.72966	1.25831	-10.5368	9.4681e-24	7.9262e-23	42.7805
ENSG00000124126|protein_coding|PREX1	-1.0804	2.99307	-10.524	1.05953e-23	8.84055e-23	42.6691
ENSG00000068489|protein_coding|PRR11	1.28482	2.04426	10.5238	1.06156e-23	8.85258e-23	42.6672
ENSG00000168874|protein_coding|ATOH8	-1.84932	2.23228	-10.5113	1.18512e-23	9.85582e-23	42.5581
ENSG00000180921|protein_coding|FAM83H	1.10181	4.41248	10.508	1.22011e-23	1.01357e-22	42.5293
ENSG00000134247|protein_coding|PTGFRN	1.06393	3.76987	10.4953	1.36453e-23	1.12859e-22	42.4185
ENSG00000163106|protein_coding|HPGDS	-1.17987	1.50771	-10.4898	1.43238e-23	1.18277e-22	42.3704
ENSG00000120129|protein_coding|DUSP1	-1.79478	7.02955	-10.4881	1.45384e-23	1.19984e-22	42.3556
ENSG00000131187|protein_coding|F12	1.0661	1.2771	10.4852	1.492e-23	1.23066e-22	42.33
ENSG00000183644|protein_coding|HOATZ	-1.16411	0.604457	-10.4691	1.71847e-23	1.41207e-22	42.19
ENSG00000113758|protein_coding|DBN1	1.11775	4.26613	10.4675	1.74248e-23	1.43025e-22	42.1762
ENSG00000163923|protein_coding|RPL39L	1.708	3.34552	10.4658	1.76852e-23	1.45084e-22	42.1615
ENSG00000163751|protein_coding|CPA3	-2.00555	3.43614	-10.4653	1.77649e-23	1.45658e-22	42.1571
ENSG00000132205|protein_coding|EMILIN2	-1.00014	2.53944	-10.4543	1.95662e-23	1.60081e-22	42.0614
ENSG00000162104|protein_coding|ADCY9	-1.02097	2.38097	-10.449	2.04971e-23	1.67336e-22	42.0154
ENSG00000166508|protein_coding|MCM7	1.11667	4.60852	10.4478	2.07281e-23	1.6913e-22	42.0043
ENSG00000257057|protein_coding|C11orf97	-1.23421	0.623046	-10.4415	2.18985e-23	1.78584e-22	41.9498
ENSG00000106178|protein_coding|CCL24	-1.50545	1.39831	-10.4163	2.73058e-23	2.21608e-22	41.7312
ENSG00000166086|protein_coding|JAM3	-1.03158	2.26963	-10.4098	2.89061e-23	2.34218e-22	41.6748
ENSG00000164877|protein_coding|MICALL2	1.1606	2.56058	10.4052	3.01063e-23	2.43553e-22	41.6345
ENSG00000173369|protein_coding|C1QB	-1.77433	7.01137	-10.4032	3.06289e-23	2.47515e-22	41.6175
ENSG00000167123|protein_coding|CERCAM	1.20724	3.14646	10.4015	3.10825e-23	2.50913e-22	41.6029
ENSG00000135127|protein_coding|BICDL1	1.25419	2.05966	10.394	3.31941e-23	2.67105e-22	41.5378
ENSG00000166923|protein_coding|GREM1	1.69483	1.67958	10.3903	3.43117e-23	2.75951e-22	41.505
ENSG00000186198|protein_coding|SLC51B	-1.4048	1.32961	-10.3886	3.48178e-23	2.79576e-22	41.4905
ENSG00000007908|protein_coding|SELE	-1.01711	0.706609	-10.3834	3.64445e-23	2.92173e-22	41.4453
ENSG00000104415|protein_coding|CCN4	1.19719	1.79887	10.3817	3.6965e-23	2.9619e-22	41.4312
ENSG00000104341|protein_coding|LAPTM4B	1.30462	6.37527	10.3667	4.21603e-23	3.36394e-22	41.301
ENSG00000281406|protein_coding|BLACAT1	1.03845	1.20722	10.3621	4.38985e-23	3.49894e-22	41.2609
ENSG00000107317|protein_coding|PTGDS	-1.97555	4.50377	-10.3613	4.42026e-23	3.52132e-22	41.2541
ENSG00000024422|protein_coding|EHD2	-1.33348	5.25437	-10.3558	4.63532e-23	3.68296e-22	41.2071
ENSG00000111012|protein_coding|CYP27B1	1.02288	1.41197	10.3546	4.68472e-23	3.72026e-22	41.1966
ENSG00000091073|protein_coding|DTX2	1.04482	3.03045	10.3479	4.96739e-23	3.93648e-22	41.1385
ENSG00000140450|protein_coding|ARRDC4	-1.07785	2.72108	-10.3392	5.35941e-23	4.2427e-22	41.0633
ENSG00000011465|protein_coding|DCN	-1.58373	4.79076	-10.3391	5.36452e-23	4.24453e-22	41.0623
ENSG00000182985|protein_coding|CADM1	-1.60473	3.14338	-10.3352	5.55032e-23	4.3801e-22	41.0286
ENSG00000204482|protein_coding|LST1	-1.32545	3.00263	-10.3228	6.18183e-23	4.86325e-22	40.9219
ENSG00000188322|protein_coding|SBK1	1.57464	2.43093	10.3219	6.23276e-23	4.90078e-22	40.9138
ENSG00000179813|protein_coding|FAM216B	-1.68921	1.07247	-10.3208	6.28992e-23	4.94315e-22	40.9047
ENSG00000130635|protein_coding|COL5A1	1.71355	4.33672	10.3164	6.53854e-23	5.13588e-22	40.8663
ENSG00000198826|protein_coding|ARHGAP11A	1.04873	1.65031	10.2967	7.75808e-23	6.06548e-22	40.6969
ENSG00000152527|protein_coding|PLEKHH2	-1.03873	1.58979	-10.269	9.87497e-23	7.67693e-22	40.458
ENSG00000181019|protein_coding|NQO1	2.26638	5.44855	10.2688	9.88893e-23	7.68384e-22	40.4566
ENSG00000186891|protein_coding|TNFRSF18	1.55359	2.30443	10.2638	1.03306e-22	8.01883e-22	40.4133
ENSG00000101336|protein_coding|HCK	-1.36935	3.51283	-10.2629	1.04108e-22	8.07688e-22	40.4057
ENSG00000104147|protein_coding|OIP5	1.01991	1.38987	10.2578	1.08766e-22	8.4253e-22	40.3623
ENSG00000185507|protein_coding|IRF7	1.13541	4.15575	10.2037	1.73813e-22	1.33547e-21	39.8981
ENSG00000101104|protein_coding|PABPC1L	1.49459	2.60057	10.1941	1.8886e-22	1.44888e-21	39.8159
ENSG00000188783|protein_coding|PRELP	-1.62495	3.70282	-10.1897	1.96114e-22	1.50329e-21	39.7786
ENSG00000175318|protein_coding|GRAMD2A	-1.31086	2.2563	-10.1875	1.99943e-22	1.53158e-21	39.7594
ENSG00000197253|protein_coding|TPSB2	-1.92124	3.1121	-10.1629	2.47147e-22	1.87986e-21	39.5495
ENSG00000162493|protein_coding|PDPN	-1.45864	2.99446	-10.1481	2.80881e-22	2.13003e-21	39.4228
ENSG00000105427|protein_coding|CNFN	1.37645	1.90895	10.1429	2.93789e-22	2.22569e-21	39.3784
ENSG00000235568|protein_coding|NFAM1	-1.0278	1.91356	-10.1399	3.01494e-22	2.28291e-21	39.3527
ENSG00000139112|protein_coding|GABARAPL1	-1.04184	4.14973	-10.1224	3.50339e-22	2.63432e-21	39.2041
ENSG00000164972|protein_coding|C9orf24	-1.82039	1.34558	-10.1076	3.97973e-22	2.97772e-21	39.0778
ENSG00000166920|protein_coding|C15orf48	2.29583	4.37788	10.1032	4.13365e-22	3.08831e-21	39.0403
ENSG00000145569|protein_coding|OTULINL	-1.42342	3.04348	-10.0773	5.16228e-22	3.82848e-21	38.8203
ENSG00000267795|protein_coding|SMIM22	1.6008	4.23678	10.0659	5.6922e-22	4.20911e-21	38.7235
ENSG00000111057|protein_coding|KRT18	1.13128	7.63515	10.0609	5.93823e-22	4.38676e-21	38.6816
ENSG00000006468|protein_coding|ETV1	-1.21152	2.25053	-10.0608	5.94596e-22	4.39033e-21	38.6803
ENSG00000185862|protein_coding|EVI2B	-1.26028	3.66266	-10.0476	6.65591e-22	4.88595e-21	38.5687
ENSG00000116667|protein_coding|C1orf21	-1.01742	2.1819	-10.0471	6.68312e-22	4.8988e-21	38.5646
ENSG00000062038|protein_coding|CDH3	2.03553	3.52737	10.0401	7.0942e-22	5.19509e-21	38.5055
ENSG00000130176|protein_coding|CNN1	-1.2759	2.36684	-10.0262	7.99326e-22	5.83936e-21	38.3874
ENSG00000160161|protein_coding|CILP2	1.38418	1.49748	10.0257	8.02893e-22	5.85977e-21	38.383
ENSG00000198753|protein_coding|PLXNB3	1.41631	1.63477	10.01	9.17838e-22	6.65942e-21	38.2506
ENSG00000064886|protein_coding|CHI3L2	-1.69002	2.3327	-10.0077	9.35637e-22	6.77956e-21	38.2316
ENSG00000154096|protein_coding|THY1	1.38833	3.62227	9.99644	1.03038e-21	7.44116e-21	38.1361
ENSG00000161921|protein_coding|CXCL16	-1.02889	5.66591	-9.98856	1.10201e-21	7.94706e-21	38.0695
ENSG00000101457|protein_coding|DNTTIP1	1.2296	4.79162	9.9876	1.11099e-21	8.00802e-21	38.0615
ENSG00000198848|protein_coding|CES1	-2.51433	4.18136	-9.98353	1.15022e-21	8.27107e-21	38.0272
ENSG00000135916|protein_coding|ITM2C	1.15137	5.59133	9.98105	1.1748e-21	8.42385e-21	38.0062
ENSG00000244405|protein_coding|ETV5	-1.0766	3.23339	-9.97945	1.1909e-21	8.53523e-21	37.9928
ENSG00000108924|protein_coding|HLF	-1.4947	1.79628	-9.97725	1.2134e-21	8.68827e-21	37.9742
ENSG00000110628|protein_coding|SLC22A18	1.06675	2.72824	9.97618	1.22453e-21	8.76385e-21	37.9652
ENSG00000042980|protein_coding|ADAM28	1.20013	1.88422	9.97545	1.23216e-21	8.81012e-21	37.959
ENSG00000078098|protein_coding|FAP	1.16452	1.74017	9.96994	1.29137e-21	9.22478e-21	37.9126
ENSG00000128039|protein_coding|SRD5A3	1.29366	3.88046	9.96555	1.34051e-21	9.56679e-21	37.8756
ENSG00000137203|protein_coding|TFAP2A	1.16423	1.22576	9.95355	1.48466e-21	1.05657e-20	37.7745
ENSG00000147883|protein_coding|CDKN2B	-1.32774	2.7149	-9.94886	1.54501e-21	1.09899e-20	37.7351
ENSG00000183248|protein_coding|PRR36	1.35068	2.25006	9.93153	1.79001e-21	1.2691e-20	37.5894
ENSG00000158125|protein_coding|XDH	1.45672	1.5931	9.92763	1.85033e-21	1.31002e-20	37.5566
ENSG00000116133|protein_coding|DHCR24	-1.04634	7.20333	-9.91728	2.02014e-21	1.42625e-20	37.4697
ENSG00000157551|protein_coding|KCNJ15	-1.71828	2.2806	-9.91218	2.10946e-21	1.48861e-20	37.4269
ENSG00000188483|protein_coding|IER5L	1.20707	2.42973	9.90849	2.17659e-21	1.53313e-20	37.3959
ENSG00000262406|protein_coding|MMP12	2.4519	2.96381	9.90767	2.19166e-21	1.54231e-20	37.389
ENSG00000164749|protein_coding|HNF4G	1.07157	1.16653	9.89498	2.4405e-21	1.71583e-20	37.2826
ENSG00000161800|protein_coding|RACGAP1	1.0981	2.87258	9.88695	2.61212e-21	1.82969e-20	37.2153
ENSG00000104140|protein_coding|RHOV	2.1362	3.01207	9.87919	2.78942e-21	1.94668e-20	37.1504
ENSG00000168329|protein_coding|CX3CR1	-1.04292	1.17289	-9.87736	2.83295e-21	1.97342e-20	37.135
ENSG00000019102|protein_coding|VSIG2	-2.29003	3.47688	-9.87568	2.87351e-21	2.00075e-20	37.121
ENSG00000254415|protein_coding|SIGLEC14	-1.02541	1.66524	-9.87515	2.88657e-21	2.00892e-20	37.1165
ENSG00000158089|protein_coding|GALNT14	1.62245	1.87034	9.86836	3.05708e-21	2.12564e-20	37.0597
ENSG00000111452|protein_coding|ADGRD1	-1.26001	1.63516	-9.86788	3.06946e-21	2.13326e-20	37.0557
ENSG00000124143|protein_coding|ARHGAP40	1.50099	1.64516	9.8676	3.07673e-21	2.13734e-20	37.0533
ENSG00000100290|protein_coding|BIK	1.35981	2.71601	9.8628	3.2042e-21	2.22487e-20	37.0132
ENSG00000168994|protein_coding|PXDC1	-1.04301	3.90986	-9.84894	3.60229e-21	2.49329e-20	36.8973
ENSG00000081041|protein_coding|CXCL2	-1.97392	4.23494	-9.84784	3.63574e-21	2.51414e-20	36.8881
ENSG00000155926|protein_coding|SLA	-1.01093	2.36188	-9.83783	3.95626e-21	2.73079e-20	36.8045
ENSG00000107562|protein_coding|CXCL12	-1.29176	2.71619	-9.83063	4.20391e-21	2.89382e-20	36.7444
ENSG00000185090|protein_coding|MANEAL	1.24202	2.54237	9.82259	4.49888e-21	3.09125e-20	36.6773
ENSG00000108106|protein_coding|UBE2S	1.20838	2.65602	9.82145	4.54207e-21	3.11809e-20	36.6679
ENSG00000163884|protein_coding|KLF15	-1.30667	1.72205	-9.80938	5.02845e-21	3.43952e-20	36.5672
ENSG00000170373|protein_coding|CST1	2.69038	2.56126	9.80516	5.21037e-21	3.56073e-20	36.532
ENSG00000142871|protein_coding|CCN1	-1.59045	6.0397	-9.79612	5.62219e-21	3.83007e-20	36.4568
ENSG00000188372|protein_coding|ZP3	1.01139	1.5306	9.79	5.91895e-21	4.02499e-20	36.4059
ENSG00000254827|protein_coding|SLC22A18AS	1.08937	1.49877	9.78481	6.18311e-21	4.19708e-20	36.3627
ENSG00000137273|protein_coding|FOXF2	-1.13146	2.0053	-9.75361	8.0343e-21	5.41243e-20	36.1035
ENSG00000182782|protein_coding|HCAR2	-1.45219	1.83587	-9.73852	9.11802e-21	6.12342e-20	35.9783
ENSG00000162878|protein_coding|PKDCC	-1.24561	2.02986	-9.73797	9.16043e-21	6.14918e-20	35.9738
ENSG00000130598|protein_coding|TNNI2	-1.21726	1.39396	-9.72679	1.00594e-20	6.73769e-20	35.8811
ENSG00000088882|protein_coding|CPXM1	1.40285	2.35457	9.72195	1.04755e-20	6.9985e-20	35.841
ENSG00000170549|protein_coding|IRX1	-1.27073	0.854768	-9.71807	1.08208e-20	7.2253e-20	35.8089
ENSG00000156234|protein_coding|CXCL13	2.35785	3.46424	9.70953	1.16221e-20	7.70941e-20	35.7383
ENSG00000205336|protein_coding|ADGRG1	1.24634	4.18315	9.68858	1.38446e-20	9.11576e-20	35.5652
ENSG00000069011|protein_coding|PITX1	1.66313	1.69677	9.68831	1.38765e-20	9.13282e-20	35.5629
ENSG00000162772|protein_coding|ATF3	-1.5763	3.5595	-9.68669	1.40659e-20	9.24537e-20	35.5495
ENSG00000166143|protein_coding|PPP1R14D	2.53732	2.54222	9.68251	1.45651e-20	9.55693e-20	35.515
ENSG00000215788|protein_coding|TNFRSF25	1.17924	1.97113	9.68012	1.48587e-20	9.7369e-20	35.4952
ENSG00000019186|protein_coding|CYP24A1	2.67283	2.65821	9.67995	1.48798e-20	9.7465e-20	35.4938
ENSG00000183346|protein_coding|CABCOCO1	-1.19536	1.04481	-9.66333	1.70915e-20	1.11422e-19	35.3567
ENSG00000157992|protein_coding|KRTCAP3	1.31898	4.82183	9.66051	1.74978e-20	1.13973e-19	35.3335
ENSG00000182704|protein_coding|TSKU	1.34636	3.78282	9.64046	2.06763e-20	1.33985e-19	35.1684
ENSG00000167074|protein_coding|TEF	-1.00218	2.80997	-9.63806	2.1093e-20	1.36568e-19	35.1486
ENSG00000186517|protein_coding|ARHGAP30	-1.05401	3.11735	-9.63779	2.11414e-20	1.36823e-19	35.1464
ENSG00000137809|protein_coding|ITGA11	1.40642	1.82411	9.63551	2.15466e-20	1.39326e-19	35.1276
ENSG00000169439|protein_coding|SDC2	-1.159	3.46102	-9.62652	2.32183e-20	1.49752e-19	35.0537
ENSG00000158869|protein_coding|FCER1G	-1.31106	5.68112	-9.61676	2.51793e-20	1.62055e-19	34.9735
ENSG00000167858|protein_coding|TEKT1	-1.36886	0.842509	-9.60041	2.88405e-20	1.85304e-19	34.8392
ENSG00000179388|protein_coding|EGR3	-1.0842	1.40681	-9.59421	3.03612e-20	1.94332e-19	34.7884
ENSG00000095383|protein_coding|TBC1D2	-1.1009	3.87197	-9.58937	3.16062e-20	2.0213e-19	34.7486
ENSG00000130775|protein_coding|THEMIS2	-1.0011	3.48125	-9.58309	3.3294e-20	2.12744e-19	34.6972
ENSG00000136155|protein_coding|SCEL	-1.7967	3.5042	-9.57452	3.5744e-20	2.28207e-19	34.6269
ENSG00000140297|protein_coding|GCNT3	1.98173	2.04286	9.57185	3.65423e-20	2.33009e-19	34.6051
ENSG00000100985|protein_coding|MMP9	1.98306	4.33244	9.56345	3.91719e-20	2.49566e-19	34.5364
ENSG00000240972|protein_coding|MIF	1.15313	5.14974	9.56174	3.97329e-20	2.53034e-19	34.5223
ENSG00000169031|protein_coding|COL4A3	-1.31089	1.68734	-9.55789	4.10181e-20	2.61109e-19	34.4908
ENSG00000013588|protein_coding|GPRC5A	-1.53697	5.99682	-9.55502	4.20031e-20	2.67267e-19	34.4673
ENSG00000198125|protein_coding|MB	1.52094	1.82491	9.54996	4.37979e-20	2.78453e-19	34.426
ENSG00000105131|protein_coding|EPHX3	1.49936	2.83581	9.5491	4.41096e-20	2.802e-19	34.4189
ENSG00000101194|protein_coding|SLC17A9	1.38255	2.0726	9.53962	4.7702e-20	3.02386e-19	34.3415
ENSG00000123358|protein_coding|NR4A1	-1.82523	3.66292	-9.52691	5.29804e-20	3.35144e-19	34.2377
ENSG00000151715|protein_coding|TMEM45B	1.41984	3.88834	9.52163	5.53401e-20	3.49633e-19	34.1946
ENSG00000170439|protein_coding|METTL7B	1.70076	2.90515	9.49186	7.07291e-20	4.43162e-19	33.952
ENSG00000108176|protein_coding|DNAJC12	2.07937	2.4994	9.47779	7.94058e-20	4.96704e-19	33.8376
ENSG00000162654|protein_coding|GBP4	-1.37302	3.28093	-9.4545	9.61508e-20	5.975e-19	33.6483
ENSG00000118515|protein_coding|SGK1	-1.12357	3.46444	-9.44818	1.01271e-19	6.28285e-19	33.597
ENSG00000173930|protein_coding|SLCO4C1	-1.37888	1.82063	-9.43352	1.14213e-19	7.06841e-19	33.4781
ENSG00000126778|protein_coding|SIX1	1.47551	2.13896	9.42221	1.25303e-19	7.73577e-19	33.3865
ENSG00000171388|protein_coding|APLN	-1.31153	2.12953	-9.41851	1.29149e-19	7.96351e-19	33.3566
ENSG00000110400|protein_coding|NECTIN1	1.12552	2.65077	9.39961	1.50754e-19	9.25422e-19	33.2037
ENSG00000155265|protein_coding|GOLGA7B	1.33785	1.86965	9.38824	1.65435e-19	1.01349e-18	33.1118
ENSG00000167552|protein_coding|TUBA1A	-1.14022	5.35479	-9.38589	1.68631e-19	1.03223e-18	33.0929
ENSG00000196730|protein_coding|DAPK1	-1.12133	3.40039	-9.38238	1.73545e-19	1.0606e-18	33.0645
ENSG00000148848|protein_coding|ADAM12	1.23898	1.5078	9.36872	1.94001e-19	1.18085e-18	32.9543
ENSG00000203747|protein_coding|FCGR3A	-1.46433	5.00588	-9.34031	2.44539e-19	1.48013e-18	32.7254
ENSG00000039537|protein_coding|C6	-1.04831	0.683082	-9.33325	2.59005e-19	1.56394e-18	32.6686
ENSG00000162433|protein_coding|AK4	1.26669	1.76507	9.32184	2.84172e-19	1.71045e-18	32.577
ENSG00000110079|protein_coding|MS4A4A	-1.22061	3.19473	-9.32127	2.85513e-19	1.71784e-18	32.5723
ENSG00000026508|protein_coding|CD44	-1.14614	5.0137	-9.3148	3.00903e-19	1.80685e-18	32.5204
ENSG00000188817|protein_coding|SNTN	-1.17563	0.82941	-9.30907	3.15248e-19	1.88775e-18	32.4744
ENSG00000120738|protein_coding|EGR1	-1.71045	5.86516	-9.3032	3.30638e-19	1.97522e-18	32.4273
ENSG00000172005|protein_coding|MAL	-1.30692	2.07284	-9.29207	3.61876e-19	2.15695e-18	32.338
ENSG00000096696|protein_coding|DSP	1.81423	4.57805	9.28203	3.9258e-19	2.33421e-18	32.2575
ENSG00000005844|protein_coding|ITGAL	-1.15167	2.75709	-9.27983	3.99646e-19	2.37432e-18	32.2399
ENSG00000189143|protein_coding|CLDN4	1.14391	6.3301	9.27875	4.03147e-19	2.39328e-18	32.2313
ENSG00000162511|protein_coding|LAPTM5	-1.22258	6.45645	-9.27657	4.10321e-19	2.43491e-18	32.2138
ENSG00000077942|protein_coding|FBLN1	-1.38677	4.39654	-9.27292	4.22652e-19	2.50416e-18	32.1846
ENSG00000127249|protein_coding|ATP13A4	-1.73861	2.41239	-9.26423	4.53427e-19	2.68126e-18	32.1151
ENSG00000138356|protein_coding|AOX1	-1.08507	1.28675	-9.26301	4.57926e-19	2.70575e-18	32.1053
ENSG00000154146|protein_coding|NRGN	-1.88109	3.932	-9.2625	4.59842e-19	2.71495e-18	32.1012
ENSG00000124237|protein_coding|C20orf85	-2.48067	2.09707	-9.25296	4.96742e-19	2.92711e-18	32.0249
ENSG00000073605|protein_coding|GSDMB	1.129	2.21327	9.25233	4.99255e-19	2.94077e-18	32.0199
ENSG00000188523|protein_coding|CFAP77	-1.022	0.61601	-9.25055	5.0651e-19	2.98119e-18	32.0057
ENSG00000124212|protein_coding|PTGIS	-1.27181	2.36106	-9.24721	5.20355e-19	3.06148e-18	31.979
ENSG00000164023|protein_coding|SGMS2	-1.05182	3.30103	-9.23574	5.70877e-19	3.34573e-18	31.8875
ENSG00000271447|protein_coding|MMP28	-1.95878	2.69285	-9.23496	5.7448e-19	3.36554e-18	31.8812
ENSG00000117318|protein_coding|ID3	-1.10485	4.57347	-9.23293	5.83983e-19	3.41989e-18	31.865
ENSG00000158164|protein_coding|TMSB15A	-1.03607	0.839866	-9.21153	6.93998e-19	4.04227e-18	31.6944
ENSG00000165168|protein_coding|CYBB	-1.50083	4.48036	-9.19986	7.62434e-19	4.43406e-18	31.6015
ENSG00000172264|protein_coding|MACROD2	-1.18655	1.22002	-9.19767	7.76011e-19	4.50956e-18	31.5841
ENSG00000178773|protein_coding|CPNE7	1.21667	1.43016	9.18516	8.58228e-19	4.97779e-18	31.4845
ENSG00000088827|protein_coding|SIGLEC1	-1.15371	2.23323	-9.1782	9.07599e-19	5.25609e-18	31.4293
ENSG00000185681|protein_coding|MORN5	-1.38862	0.958815	-9.17208	9.53394e-19	5.50866e-18	31.3806
ENSG00000133216|protein_coding|EPHB2	1.12195	1.7041	9.16918	9.75844e-19	5.6255e-18	31.3576
ENSG00000243910|protein_coding|TUBA4B	-1.19608	0.800339	-9.16661	9.96231e-19	5.74084e-18	31.3372
ENSG00000155792|protein_coding|DEPTOR	1.20161	3.21377	9.15859	1.06247e-18	6.1063e-18	31.2736
ENSG00000152661|protein_coding|GJA1	-1.50391	4.92343	-9.15199	1.12024e-18	6.43097e-18	31.2213
ENSG00000007933|protein_coding|FMO3	-1.0508	1.9455	-9.13795	1.2538e-18	7.17325e-18	31.11
ENSG00000102359|protein_coding|SRPX2	1.53155	3.08775	9.13608	1.27265e-18	7.27556e-18	31.0952
ENSG00000132329|protein_coding|RAMP1	1.67707	4.15138	9.131	1.32557e-18	7.56952e-18	31.055
ENSG00000060718|protein_coding|COL11A1	2.03302	1.94445	9.1284	1.35349e-18	7.72315e-18	31.0344
ENSG00000127990|protein_coding|SGCE	-1.17699	3.37198	-9.12662	1.37292e-18	7.8281e-18	31.0203
ENSG00000050165|protein_coding|DKK3	-1.17452	3.8981	-9.10623	1.61616e-18	9.13933e-18	30.8591
ENSG00000143416|protein_coding|SELENBP1	-1.68231	5.48431	-9.10569	1.62317e-18	9.17554e-18	30.8548
ENSG00000196407|protein_coding|THEM5	1.23547	2.53909	9.10312	1.65689e-18	9.35491e-18	30.8345
ENSG00000198535|protein_coding|C2CD4A	1.57397	1.71316	9.10253	1.66465e-18	9.38901e-18	30.8299
ENSG00000133115|protein_coding|STOML3	-1.06104	0.649373	-9.10211	1.67028e-18	9.41726e-18	30.8266
ENSG00000166596|protein_coding|CFAP52	-1.049	0.727613	-9.09867	1.71683e-18	9.65452e-18	30.7994
ENSG00000122861|protein_coding|PLAU	1.85235	5.02108	9.0981	1.72464e-18	9.69483e-18	30.7949
ENSG00000164638|protein_coding|SLC29A4	1.44731	1.91101	9.07074	2.14559e-18	1.20111e-17	30.5792
ENSG00000125266|protein_coding|EFNB2	-1.16299	3.52176	-9.06042	2.32953e-18	1.30227e-17	30.4979
ENSG00000132744|protein_coding|ACY3	1.21175	1.53703	9.0543	2.44576e-18	1.36523e-17	30.4498
ENSG00000034239|protein_coding|EFCAB1	-1.02711	0.652998	-9.0538	2.45552e-18	1.36967e-17	30.4459
ENSG00000129521|protein_coding|EGLN3	1.65958	2.50218	9.02188	3.16505e-18	1.74933e-17	30.1951
ENSG00000109255|protein_coding|NMU	1.6773	1.76712	9.01556	3.3279e-18	1.83532e-17	30.1456
ENSG00000121552|protein_coding|CSTA	-1.27424	2.57119	-9.01262	3.40661e-18	1.87736e-17	30.1225
ENSG00000152669|protein_coding|CCNO	1.37106	2.17043	9.01176	3.4299e-18	1.8895e-17	30.1157
ENSG00000137825|protein_coding|ITPKA	1.8411	1.87708	9.00615	3.58589e-18	1.97113e-17	30.0718
ENSG00000196154|protein_coding|S100A4	-1.51296	7.0723	-8.98303	4.30691e-18	2.3538e-17	29.8908
ENSG00000167601|protein_coding|AXL	-1.05257	3.52189	-8.96669	4.9013e-18	2.67382e-17	29.7632
ENSG00000104951|protein_coding|IL4I1	1.32598	2.5423	8.95898	5.20957e-18	2.83586e-17	29.7029
ENSG00000103089|protein_coding|FA2H	1.44407	2.53873	8.95624	5.3233e-18	2.89569e-17	29.6816
ENSG00000148158|protein_coding|SNX30	-1.07599	2.75028	-8.95448	5.39795e-18	2.93524e-17	29.6678
ENSG00000179902|protein_coding|C1orf194	-1.46294	1.2091	-8.9464	5.75337e-18	3.12515e-17	29.6049
ENSG00000186907|protein_coding|RTN4RL2	1.51029	2.17488	8.93962	6.06968e-18	3.2887e-17	29.552
ENSG00000132698|protein_coding|RAB25	1.01395	6.08028	8.93832	6.1324e-18	3.3215e-17	29.5418
ENSG00000168589|protein_coding|DYNLRB2	-1.01478	0.788568	-8.93799	6.14846e-18	3.32782e-17	29.5393
ENSG00000109674|protein_coding|NEIL3	1.01732	1.0224	8.93298	6.39602e-18	3.45687e-17	29.5003
ENSG00000178401|protein_coding|DNAJC22	1.102	1.2164	8.92617	6.74882e-18	3.6423e-17	29.4473
ENSG00000136048|protein_coding|DRAM1	-1.29837	4.92774	-8.91627	7.29608e-18	3.9293e-17	29.3703
ENSG00000197769|protein_coding|MAP1LC3C	-1.14115	1.36093	-8.91161	7.56881e-18	4.07328e-17	29.334
ENSG00000165092|protein_coding|ALDH1A1	-1.86296	4.68762	-8.91035	7.6447e-18	4.1112e-17	29.3242
ENSG00000066248|protein_coding|NGEF	1.12486	1.33109	8.90923	7.71185e-18	4.14584e-17	29.3155
ENSG00000142227|protein_coding|EMP3	-1.02819	4.53358	-8.90257	8.12691e-18	4.35814e-17	29.2638
ENSG00000159388|protein_coding|BTG2	-1.34813	5.63277	-8.88415	9.39292e-18	5.01523e-17	29.1208
ENSG00000147804|protein_coding|SLC39A4	1.09454	3.21155	8.88214	9.54233e-18	5.09193e-17	29.1052
ENSG00000124116|protein_coding|WFDC3	1.52621	1.72068	8.87757	9.8913e-18	5.26701e-17	29.0697
ENSG00000165507|protein_coding|DEPP1	-1.27729	5.14922	-8.87738	9.90602e-18	5.273e-17	29.0683
ENSG00000167702|protein_coding|KIFC2	1.12417	2.15053	8.86937	1.05487e-17	5.60722e-17	29.0062
ENSG00000163263|protein_coding|C1orf189	-1.22535	0.956049	-8.86369	1.10295e-17	5.85458e-17	28.9622
ENSG00000043039|protein_coding|BARX2	1.32751	1.44427	8.8589	1.14509e-17	6.06761e-17	28.9252
ENSG00000103460|protein_coding|TOX3	1.48363	2.1248	8.84553	1.27156e-17	6.72836e-17	28.8217
ENSG00000081052|protein_coding|COL4A4	-1.08409	1.93997	-8.84162	1.31106e-17	6.92527e-17	28.7915
ENSG00000073150|protein_coding|PANX2	1.34876	2.14528	8.8413	1.31436e-17	6.94026e-17	28.789
ENSG00000136167|protein_coding|LCP1	-1.22345	5.2662	-8.83998	1.328e-17	7.00498e-17	28.7788
ENSG00000171617|protein_coding|ENC1	1.04213	3.86567	8.81824	1.57416e-17	8.27744e-17	28.611
ENSG00000149435|protein_coding|GGTLC1	-2.16322	2.77836	-8.81637	1.5972e-17	8.3957e-17	28.5966
ENSG00000198286|protein_coding|CARD11	1.2709	2.59081	8.80451	1.75215e-17	9.17831e-17	28.5052
ENSG00000166347|protein_coding|CYB5A	-1.18917	4.05957	-8.76852	2.31933e-17	1.20246e-16	28.2283
ENSG00000180535|protein_coding|BHLHA15	1.28185	1.72629	8.75819	2.5134e-17	1.29819e-16	28.149
ENSG00000130208|protein_coding|APOC1	-1.53725	6.0468	-8.74904	2.69862e-17	1.39054e-16	28.0788
ENSG00000001626|protein_coding|CFTR	-1.23917	1.42112	-8.74821	2.71611e-17	1.39907e-16	28.0725
ENSG00000101412|protein_coding|E2F1	1.10511	3.00417	8.74334	2.8207e-17	1.4495e-16	28.0352
ENSG00000187840|protein_coding|EIF4EBP1	1.27061	4.86983	8.73162	3.08931e-17	1.58377e-16	27.9454
ENSG00000107798|protein_coding|LIPA	-1.04302	4.93982	-8.71953	3.39289e-17	1.73529e-16	27.8529
ENSG00000164266|protein_coding|SPINK1	3.39689	3.89045	8.71262	3.57946e-17	1.82824e-16	27.8
ENSG00000243449|protein_coding|C4orf48	1.15699	2.66982	8.70831	3.70093e-17	1.88774e-16	27.7671
ENSG00000105388|protein_coding|CEACAM5	3.36203	5.33972	8.70689	3.74167e-17	1.90788e-16	27.7563
ENSG00000146166|protein_coding|LGSN	1.50128	1.53304	8.70345	3.84257e-17	1.958e-16	27.73
ENSG00000109814|protein_coding|UGDH	1.35203	4.74122	8.70059	3.92858e-17	1.99914e-16	27.7082
ENSG00000142552|protein_coding|RCN3	1.3609	3.92283	8.6968	4.04554e-17	2.05658e-16	27.6792
ENSG00000187678|protein_coding|SPRY4	-1.0269	3.40629	-8.69272	4.17518e-17	2.12035e-16	27.6481
ENSG00000152611|protein_coding|CAPSL	-1.44635	1.08895	-8.68976	4.27187e-17	2.16655e-16	27.6255
ENSG00000046604|protein_coding|DSG2	1.17154	4.70237	8.6853	4.42146e-17	2.24017e-16	27.5915
ENSG00000143196|protein_coding|DPT	-1.53354	3.51893	-8.67881	4.64898e-17	2.35308e-16	27.542
ENSG00000276180|protein_coding|H4C9	1.0231	3.15823	8.64264	6.14407e-17	3.08507e-16	27.2668
ENSG00000180644|protein_coding|PRF1	-1.21478	2.71298	-8.6411	6.21756e-17	3.12094e-16	27.2551
ENSG00000101417|protein_coding|PXMP4	-1.05772	2.90546	-8.63898	6.3197e-17	3.16906e-16	27.239
ENSG00000150551|protein_coding|LYPD1	1.13967	1.20068	8.63654	6.4393e-17	3.22583e-16	27.2205
ENSG00000144485|protein_coding|HES6	1.53458	2.71055	8.63074	6.73346e-17	3.36873e-16	27.1764
ENSG00000004838|protein_coding|ZMYND10	-1.32209	1.36417	-8.61846	7.39975e-17	3.69475e-16	27.0833
ENSG00000092607|protein_coding|TBX15	1.25741	1.37981	8.6171	7.47758e-17	3.73238e-16	27.073
ENSG00000136918|protein_coding|WDR38	-1.45066	1.13462	-8.61363	7.67971e-17	3.83201e-16	27.0467
ENSG00000141526|protein_coding|SLC16A3	1.14868	4.12706	8.61031	7.8776e-17	3.92946e-16	27.0216
ENSG00000145287|protein_coding|PLAC8	-1.38208	2.15762	-8.60903	7.95544e-17	3.96698e-16	27.0119
ENSG00000179094|protein_coding|PER1	-1.20714	3.83841	-8.60651	8.11107e-17	4.04059e-16	26.9927
ENSG00000143248|protein_coding|RGS5	-1.08238	3.7333	-8.60405	8.26549e-17	4.11211e-16	26.9741
ENSG00000173894|protein_coding|CBX2	1.14477	1.64683	8.60127	8.44387e-17	4.19672e-16	26.9531
ENSG00000162545|protein_coding|CAMK2N1	-1.4306	3.57842	-8.59586	8.80128e-17	4.36433e-16	26.9122
ENSG00000090776|protein_coding|EFNB1	-1.03965	3.26609	-8.59115	9.12478e-17	4.51883e-16	26.8766
ENSG00000133110|protein_coding|POSTN	1.55209	4.99505	8.58584	9.50374e-17	4.70035e-16	26.8364
ENSG00000185101|protein_coding|ANO9	1.12717	2.50531	8.56687	1.09893e-16	5.40683e-16	26.6931
ENSG00000072274|protein_coding|TFRC	-1.13983	4.20989	-8.56666	1.1007e-16	5.41379e-16	26.6915
ENSG00000111834|protein_coding|RSPH4A	-1.18954	1.06088	-8.56361	1.12666e-16	5.53785e-16	26.6685
ENSG00000243649|protein_coding|CFB	1.27619	2.50101	8.55988	1.15929e-16	5.68902e-16	26.6404
ENSG00000105664|protein_coding|COMP	1.96738	2.8791	8.5545	1.20789e-16	5.9256e-16	26.5998
ENSG00000140379|protein_coding|BCL2A1	-1.16699	3.21206	-8.54901	1.25961e-16	6.16332e-16	26.5585
ENSG00000101210|protein_coding|EEF1A2	2.77386	2.91368	8.54586	1.29033e-16	6.30755e-16	26.5347
ENSG00000169302|protein_coding|STK32A	1.03287	1.66282	8.53953	1.3542e-16	6.60907e-16	26.487
ENSG00000198598|protein_coding|MMP17	1.01114	1.28871	8.53913	1.35836e-16	6.62512e-16	26.484
ENSG00000204334|protein_coding|ERICH2	-1.10529	2.25805	-8.53121	1.44292e-16	7.02849e-16	26.4244
ENSG00000132000|protein_coding|PODNL1	1.26061	1.71369	8.52699	1.49012e-16	7.24908e-16	26.3927
ENSG00000161905|protein_coding|ALOX15	-1.45125	1.1081	-8.52322	1.53354e-16	7.45071e-16	26.3644
ENSG00000143850|protein_coding|PLEKHA6	1.1469	2.72373	8.51877	1.58638e-16	7.6976e-16	26.3309
ENSG00000176945|protein_coding|MUC20	1.51884	3.06515	8.51514	1.63087e-16	7.90332e-16	26.3037
ENSG00000122862|protein_coding|SRGN	-1.24912	6.74525	-8.50639	1.74319e-16	8.43143e-16	26.238
ENSG00000182667|protein_coding|NTM	-1.10724	1.60867	-8.49625	1.88294e-16	9.08129e-16	26.1619
ENSG00000104894|protein_coding|CD37	-1.07197	3.15876	-8.48254	2.08967e-16	1.00399e-15	26.0591
ENSG00000059804|protein_coding|SLC2A3	-1.21175	3.28547	-8.4806	2.12059e-16	1.01821e-15	26.0446
ENSG00000162551|protein_coding|ALPL	-2.07619	4.48891	-8.47519	2.2095e-16	1.05888e-15	26.0041
ENSG00000164442|protein_coding|CITED2	-1.12774	5.45897	-8.47002	2.2979e-16	1.1002e-15	25.9654
ENSG00000117122|protein_coding|MFAP2	1.1922	3.05086	8.46301	2.42337e-16	1.15844e-15	25.913
ENSG00000145491|protein_coding|ROPN1L	-1.14697	0.993715	-8.45823	2.51283e-16	1.19969e-15	25.8772
ENSG00000141756|protein_coding|FKBP10	1.4219	4.49657	8.45602	2.55512e-16	1.2195e-15	25.8608
ENSG00000145506|protein_coding|NKD2	-1.02256	2.15729	-8.45001	2.6742e-16	1.27313e-15	25.8159
ENSG00000104213|protein_coding|PDGFRL	1.07953	2.63042	8.43667	2.95825e-16	1.4035e-15	25.7163
ENSG00000153789|protein_coding|CIBAR2	-1.2871	1.12933	-8.42142	3.31952e-16	1.56998e-15	25.6027
ENSG00000160472|protein_coding|TMEM190	-1.61094	1.29994	-8.41689	3.4351e-16	1.62363e-15	25.5689
ENSG00000182272|protein_coding|B4GALNT4	1.41337	1.41394	8.39974	3.90938e-16	1.83805e-15	25.4414
ENSG00000187017|protein_coding|ESPN	1.25141	1.80447	8.39662	4.0025e-16	1.88008e-15	25.4182
ENSG00000188833|protein_coding|ENTPD8	1.05546	1.03786	8.39327	4.10484e-16	1.92636e-15	25.3933
ENSG00000124107|protein_coding|SLPI	-2.22689	8.29975	-8.38471	4.37799e-16	2.04947e-15	25.3297
ENSG00000166828|protein_coding|SCNN1G	-1.31588	2.08703	-8.38069	4.51253e-16	2.11049e-15	25.2999
ENSG00000163071|protein_coding|SPATA18	-1.16153	1.52801	-8.37324	4.77262e-16	2.22253e-15	25.2446
ENSG00000184515|protein_coding|BEX5	-1.10003	1.84803	-8.36606	5.03739e-16	2.3415e-15	25.1914
ENSG00000203760|protein_coding|CENPW	1.08826	2.95145	8.34897	5.72746e-16	2.64521e-15	25.0648
ENSG00000109610|protein_coding|SOD3	-1.22777	4.09111	-8.34572	5.86859e-16	2.70627e-15	25.0408
ENSG00000102409|protein_coding|BEX4	-1.05284	4.31072	-8.34289	5.99447e-16	2.76096e-15	25.0199
ENSG00000130821|protein_coding|SLC6A8	1.22526	2.67155	8.33885	6.17885e-16	2.84329e-15	24.99
ENSG00000115255|protein_coding|REEP6	1.39787	2.68755	8.33766	6.23404e-16	2.86694e-15	24.9813
ENSG00000182636|protein_coding|NDN	-1.01053	3.17581	-8.3324	6.48506e-16	2.97605e-15	24.9423
ENSG00000126264|protein_coding|HCST	-1.01259	3.29061	-8.32191	7.01474e-16	3.21232e-15	24.8649
ENSG00000166922|protein_coding|SCG5	1.42362	1.94731	8.31764	7.24285e-16	3.31377e-15	24.8334
ENSG00000170345|protein_coding|FOS	-1.56609	6.28225	-8.31157	7.57905e-16	3.46131e-15	24.7887
ENSG00000177575|protein_coding|CD163	-1.34495	3.85962	-8.31046	7.64228e-16	3.48741e-15	24.7805
ENSG00000029153|protein_coding|ARNTL2	1.23858	2.01925	8.30533	7.94129e-16	3.61584e-15	24.7426
ENSG00000005001|protein_coding|PRSS22	1.25065	3.32187	8.29799	8.38901e-16	3.81168e-15	24.6886
ENSG00000069122|protein_coding|ADGRF5	-1.61665	4.77223	-8.29106	8.83438e-16	4.01043e-15	24.6376
ENSG00000174939|protein_coding|ASPHD1	1.34344	1.93102	8.28696	9.10899e-16	4.1289e-15	24.6074
ENSG00000121316|protein_coding|PLBD1	-1.23211	3.87761	-8.27955	9.62633e-16	4.35038e-15	24.5529
ENSG00000154040|protein_coding|CABYR	1.38118	1.42764	8.20695	1.65131e-15	7.34e-15	24.0211
ENSG00000173156|protein_coding|RHOD	1.00292	4.09452	8.19288	1.83252e-15	8.1169e-15	23.9184
ENSG00000163017|protein_coding|ACTG2	-1.17234	2.2335	-8.19089	1.85976e-15	8.22554e-15	23.9039
ENSG00000137868|protein_coding|STRA6	1.13473	1.13365	8.18734	1.9092e-15	8.44173e-15	23.8781
ENSG00000128594|protein_coding|LRRC4	-1.03895	1.53664	-8.17869	2.0353e-15	8.98095e-15	23.815
ENSG00000119535|protein_coding|CSF3R	-1.34526	2.68085	-8.16097	2.31972e-15	1.02033e-14	23.6861
ENSG00000105219|protein_coding|CCNP	1.1042	1.12355	8.13709	2.76603e-15	1.21066e-14	23.5128
ENSG00000143119|protein_coding|CD53	-1.08676	4.97328	-8.10621	3.4707e-15	1.51209e-14	23.2892
ENSG00000165215|protein_coding|CLDN3	1.63716	5.55214	8.09677	3.71956e-15	1.61679e-14	23.2209
ENSG00000163993|protein_coding|S100P	3.04016	5.06649	8.08433	4.07467e-15	1.76457e-14	23.1311
ENSG00000107159|protein_coding|CA9	2.06889	2.09094	8.05926	4.89487e-15	2.1071e-14	22.9505
ENSG00000170271|protein_coding|FAXDC2	-1.27573	2.55547	-8.05261	5.13861e-15	2.21014e-14	22.9026
ENSG00000149328|protein_coding|GLB1L2	1.03486	2.39328	8.05151	5.18003e-15	2.22732e-14	22.8947
ENSG00000278828|protein_coding|H3C10	1.18621	1.7012	8.04814	5.3089e-15	2.2795e-14	22.8705
ENSG00000165548|protein_coding|TMEM63C	1.08512	1.1219	8.04787	5.31963e-15	2.28346e-14	22.8685
ENSG00000149260|protein_coding|CAPN5	1.21146	2.77599	8.04705	5.35129e-15	2.2964e-14	22.8627
ENSG00000163082|protein_coding|SGPP2	1.27853	4.22336	8.03585	5.80725e-15	2.48362e-14	22.7821
ENSG00000131016|protein_coding|AKAP12	-1.36006	2.34774	-8.02396	6.33246e-15	2.69833e-14	22.6968
ENSG00000093072|protein_coding|ADA2	-1.03865	3.98325	-8.00325	7.36262e-15	3.12149e-14	22.5484
ENSG00000050344|protein_coding|NFE2L3	1.00383	3.22115	7.99229	7.97283e-15	3.37264e-14	22.47
ENSG00000175793|protein_coding|SFN	1.27649	6.64804	7.98935	8.14446e-15	3.43948e-14	22.449
ENSG00000254709|protein_coding|IGLL5	1.90403	4.73611	7.96492	9.72304e-15	4.09357e-14	22.2746
ENSG00000215187|protein_coding|FAM166B	-1.11919	1.14457	-7.95732	1.02727e-14	4.31899e-14	22.2204
ENSG00000204252|protein_coding|HLA-DOA	-1.28896	3.92315	-7.95725	1.02779e-14	4.31995e-14	22.2199
ENSG00000123095|protein_coding|BHLHE41	-1.00558	2.57169	-7.94841	1.09568e-14	4.59895e-14	22.1569
ENSG00000090382|protein_coding|LYZ	-1.76179	7.55847	-7.94067	1.1587e-14	4.85269e-14	22.1019
ENSG00000159189|protein_coding|C1QC	-1.29574	6.99334	-7.9397	1.16686e-14	4.88277e-14	22.095
ENSG00000108582|protein_coding|CPD	1.06597	4.4092	7.9278	1.27157e-14	5.30341e-14	22.0103
ENSG00000121895|protein_coding|TMEM156	1.02996	1.44185	7.9214	1.33163e-14	5.54475e-14	21.9649
ENSG00000110848|protein_coding|CD69	-1.03358	2.16189	-7.91947	1.35036e-14	5.62117e-14	21.9512
ENSG00000167476|protein_coding|JSRP1	1.12826	1.41471	7.91662	1.37832e-14	5.73127e-14	21.931
ENSG00000152952|protein_coding|PLOD2	1.32272	3.44243	7.91541	1.39041e-14	5.77993e-14	21.9224
ENSG00000158966|protein_coding|CACHD1	-1.0863	1.98062	-7.90762	1.47068e-14	6.10192e-14	21.8671
ENSG00000156127|protein_coding|BATF	1.01793	3.56498	7.90244	1.52654e-14	6.32502e-14	21.8304
ENSG00000163975|protein_coding|MELTF	1.11206	1.50191	7.88154	1.7742e-14	7.31314e-14	21.6824
ENSG00000182489|protein_coding|XKRX	1.28637	1.84381	7.87602	1.84586e-14	7.59611e-14	21.6435
ENSG00000186710|protein_coding|CFAP73	-1.05586	0.959393	-7.85475	2.15014e-14	8.79096e-14	21.4933
ENSG00000145358|protein_coding|DDIT4L	1.27126	1.60357	7.85418	2.15893e-14	8.82452e-14	21.4892
ENSG00000170476|protein_coding|MZB1	1.64649	3.53012	7.8527	2.182e-14	8.91402e-14	21.4788
ENSG00000128298|protein_coding|BAIAP2L2	1.17561	1.35772	7.84412	2.32017e-14	9.46823e-14	21.4183
ENSG00000132746|protein_coding|ALDH3B2	1.23728	1.69985	7.81464	2.86435e-14	1.16107e-13	21.211
ENSG00000092969|protein_coding|TGFB2	-1.03556	1.74597	-7.79962	3.18839e-14	1.28898e-13	21.1055
ENSG00000139998|protein_coding|RAB15	1.07353	3.47822	7.77808	3.71681e-14	1.49621e-13	20.9546
ENSG00000163734|protein_coding|CXCL3	-1.10573	1.75379	-7.77516	3.79464e-14	1.52592e-13	20.9342
ENSG00000109654|protein_coding|TRIM2	1.0448	3.4003	7.76708	4.01903e-14	1.61187e-13	20.8777
ENSG00000135114|protein_coding|OASL	-1.00966	2.15838	-7.76369	4.11689e-14	1.64937e-13	20.854
ENSG00000170509|protein_coding|HSD17B13	-1.01021	0.75273	-7.75925	4.24886e-14	1.69909e-13	20.823
ENSG00000124466|protein_coding|LYPD3	1.50063	2.06496	7.75728	4.30857e-14	1.72252e-13	20.8092
ENSG00000138028|protein_coding|CGREF1	1.01556	1.04449	7.74655	4.64938e-14	1.85485e-13	20.7343
ENSG00000102878|protein_coding|HSF4	1.08578	1.97062	7.74458	4.71452e-14	1.87936e-13	20.7207
ENSG00000173227|protein_coding|SYT12	1.28673	1.22113	7.74354	4.74947e-14	1.89279e-13	20.7134
ENSG00000134013|protein_coding|LOXL2	1.19038	2.92424	7.72082	5.57849e-14	2.2098e-13	20.5551
ENSG00000141294|protein_coding|LRRC46	-1.10952	1.388	-7.70509	6.23413e-14	2.46243e-13	20.4458
ENSG00000137745|protein_coding|MMP13	1.88853	1.86793	7.70193	6.37478e-14	2.51602e-13	20.4238
ENSG00000143882|protein_coding|ATP6V1C2	1.11569	1.48419	7.6954	6.67521e-14	2.6298e-13	20.3785
ENSG00000114446|protein_coding|IFT57	-1.06367	4.43378	-7.69213	6.83092e-14	2.68346e-13	20.3559
ENSG00000002726|protein_coding|AOC1	1.91773	2.10991	7.6912	6.87615e-14	2.69843e-13	20.3494
ENSG00000153294|protein_coding|ADGRF4	1.03202	1.03008	7.67755	7.57006e-14	2.95924e-13	20.2548
ENSG00000197903|protein_coding|H2BC12	1.09983	5.89878	7.66393	8.3316e-14	3.24772e-13	20.1605
ENSG00000187908|protein_coding|DMBT1	-2.16214	3.20558	-7.63413	1.02704e-13	3.98398e-13	19.9548
ENSG00000115226|protein_coding|FNDC4	1.1528	2.38906	7.61997	1.1341e-13	4.38243e-13	19.8573
ENSG00000231389|protein_coding|HLA-DPA1	-1.27719	6.30574	-7.60979	1.21781e-13	4.69754e-13	19.7872
ENSG00000174938|protein_coding|SEZ6L2	1.31433	4.13678	7.59845	1.3182e-13	5.06929e-13	19.7093
ENSG00000179750|protein_coding|APOBEC3B	1.14924	1.91742	7.59344	1.36518e-13	5.24597e-13	19.6749
ENSG00000166278|protein_coding|C2	-1.14401	3.73879	-7.57033	1.60391e-13	6.12754e-13	19.5165
ENSG00000053747|protein_coding|LAMA3	-1.36559	2.50344	-7.56943	1.61399e-13	6.16364e-13	19.5103
ENSG00000172927|protein_coding|MYEOV	1.55752	1.48478	7.56469	1.66809e-13	6.3567e-13	19.4779
ENSG00000106541|protein_coding|AGR2	1.8011	6.72808	7.56327	1.68468e-13	6.41668e-13	19.4682
ENSG00000198488|protein_coding|B3GNT6	1.68615	1.64228	7.55479	1.787e-13	6.78764e-13	19.4102
ENSG00000188747|protein_coding|NOXA1	1.03364	2.95926	7.55064	1.83933e-13	6.98116e-13	19.3818
ENSG00000205362|protein_coding|MT1A	-1.39554	1.6046	-7.5504	1.84238e-13	6.99099e-13	19.3802
ENSG00000135245|protein_coding|HILPDA	1.11941	3.28035	7.54318	1.93721e-13	7.33245e-13	19.3308
ENSG00000204287|protein_coding|HLA-DRA	-1.26726	9.96368	-7.53916	1.99205e-13	7.53436e-13	19.3034
ENSG00000103811|protein_coding|CTSH	-1.33573	6.11627	-7.53288	2.0807e-13	7.85395e-13	19.2606
ENSG00000101213|protein_coding|PTK6	1.15333	3.01877	7.5306	2.11387e-13	7.9732e-13	19.245
ENSG00000129514|protein_coding|FOXA1	1.1286	4.00186	7.52767	2.15727e-13	8.13285e-13	19.2251
ENSG00000158406|protein_coding|H4C8	1.27549	2.48764	7.525	2.19761e-13	8.27877e-13	19.2069
ENSG00000166959|protein_coding|MS4A8	-1.48414	1.35436	-7.48357	2.92688e-13	1.09336e-12	18.9252
ENSG00000151012|protein_coding|SLC7A11	1.29678	1.69317	7.47562	3.09193e-13	1.15245e-12	18.8713
ENSG00000169291|protein_coding|SHE	-1.08681	1.93967	-7.47359	3.13539e-13	1.16779e-12	18.8576
ENSG00000184368|protein_coding|MAP7D2	1.08983	1.25118	7.47217	3.16625e-13	1.17841e-12	18.8479
ENSG00000087128|protein_coding|TMPRSS11E	1.68213	1.58095	7.47153	3.18025e-13	1.18334e-12	18.8436
ENSG00000144837|protein_coding|PLA1A	-1.06512	2.02019	-7.47137	3.18375e-13	1.18435e-12	18.8425
ENSG00000196754|protein_coding|S100A2	1.73863	3.19977	7.46648	3.29295e-13	1.22467e-12	18.8094
ENSG00000265972|protein_coding|TXNIP	-1.01427	7.51319	-7.46584	3.30753e-13	1.22948e-12	18.805
ENSG00000099194|protein_coding|SCD	-1.04887	6.16351	-7.46552	3.31468e-13	1.23184e-12	18.8029
ENSG00000128536|protein_coding|CDHR3	-1.12328	1.11561	-7.45414	3.58494e-13	1.32739e-12	18.7259
ENSG00000105369|protein_coding|CD79A	1.58347	3.60925	7.43657	4.04524e-13	1.49272e-12	18.6072
ENSG00000106538|protein_coding|RARRES2	-1.10201	5.15249	-7.41621	4.65168e-13	1.71025e-12	18.4699
ENSG00000111341|protein_coding|MGP	-1.19042	6.06657	-7.4128	4.76172e-13	1.74858e-12	18.447
ENSG00000164099|protein_coding|PRSS12	-1.10637	1.52682	-7.36267	6.7066e-13	2.43619e-12	18.1105
ENSG00000184557|protein_coding|SOCS3	-1.0445	5.74478	-7.34681	7.47161e-13	2.70448e-12	18.0044
ENSG00000038427|protein_coding|VCAN	1.21802	3.58002	7.34297	7.66893e-13	2.76981e-12	17.9788
ENSG00000170608|protein_coding|FOXA3	1.23548	1.56885	7.34258	7.68961e-13	2.77596e-12	17.9762
ENSG00000182853|protein_coding|VMO1	-1.01071	2.58228	-7.33944	7.85521e-13	2.83371e-12	17.9552
ENSG00000139629|protein_coding|GALNT6	1.19487	2.9476	7.33793	7.93638e-13	2.86095e-12	17.9451
ENSG00000169894|protein_coding|MUC3A	1.49667	1.62566	7.33035	8.35607e-13	3.00438e-12	17.8945
ENSG00000170561|protein_coding|IRX2	-1.62744	2.74108	-7.31965	8.98534e-13	3.22527e-12	17.8232
ENSG00000065618|protein_coding|COL17A1	1.71616	2.01747	7.31283	9.41031e-13	3.36982e-12	17.7778
ENSG00000198502|protein_coding|HLA-DRB5	-1.5305	7.47835	-7.28612	1.12753e-12	4.01962e-12	17.6003
ENSG00000185567|protein_coding|AHNAK2	1.21851	2.18763	7.26156	1.33079e-12	4.70987e-12	17.4375
ENSG00000196126|protein_coding|HLA-DRB1	-1.25991	9.0897	-7.24545	1.48334e-12	5.22532e-12	17.331
ENSG00000180596|protein_coding|H2BC4	1.24062	2.62464	7.24132	1.52514e-12	5.35886e-12	17.3037
ENSG00000189221|protein_coding|MAOA	-1.23753	4.32527	-7.23494	1.59194e-12	5.58841e-12	17.2616
ENSG00000164694|protein_coding|FNDC1	1.2237	2.0682	7.23061	1.63895e-12	5.74545e-12	17.2331
ENSG00000223865|protein_coding|HLA-DPB1	-1.16003	7.04563	-7.22899	1.65691e-12	5.80167e-12	17.2224
ENSG00000112175|protein_coding|BMP5	-1.06341	1.99121	-7.21697	1.7962e-12	6.2691e-12	17.1431
ENSG00000186973|protein_coding|FAM183A	-1.29568	1.76282	-7.18476	2.22848e-12	7.71914e-12	16.9315
ENSG00000114270|protein_coding|COL7A1	1.02087	1.25529	7.18122	2.28186e-12	7.90044e-12	16.9082
ENSG00000163568|protein_coding|AIM2	1.26749	1.86409	7.17588	2.3648e-12	8.1801e-12	16.8732
ENSG00000164692|protein_coding|COL1A2	1.28535	6.80114	7.17146	2.43559e-12	8.4173e-12	16.8443
ENSG00000141682|protein_coding|PMAIP1	1.11673	2.86177	7.16725	2.50499e-12	8.64728e-12	16.8167
ENSG00000162482|protein_coding|AKR7A3	1.46912	1.55548	7.14973	2.8152e-12	9.68059e-12	16.7021
ENSG00000157514|protein_coding|TSC22D3	-1.01012	5.36955	-7.14898	2.82924e-12	9.72667e-12	16.6972
ENSG00000166736|protein_coding|HTR3A	1.22012	1.15489	7.14403	2.92403e-12	1.00343e-11	16.6649
ENSG00000101825|protein_coding|MXRA5	1.17993	3.31192	7.14381	2.92835e-12	1.00469e-11	16.6634
ENSG00000179639|protein_coding|FCER1A	-1.30917	2.02585	-7.13512	3.1025e-12	1.06251e-11	16.6068
ENSG00000147889|protein_coding|CDKN2A	1.41314	1.82397	7.12415	3.33713e-12	1.14003e-11	16.5352
ENSG00000163629|protein_coding|PTPN13	-1.20226	2.7646	-7.12327	3.35664e-12	1.14618e-11	16.5295
ENSG00000160188|protein_coding|RSPH1	-1.11679	1.57784	-7.11061	3.65076e-12	1.24213e-11	16.4471
ENSG00000128218|protein_coding|VPREB3	1.00352	1.53722	7.07254	4.69632e-12	1.5854e-11	16.2
ENSG00000215217|protein_coding|C5orf49	-1.06308	1.4054	-7.06741	4.85804e-12	1.63817e-11	16.1668
ENSG00000134028|protein_coding|ADAMDEC1	1.22847	1.90329	7.04856	5.50069e-12	1.84624e-11	16.045
ENSG00000148346|protein_coding|LCN2	1.93642	5.45365	7.04027	5.80924e-12	1.94506e-11	15.9914
ENSG00000125872|protein_coding|LRRN4	-1.4679	2.44944	-7.03352	6.07301e-12	2.02934e-11	15.9479
ENSG00000105374|protein_coding|NKG7	-1.1746	3.40848	-7.02988	6.21972e-12	2.07745e-11	15.9245
ENSG00000183018|protein_coding|SPNS2	-1.08783	2.86751	-6.99965	7.58367e-12	2.51416e-11	15.7301
ENSG00000006534|protein_coding|ALDH3B1	-1.06909	4.06344	-6.98288	8.46309e-12	2.79409e-11	15.6225
ENSG00000135750|protein_coding|KCNK1	1.02134	3.24961	6.98097	8.56932e-12	2.82855e-11	15.6103
ENSG00000138271|protein_coding|GPR87	1.55842	1.7416	6.96648	9.4193e-12	3.09898e-11	15.5175
ENSG00000105894|protein_coding|PTN	-1.19101	2.23891	-6.95739	9.99443e-12	3.2832e-11	15.4594
ENSG00000143153|protein_coding|ATP1B1	1.01176	7.31737	6.95479	1.01649e-11	3.33704e-11	15.4429
ENSG00000123838|protein_coding|C4BPA	-2.04348	5.39816	-6.93967	1.12166e-11	3.66957e-11	15.3463
ENSG00000125968|protein_coding|ID1	-1.25463	5.1768	-6.91428	1.32263e-11	4.2955e-11	15.1848
ENSG00000070526|protein_coding|ST6GALNAC1	1.43133	3.65532	6.90327	1.42047e-11	4.59847e-11	15.1149
ENSG00000171346|protein_coding|KRT15	1.3131	2.19956	6.89994	1.4514e-11	4.69358e-11	15.0937
ENSG00000164265|protein_coding|SCGB3A2	-2.743	5.97935	-6.87632	1.69078e-11	5.43635e-11	14.9441
ENSG00000096088|protein_coding|PGC	-3.19411	4.81682	-6.87296	1.72782e-11	5.54955e-11	14.9229
ENSG00000164626|protein_coding|KCNK5	1.11186	3.71175	6.85068	1.99455e-11	6.38324e-11	14.7823
ENSG00000145824|protein_coding|CXCL14	2.23559	3.96956	6.84614	2.05371e-11	6.56146e-11	14.7536
ENSG00000167157|protein_coding|PRRX2	1.07685	1.82582	6.81653	2.48382e-11	7.88741e-11	14.5673
ENSG00000204019|protein_coding|CT83	1.75663	1.65913	6.81548	2.50061e-11	7.93406e-11	14.5607
ENSG00000165449|protein_coding|SLC16A9	1.29306	1.83525	6.81186	2.55928e-11	8.11172e-11	14.538
ENSG00000077327|protein_coding|SPAG6	-1.04878	1.09535	-6.79074	2.92957e-11	9.24857e-11	14.4057
ENSG00000273802|protein_coding|H2BC8	1.19674	1.37931	6.76713	3.4059e-11	1.06877e-10	14.2581
ENSG00000008853|protein_coding|RHOBTB2	-1.02001	3.94636	-6.76038	3.55549e-11	1.11272e-10	14.216
ENSG00000240204|protein_coding|SMKR1	1.07798	1.55809	6.74965	3.80682e-11	1.18867e-10	14.1491
ENSG00000245848|protein_coding|CEBPA	-1.02353	3.07242	-6.73678	4.13107e-11	1.28383e-10	14.0691
ENSG00000155622|protein_coding|XAGE2	-1.35327	1.12287	-6.73362	4.21492e-11	1.30881e-10	14.0494
ENSG00000088992|protein_coding|TESC	1.91678	3.8117	6.72929	4.33216e-11	1.34412e-10	14.0226
ENSG00000176788|protein_coding|BASP1	1.21113	4.65991	6.71153	4.84822e-11	1.4984e-10	13.9124
ENSG00000166592|protein_coding|RRAD	-1.35692	3.52628	-6.66134	6.65493e-11	2.03395e-10	13.6024
ENSG00000172061|protein_coding|LRRC15	1.15797	1.84591	6.64984	7.15386e-11	2.18116e-10	13.5316
ENSG00000163359|protein_coding|COL6A3	1.03683	4.80433	6.64429	7.40794e-11	2.25545e-10	13.4975
ENSG00000156510|protein_coding|HKDC1	1.01321	2.23447	6.64213	7.50885e-11	2.28525e-10	13.4842
ENSG00000185686|protein_coding|PRAME	1.59104	1.46133	6.63832	7.69081e-11	2.33828e-10	13.4608
ENSG00000137331|protein_coding|IER3	1.03644	5.60755	6.61157	9.09342e-11	2.74543e-10	13.2969
ENSG00000113924|protein_coding|HGD	1.47116	1.94583	6.60425	9.51915e-11	2.86825e-10	13.2521
ENSG00000203985|protein_coding|LDLRAD1	-1.13028	1.47373	-6.59728	9.94265e-11	2.99168e-10	13.2095
ENSG00000115828|protein_coding|QPCT	1.45695	3.12264	6.59282	1.02237e-10	3.07442e-10	13.1823
ENSG00000132470|protein_coding|ITGB4	1.23377	4.54283	6.58054	1.10367e-10	3.311e-10	13.1074
ENSG00000277639|protein_coding|RP11-467J12.4	-1.40675	1.97944	-6.557	1.27775e-10	3.82037e-10	12.9642
ENSG00000260027|protein_coding|HOXB7	1.15428	2.41068	6.55032	1.33185e-10	3.97587e-10	12.9236
ENSG00000277075|protein_coding|H2AC8	1.22789	1.48739	6.53925	1.42654e-10	4.24346e-10	12.8564
ENSG00000170369|protein_coding|CST2	1.05425	1.47801	6.53032	1.50769e-10	4.47519e-10	12.8023
ENSG00000143546|protein_coding|S100A8	-1.49102	4.05362	-6.51673	1.63989e-10	4.84764e-10	12.7201
ENSG00000186832|protein_coding|KRT16	1.32023	1.37193	6.51003	1.70918e-10	5.04854e-10	12.6797
ENSG00000145113|protein_coding|MUC4	1.29034	2.14352	6.5085	1.72543e-10	5.09456e-10	12.6704
ENSG00000187837|protein_coding|H1-2	1.16241	5.81769	6.50792	1.73154e-10	5.11159e-10	12.667
ENSG00000116711|protein_coding|PLA2G4A	1.35981	3.41058	6.49324	1.89566e-10	5.5711e-10	12.5784
ENSG00000101443|protein_coding|WFDC2	1.39217	7.35636	6.48983	1.93594e-10	5.68287e-10	12.5579
ENSG00000183036|protein_coding|PCP4	1.71652	1.89802	6.48005	2.05604e-10	6.02491e-10	12.499
ENSG00000134873|protein_coding|CLDN10	1.43181	1.67569	6.47875	2.07266e-10	6.07124e-10	12.4912
ENSG00000131746|protein_coding|TNS4	1.43305	1.8184	6.46823	2.21114e-10	6.46063e-10	12.4279
ENSG00000049089|protein_coding|COL9A2	1.10698	2.43669	6.45614	2.38136e-10	6.93965e-10	12.3554
ENSG00000103888|protein_coding|CEMIP	1.15753	2.56908	6.4004	3.34821e-10	9.65079e-10	12.0225
ENSG00000161055|protein_coding|SCGB3A1	-2.58512	5.67164	-6.38809	3.6085e-10	1.03754e-09	11.9493
ENSG00000176153|protein_coding|GPX2	2.50241	3.19835	6.3809	3.76978e-10	1.08165e-09	11.9066
ENSG00000154277|protein_coding|UCHL1	1.78444	3.18621	6.37785	3.84026e-10	1.10062e-09	11.8885
ENSG00000204616|protein_coding|TRIM31	1.00806	1.13264	6.37735	3.85193e-10	1.10376e-09	11.8855
ENSG00000120875|protein_coding|DUSP4	1.29522	3.00693	6.37684	3.86393e-10	1.10699e-09	11.8825
ENSG00000006210|protein_coding|CX3CL1	-1.22883	3.69245	-6.36184	4.232e-10	1.20832e-09	11.7936
ENSG00000110195|protein_coding|FOLR1	-1.69929	5.72784	-6.36004	4.2783e-10	1.22108e-09	11.783
ENSG00000047936|protein_coding|ROS1	-1.23253	2.94639	-6.34077	4.80765e-10	1.36701e-09	11.6691
ENSG00000075461|protein_coding|CACNG4	-1.27988	1.98984	-6.33417	5.00318e-10	1.42048e-09	11.6301
ENSG00000196735|protein_coding|HLA-DQA1	-1.12537	5.01797	-6.31564	5.59505e-10	1.58229e-09	11.5209
ENSG00000163053|protein_coding|SLC16A14	1.25704	2.06408	6.31064	5.7661e-10	1.62823e-09	11.4915
ENSG00000204544|protein_coding|MUC21	1.81626	2.92955	6.29055	6.50636e-10	1.8318e-09	11.3736
ENSG00000172478|protein_coding|MAB21L4	-1.07907	2.53665	-6.28529	6.71494e-10	1.88771e-09	11.3428
ENSG00000168878|protein_coding|SFTPB	-2.28599	9.80375	-6.25651	7.97811e-10	2.23122e-09	11.1745
ENSG00000138615|protein_coding|CILP	1.05028	1.56047	6.23768	8.92752e-10	2.48435e-09	11.0648
ENSG00000122133|protein_coding|PAEP	2.27891	2.33414	6.22598	9.57227e-10	2.65596e-09	10.9968
ENSG00000129538|protein_coding|RNASE1	-1.21145	8.04461	-6.22516	9.61898e-10	2.66657e-09	10.992
ENSG00000168447|protein_coding|SCNN1B	-1.22094	3.63498	-6.2177	1.00561e-09	2.78205e-09	10.9486
ENSG00000133135|protein_coding|RNF128	-1.18722	2.61791	-6.21584	1.01679e-09	2.81092e-09	10.9378
ENSG00000181218|protein_coding|H2AW	1.26734	2.53174	6.20652	1.07465e-09	2.96494e-09	10.8838
ENSG00000124731|protein_coding|TREM1	-1.17851	3.43554	-6.20335	1.09508e-09	3.0191e-09	10.8655
ENSG00000142102|protein_coding|PGGHG	1.34632	3.98528	6.20131	1.10842e-09	3.05533e-09	10.8537
ENSG00000272398|protein_coding|CD24	1.16685	5.97233	6.19773	1.13225e-09	3.11815e-09	10.8329
ENSG00000143512|protein_coding|HHIPL2	1.10923	1.05027	6.15291	1.47591e-09	4.02651e-09	10.5743
ENSG00000122966|protein_coding|CIT	1.1386	2.72987	6.11516	1.84289e-09	4.96862e-09	10.3578
ENSG00000173702|protein_coding|MUC13	1.82546	1.93143	6.10148	1.99681e-09	5.37309e-09	10.2796
ENSG00000105048|protein_coding|TNNT1	1.4734	2.26846	6.07377	2.34794e-09	6.27553e-09	10.1217
ENSG00000170577|protein_coding|SIX2	1.01331	1.25012	6.03954	2.86549e-09	7.60649e-09	9.92754
ENSG00000001084|protein_coding|GCLC	1.15783	2.91643	6.03564	2.93122e-09	7.77687e-09	9.90544
ENSG00000188910|protein_coding|GJB3	1.19856	1.66488	6.02987	3.03087e-09	8.02439e-09	9.87286
ENSG00000187608|protein_coding|ISG15	1.11486	5.97554	6.01638	3.27741e-09	8.64689e-09	9.79667
ENSG00000146477|protein_coding|SLC22A3	-1.09595	2.97622	-5.99608	3.68538e-09	9.67941e-09	9.68237
ENSG00000198695|protein_coding|MT-ND6	-1.16977	10.3648	-5.98953	3.82729e-09	1.00312e-08	9.64557
ENSG00000160886|protein_coding|LY6K	1.03632	1.17927	5.98834	3.85385e-09	1.00956e-08	9.63883
ENSG00000087085|protein_coding|ACHE	1.05119	1.78192	5.98358	3.96098e-09	1.03709e-08	9.61213
ENSG00000143452|protein_coding|HORMAD1	1.01641	1.05885	5.9814	4.01106e-09	1.04965e-08	9.59989
ENSG00000070087|protein_coding|PFN2	1.05876	4.27423	5.93737	5.16522e-09	1.34011e-08	9.35362
ENSG00000104760|protein_coding|FGL1	1.71383	1.65021	5.93502	5.23508e-09	1.35754e-08	9.34054
ENSG00000129451|protein_coding|KLK10	-1.21842	1.75311	-5.93411	5.26234e-09	1.36414e-08	9.33548
ENSG00000105696|protein_coding|TMEM59L	1.42626	1.77309	5.89968	6.40562e-09	1.64809e-08	9.1441
ENSG00000131668|protein_coding|BARX1	1.53309	1.42785	5.85028	8.47887e-09	2.16241e-08	8.87123
ENSG00000198729|protein_coding|PPP1R14C	-1.05443	2.86301	-5.84795	8.59117e-09	2.18958e-08	8.85843
ENSG00000169550|protein_coding|MUC15	-1.11838	2.27379	-5.82261	9.91221e-09	2.51315e-08	8.71929
ENSG00000117983|protein_coding|MUC5B	1.94462	2.93126	5.80368	1.10258e-08	2.78524e-08	8.61574
ENSG00000125571|protein_coding|IL37	1.511	1.51976	5.77155	1.32024e-08	3.31077e-08	8.44056
ENSG00000135318|protein_coding|NT5E	1.12488	3.37777	5.75764	1.42691e-08	3.5647e-08	8.36502
ENSG00000153162|protein_coding|BMP6	-1.04792	1.83592	-5.75475	1.45009e-08	3.61604e-08	8.34935
ENSG00000125798|protein_coding|FOXA2	-1.16291	3.1119	-5.75226	1.4704e-08	3.66427e-08	8.33584
ENSG00000137285|protein_coding|TUBB2B	1.21106	1.54455	5.74864	1.50039e-08	3.7347e-08	8.31621
ENSG00000132821|protein_coding|VSTM2L	1.3861	4.27588	5.74164	1.56005e-08	3.87683e-08	8.27831
ENSG00000167656|protein_coding|LY6D	1.28042	1.27476	5.6918	2.05704e-08	5.05138e-08	8.00957
ENSG00000127831|protein_coding|VIL1	1.16258	1.07668	5.69006	2.07687e-08	5.09759e-08	8.00025
ENSG00000184012|protein_coding|TMPRSS2	-1.01822	3.94779	-5.68006	2.19485e-08	5.37583e-08	7.94658
ENSG00000179593|protein_coding|ALOX15B	-1.30588	3.69711	-5.65767	2.483e-08	6.0532e-08	7.82676
ENSG00000164171|protein_coding|ITGA2	1.00045	3.31372	5.65637	2.50083e-08	6.09571e-08	7.81981
ENSG00000134827|protein_coding|TCN1	1.62388	1.65213	5.60796	3.26059e-08	7.86656e-08	7.56223
ENSG00000174564|protein_coding|IL20RB	1.00215	1.23732	5.58577	3.67985e-08	8.84144e-08	7.44482
ENSG00000160182|protein_coding|TFF1	2.06928	2.03192	5.5532	4.39161e-08	1.04801e-07	7.27324
ENSG00000182795|protein_coding|C1orf116	-1.14334	4.95316	-5.45202	7.56423e-08	1.76724e-07	6.74597
ENSG00000180818|protein_coding|HOXC10	1.05051	0.992238	5.44429	7.88264e-08	1.8388e-07	6.70601
ENSG00000181617|protein_coding|FDCSP	1.23255	2.00695	5.44086	8.02788e-08	1.87095e-07	6.68832
ENSG00000198074|protein_coding|AKR1B10	1.90731	1.95576	5.40975	9.46979e-08	2.19484e-07	6.52827
ENSG00000157765|protein_coding|SLC34A2	-1.37977	8.04825	-5.40454	9.73509e-08	2.25529e-07	6.5015
ENSG00000213886|protein_coding|UBD	1.0941	2.87043	5.4037	9.77842e-08	2.26429e-07	6.4972
ENSG00000179344|protein_coding|HLA-DQB1	-1.00872	5.72148	-5.38786	1.06326e-07	2.45494e-07	6.41608
ENSG00000166825|protein_coding|ANPEP	-1.00183	2.91026	-5.36643	1.19042e-07	2.73604e-07	6.30668
ENSG00000164120|protein_coding|HPGD	-1.27382	3.55588	-5.36518	1.19825e-07	2.75335e-07	6.30034
ENSG00000167772|protein_coding|ANGPTL4	1.20769	3.51915	5.35676	1.25251e-07	2.87394e-07	6.25745
ENSG00000006016|protein_coding|CRLF1	1.72848	3.12085	5.35654	1.25395e-07	2.8768e-07	6.25634
ENSG00000135744|protein_coding|AGT	1.14218	2.30504	5.32309	1.49418e-07	3.40272e-07	6.08667
ENSG00000205420|protein_coding|KRT6A	1.57221	1.84264	5.1023	4.64326e-07	1.01162e-06	4.99072
ENSG00000137077|protein_coding|CCL21	-1.02568	5.13213	-5.07985	5.19884e-07	1.12666e-06	4.88164
ENSG00000171564|protein_coding|FGB	1.99506	1.9527	5.07977	5.20105e-07	1.12698e-06	4.88123
ENSG00000167757|protein_coding|KLK11	-1.32736	2.3006	-5.07827	5.24039e-07	1.13502e-06	4.87396
ENSG00000172724|protein_coding|CCL19	1.174	4.03237	5.02391	6.87751e-07	1.47655e-06	4.61172
ENSG00000153292|protein_coding|ADGRF1	1.06261	1.99568	5.02194	6.94504e-07	1.48953e-06	4.60229
ENSG00000169469|protein_coding|SPRR1B	1.3125	1.35701	4.99498	7.94001e-07	1.69095e-06	4.47322
ENSG00000157399|protein_coding|ARSL	1.03835	2.65332	4.94915	9.95473e-07	2.09643e-06	4.25531
ENSG00000158825|protein_coding|CDA	1.18757	2.95741	4.94457	1.01814e-06	2.14179e-06	4.23362
ENSG00000275385|protein_coding|CCL18	-1.1251	5.57559	-4.93994	1.04156e-06	2.18892e-06	4.21172
ENSG00000206075|protein_coding|SERPINB5	1.00385	1.12145	4.89223	1.31509e-06	2.74246e-06	3.98719
ENSG00000153446|protein_coding|C16orf89	-1.48612	5.5566	-4.84903	1.62161e-06	3.35671e-06	3.78558
ENSG00000163207|protein_coding|IVL	1.00529	1.14986	4.82424	1.82742e-06	3.76778e-06	3.67067
ENSG00000102109|protein_coding|PCSK1N	1.06581	2.21262	4.82184	1.84867e-06	3.81005e-06	3.65955
ENSG00000170689|protein_coding|HOXB9	1.01011	0.942133	4.80541	2.00034e-06	4.10923e-06	3.58374
ENSG00000148702|protein_coding|HABP2	1.03679	1.99599	4.75987	2.48626e-06	5.07029e-06	3.37476
ENSG00000123999|protein_coding|INHA	1.04795	1.05168	4.75623	2.52966e-06	5.15601e-06	3.35813
ENSG00000198732|protein_coding|SMOC1	1.021	1.36661	4.74364	2.68549e-06	5.45819e-06	3.30072
ENSG00000275896|protein_coding|PRSS2	1.28294	1.4678	4.73579	2.78725e-06	5.65213e-06	3.265
ENSG00000175315|protein_coding|CST6	-1.07178	3.3937	-4.71822	3.0287e-06	6.11887e-06	3.18523
ENSG00000105825|protein_coding|TFPI2	1.54829	3.51655	4.69708	3.34591e-06	6.7363e-06	3.08962
ENSG00000162896|protein_coding|PIGR	-1.6353	6.01961	-4.65504	4.07424e-06	8.13881e-06	2.90067
ENSG00000197249|protein_coding|SERPINA1	-1.08738	6.87863	-4.56325	6.23085e-06	1.22434e-05	2.49354
ENSG00000131400|protein_coding|NAPSA	-1.42673	7.83839	-4.55561	6.45297e-06	1.26553e-05	2.46
ENSG00000101842|protein_coding|VSIG1	1.20676	1.86199	4.5063	8.08064e-06	1.56768e-05	2.24472
ENSG00000205426|protein_coding|KRT81	1.0233	1.11452	4.44946	1.04452e-05	2.00333e-05	1.9993
ENSG00000184697|protein_coding|CLDN6	1.19971	1.29605	4.44892	1.04704e-05	2.0079e-05	1.997
ENSG00000146013|protein_coding|GFRA3	1.12387	2.05248	4.40866	1.25371e-05	2.38461e-05	1.82491
ENSG00000137673|protein_coding|MMP7	1.13381	4.15931	4.32602	1.8067e-05	3.38539e-05	1.47626
ENSG00000145423|protein_coding|SFRP2	1.0563	5.09185	4.26618	2.34521e-05	4.35137e-05	1.22768
ENSG00000198183|protein_coding|BPIFA1	2.00271	3.94143	4.23495	2.68411e-05	4.94864e-05	1.09919
ENSG00000173467|protein_coding|AGR3	-1.16758	4.87087	-4.21077	2.97798e-05	5.47379e-05	1.00034
ENSG00000221867|protein_coding|MAGEA3	1.00345	0.916573	4.13551	4.10165e-05	7.43719e-05	0.69608
ENSG00000128422|protein_coding|KRT17	1.17237	3.64905	4.09812	4.80014e-05	8.6447e-05	0.546811
ENSG00000115009|protein_coding|CCL20	1.06313	3.44046	4.0746	5.29593e-05	9.50706e-05	0.453573
ENSG00000021826|protein_coding|CPS1	1.27862	1.43209	3.94496	9.02605e-05	0.000158408	-0.0512607
ENSG00000173432|protein_coding|SAA1	1.02295	2.99186	3.85019	0.000132054	0.00022803	-0.410533
ENSG00000151632|protein_coding|AKR1C2	1.14915	2.50802	3.0721	0.00223189	0.00337525	-3.04456
ENSG00000263639|protein_coding|MSMB	1.03467	3.07623	2.59801	0.00963052	0.0135594	-4.36879
