# Supplementary material for: Identification of a methyltransferase-related long noncoding RNA signature as a novel prognosis biomarker for lung adenocarcinoma
Source: Aging (Albany NY). 2024 May 20;16(10):8747–71. doi: 10.18632/aging.205837 (PMC11164517; doi:10.18632/aging.205837)
Supplement: Supplementary Table 2 [file aging-16-205837-s002.xlsx]

## Sheet: Sheet1
Supplementary Table 2. The 156 methyltransferase-related genes from MsigDB.
Symbol
CMTR1
CMTR2
METTL14
METTL16
METTL3
METTL8
PCIF1
RAMAC
RNMT
TRMT10C
TRMT61A
TRMT61B
FTSJ1
FTSJ3
HENMT1
MRM1
MRM2
MRM3
TRMT13
ALKBH8
BCDIN3D
BMT2
BUD23
DIMT1
EMG1
FBL
FBLL1
FDXACB1
LCMT2
MEPCE
METTL1
METTL15
METTL15P1
METTL2A
METTL2B
METTL4
METTL5
METTL6
NOP2
NSUN2
NSUN3
NSUN4
NSUN5
NSUN6
RRNAD1
TARBP1
TFB1M
TFB2M
TGS1
THUMPD2
THUMPD3
TRDMT1
TRMO
TRMT1
TRMT10A
TRMT10B
TRMT11
TRMT112
TRMT12
TRMT1L
TRMT2A
TRMT2B
TRMT44
TRMT5
TRMT6
TRMT9B
TYW3
WDR4
ZCCHC4
CLNS1A
ERH
PRMT1
PRMT5
SNRPB
SNRPD1
SNRPD2
SNRPD3
SNRPE
SNRPF
SNRPG
WDR77
AEBP2
ASH2L
C17orf49
CBLL1
CBX5
CHD8
CXXC1
DNMT3L
DPY30
DYDC1
DYDC2
E2F6
EED
EPOP
EZH1
EZH2
HCFC1
HCFC2
HDAC2
HDAC9
INO80C
JARID2
KANSL1
KAT8
KDM6A
KDM6B
KMT2A
KMT2B
KMT2C
KMT2D
LAS1L
MAX
MCRS1
MEN1
MGA
MTF2
N6AMT1
NCOA6
PAGR1
PAXIP1
PELP1
PHF1
PHF19
PHF20
PRDM4
PRPF31
RBBP4
RBBP5
RBBP7
RBM15
RBM15B
RIOK1
RNF2
RUVBL1
RUVBL2
SENP3
SETD1A
SETD1B
SIRT1
SUZ12
TAF1
TAF4
TAF6
TAF7
TAF9
TEX10
TRIM37
UTY
VIRMA
WDR5
WDR5B
WDR82
WTAP
ZC3H13
ZNF335
