# Supplementary material for: Identification of a methyltransferase-related long noncoding RNA signature as a novel prognosis biomarker for lung adenocarcinoma
Source: Aging (Albany NY). 2024 May 20;16(10):8747–71. doi: 10.18632/aging.205837 (PMC11164517; doi:10.18632/aging.205837)
Supplement: Supplementary Table 3 [file aging-16-205837-s003.xlsx]

## Sheet: TCGA-LUAD_FPKM_lncRNA_diff
Supplementary Table 3. The 87 DElncRNAs between normal and LUAD samples in TCGA-LUAD cohort.
	logFC	AveExpr	t	P.Value	adj.P.Val	B
ENSG00000268388|lncRNA|FENDRR	-2.49652	0.850262	-29.6707	8.50015e-116	1.83895e-112	253.736
ENSG00000238018|lncRNA|AC093110.3	-2.38304	1.19584	-28.7776	2.21641e-111	3.05139e-108	243.611
ENSG00000228401|lncRNA|RP11-251M1.1	-2.01131	0.74865	-28.6316	1.17592e-110	1.48401e-107	241.949
ENSG00000257894|lncRNA|RP1-78O14.1	-2.02261	0.744131	-24.9921	2.1961e-92	9.50223e-90	200.046
ENSG00000267107|lncRNA|PCAT19	-1.73392	1.25737	-22.885	1.06126e-81	2.29595e-79	175.539
ENSG00000256948|lncRNA|RP11-598F7.3	-2.15278	1.01723	-21.462	1.72869e-74	2.46974e-72	158.997
ENSG00000243961|lncRNA|PARAL1	-1.9545	0.853928	-20.1699	5.67758e-68	6.32215e-66	144.051
ENSG00000224397|lncRNA|PELATON	-2.23693	2.43118	-19.2418	2.51231e-63	2.47055e-61	133.396
ENSG00000276850|lncRNA|CH17-360D5.2	-1.70339	0.774988	-18.4718	1.67489e-59	1.35639e-57	124.627
ENSG00000235997|lncRNA|LINC01936	-1.53934	1.02223	-18.376	4.98229e-59	3.90942e-57	123.542
ENSG00000261269|lncRNA|RP11-389C8.2	-1.19751	1.22057	-18.1165	9.4823e-58	7.07389e-56	120.608
ENSG00000231993|lncRNA|EP300-AS1	-1.24072	1.15981	-17.1151	7.42731e-53	4.32612e-51	109.389
ENSG00000236242|lncRNA|MYO16-AS1	-1.73458	0.681075	-16.5141	5.86712e-50	3.05332e-48	102.747
ENSG00000234456|lncRNA|MAGI2-AS3	-1.03913	1.08343	-16.5085	6.24535e-50	3.23903e-48	102.685
ENSG00000267280|lncRNA|TBX2-AS1	-1.19775	0.953895	-16.3975	2.12231e-49	1.05725e-47	101.468
ENSG00000214708|lncRNA|AC090616.2	-1.48999	1.22786	-16.0295	1.20483e-47	5.44654e-46	97.4477
ENSG00000186594|lncRNA|MIR22HG	-1.38259	2.94983	-15.5943	1.36905e-45	5.27555e-44	92.738
ENSG00000255399|lncRNA|TBX5-AS1	-1.18711	1.24187	-15.2535	5.38549e-44	1.87921e-42	89.0844
ENSG00000223914|lncRNA|LINC02471	-1.82343	0.890898	-15.0059	7.60986e-43	2.4416e-41	86.4498
ENSG00000225329|lncRNA|LHFPL3-AS2	-2.29904	1.44807	-14.4075	4.25032e-40	1.13924e-38	80.1586
ENSG00000259153|lncRNA|RP6-65G23.3	1.74223	2.35088	14.2867	1.50409e-39	3.93401e-38	78.9019
ENSG00000273760|lncRNA|CH17-360D5.3	-1.55619	0.764055	-14.2849	1.53244e-39	4.00125e-38	78.8833
ENSG00000228288|lncRNA|PCAT6	1.66956	2.3017	14.2301	2.71465e-39	6.97973e-38	78.3147
ENSG00000227036|lncRNA|LINC00511	1.41208	1.64055	14.0134	2.57704e-38	6.32523e-37	76.077
ENSG00000225342|lncRNA|LRRK2-DT	-2.21056	1.66552	-13.4193	1.13318e-35	2.28507e-34	70.0272
ENSG00000255197|lncRNA|RP11-750H9.5	-1.12038	1.36257	-13.3971	1.4194e-35	2.8358e-34	69.8034
ENSG00000235584|lncRNA|AC008268.1	-2.83561	1.6909	-13.3258	2.92009e-35	5.73566e-34	69.0865
ENSG00000250978|lncRNA|RP11-357D18.1	-1.65369	0.979779	-13.2378	7.09074e-35	1.35072e-33	68.2048
ENSG00000272143|lncRNA|FGF14-AS2	-1.00253	1.02614	-13.0468	4.81747e-34	8.66458e-33	66.301
ENSG00000249859|lncRNA|PVT1	1.24026	1.58012	12.9644	1.09629e-33	1.92825e-32	65.484
ENSG00000237523|lncRNA|LINC00857	1.03331	1.38694	12.8843	2.43295e-33	4.18214e-32	64.6921
ENSG00000273837|lncRNA|LLNLR-470E3.1	-1.06534	1.13713	-12.7846	6.53357e-33	1.079e-31	63.7107
ENSG00000256940|lncRNA|PPP1R14B-AS1	1.35416	1.47307	12.7056	1.42561e-32	2.28702e-31	62.9357
ENSG00000248243|lncRNA|LINC02014	1.0237	1.02622	12.6822	1.79499e-32	2.85839e-31	62.7069
ENSG00000255717|lncRNA|SNHG1	1.30361	3.22497	12.5408	7.19205e-32	1.09464e-30	61.3283
ENSG00000260943|lncRNA|LINC02555	-1.3472	0.703153	-12.5223	8.62414e-32	1.30474e-30	61.148
ENSG00000272666|lncRNA|KLHDC7B-DT	1.72113	2.36896	12.206	1.86195e-30	2.57041e-29	58.0973
ENSG00000259094|lncRNA|RP11-77A13.1	-1.38122	0.551131	-12.0105	1.21735e-29	1.56366e-28	56.2333
ENSG00000225383|lncRNA|SFTA1P	-2.7978	3.85427	-11.6432	3.95087e-28	4.57082e-27	52.7798
ENSG00000272620|lncRNA|AFAP1-AS1	2.62057	2.50012	11.4948	1.58265e-27	1.76104e-26	51.4029
ENSG00000280206|lncRNA|CTB-193M12.5	1.05512	2.83478	11.3109	8.70902e-27	9.1021e-26	49.7113
ENSG00000267530|lncRNA|LINC01836	-1.0577	1.16697	-11.2243	1.93292e-26	1.96589e-25	48.9206
ENSG00000261373|lncRNA|VPS9D1-AS1	1.29673	1.62868	11.0945	6.34206e-26	6.28973e-25	47.7424
ENSG00000265055|lncRNA|AC145343.2	1.08483	1.23943	10.8984	3.75535e-25	3.54558e-24	45.979
ENSG00000243479|lncRNA|MNX1-AS1	1.1508	1.08273	10.8955	3.85305e-25	3.63102e-24	45.9535
ENSG00000258545|lncRNA|RHOXF1-AS1	-1.23458	0.964054	-10.8847	4.24969e-25	3.98497e-24	45.8564
ENSG00000274605|lncRNA|PCCA-DT	1.20425	2.54566	10.84	6.35259e-25	5.8625e-24	45.4579
ENSG00000248890|lncRNA|HHIP-AS1	-1.52169	1.4273	-10.7799	1.08978e-24	9.88245e-24	44.923
ENSG00000265415|lncRNA|CTD-2510F5.4	1.45486	2.36932	10.6896	2.44123e-24	2.15317e-23	44.1236
ENSG00000204949|lncRNA|FAM83A-AS1	1.48435	1.36767	10.6585	3.218e-24	2.80399e-23	43.8499
ENSG00000242125|lncRNA|SNHG3	1.17276	2.80902	10.6096	4.97152e-24	4.24162e-23	43.4188
ENSG00000233461|lncRNA|RP11-295G20.2	1.58219	2.47028	10.3724	4.01077e-23	3.20354e-22	41.3504
ENSG00000267751|lncRNA|BSG-AS1	1.08896	1.6707	10.1102	3.89111e-22	2.91285e-21	39.1001
ENSG00000248801|lncRNA|C8orf34-AS1	-1.61483	1.78862	-9.98145	1.17077e-21	8.3989e-21	38.0096
ENSG00000278910|lncRNA|BANCR	-1.21802	0.775196	-9.76148	7.52105e-21	5.07797e-20	36.1689
ENSG00000251003|lncRNA|ZFPM2-AS1	1.07921	1.01812	9.70192	1.23853e-20	8.20126e-20	35.6753
ENSG00000234614|lncRNA|C2CD4D-AS1	1.36604	3.00682	9.64733	1.9527e-20	1.26917e-19	35.2249
ENSG00000231621|lncRNA|ANKRD44-AS1	-1.41094	1.13835	-9.54612	4.52101e-20	2.8695e-19	34.3946
ENSG00000228723|lncRNA|SRGAP3-AS2	-1.50912	0.900808	-9.49934	6.65012e-20	4.17362e-19	34.0129
ENSG00000263893|lncRNA|CTD-3010D24.3	1.18453	1.11942	9.35382	2.19071e-19	1.32917e-18	32.8342
ENSG00000227066|lncRNA|RP3-340N1.2	1.6528	1.55785	9.19959	7.64119e-19	4.44216e-18	31.5993
ENSG00000273132|lncRNA|RP11-350J20.12	1.62306	2.57708	9.12119	1.43385e-18	8.15709e-18	30.9774
ENSG00000273272|lncRNA|CTA-384D8.34	1.16835	1.46061	9.11764	1.47518e-18	8.37651e-18	30.9493
ENSG00000258844|lncRNA|RP11-259K15.2	-1.41329	1.58705	-9.03572	2.83546e-18	1.57521e-17	30.3038
ENSG00000230838|lncRNA|LINC01614	1.27067	1.41902	9.00941	3.49427e-18	1.92147e-17	30.0974
ENSG00000259342|lncRNA|RP11-519G16.5	1.5885	1.77598	8.81312	1.63838e-17	8.60022e-17	28.5715
ENSG00000259933|lncRNA|RP11-304L19.1	1.27642	1.40997	8.66726	5.08219e-17	2.56806e-16	27.4541
ENSG00000261123|lncRNA|RP11-304L19.3	1.30322	1.43005	8.49849	1.85113e-16	8.93639e-16	26.1787
ENSG00000186493|lncRNA|C5orf38	-1.46586	2.03333	-8.47768	2.16812e-16	1.04004e-15	26.0228
ENSG00000258752|lncRNA|RP11-356K23.1	-1.15118	0.809254	-8.4349	2.9981e-16	1.42152e-15	25.7031
ENSG00000239467|lncRNA|AC007405.6	-1.01233	2.42039	-8.10335	3.54431e-15	1.54327e-14	23.2685
ENSG00000232677|lncRNA|LINC00665	1.06733	1.65293	8.06972	4.53463e-15	1.95704e-14	23.0258
ENSG00000229953|lncRNA|RP11-284F21.7	1.19385	1.31289	7.9374	1.18641e-14	4.9605e-14	22.0786
ENSG00000236345|lncRNA|SCAT8	1.01924	1.06387	7.90445	1.5046e-14	6.23752e-14	21.8447
ENSG00000230316|lncRNA|FEZF1-AS1	1.19683	1.11161	7.84317	2.33611e-14	9.52814e-14	21.4116
ENSG00000272405|lncRNA|RP11-284F21.10	1.40438	1.48569	7.64142	9.7585e-14	3.79115e-13	20.005
ENSG00000259974|lncRNA|LINC00261	-1.20213	1.56011	-7.5367	2.02629e-13	7.65429e-13	19.2866
ENSG00000260265|lncRNA|LINC02562	1.05184	1.5935	7.49456	2.71291e-13	1.01518e-12	18.9998
ENSG00000223392|lncRNA|CLDN10-AS1	1.06501	0.97587	7.39066	5.54063e-13	2.0243e-12	18.2981
ENSG00000249007|lncRNA|RP11-510N19.5	1.07866	1.74768	7.37919	5.9921e-13	2.1845e-12	18.2212
ENSG00000268307|lncRNA|LINC02560	1.16062	1.50973	7.34409	7.61087e-13	2.75081e-12	17.9863
ENSG00000255007|lncRNA|LINC02489	-1.16033	1.53761	-7.15586	2.70261e-12	9.31671e-12	16.7422
ENSG00000260877|lncRNA|RP11-211G23.2	1.03438	0.959197	6.63309	7.947e-11	2.41423e-10	13.4287
ENSG00000249395|lncRNA|CASC9	1.09964	1.04955	6.4264	2.85693e-10	8.28362e-10	12.1775
ENSG00000231106|lncRNA|LINC01436	1.25146	1.92971	5.46014	7.24364e-08	1.69391e-07	6.78795
ENSG00000255026|lncRNA|RP11-326C3.2	1.26892	2.88344	5.34758	1.31438e-07	3.00815e-07	6.21077
ENSG00000229415|lncRNA|SFTA3	-1.07652	4.52693	-4.91901	1.15402e-06	2.41723e-06	4.11297
