# Supplementary material for: Identification of a methyltransferase-related long noncoding RNA signature as a novel prognosis biomarker for lung adenocarcinoma
Source: Aging (Albany NY). 2024 May 20;16(10):8747–71. doi: 10.18632/aging.205837 (PMC11164517; doi:10.18632/aging.205837)
Supplement: Supplementary Table 6 [file aging-16-205837-s005.xlsx]

## Sheet: Sheet1
Supplementary Table 6. The enriched pathways in high- and low-risk groups.
KEGG-high risk group
NAME	SIZE	ES	NES	NOM p-val	FDR q-val	FWER p-val	RANK AT MAX	LEADING EDGE
KEGG_CELL_CYCLE	124	0.791752	2.39274	0	0	0	5149	tags=60%, list=9%, signal=66%
KEGG_SPLICEOSOME	127	0.785391	2.39098	0	0	0	6969	tags=73%, list=13%, signal=84%
KEGG_PYRIMIDINE_METABOLISM	97	0.675346	2.38792	0	0	0	4864	tags=49%, list=9%, signal=54%
KEGG_OOCYTE_MEIOSIS	112	0.638913	2.33541	0	0	0	3582	tags=36%, list=6%, signal=38%
KEGG_RNA_DEGRADATION	59	0.702514	2.26525	0	0	0	8076	tags=64%, list=15%, signal=75%
KEGG_UBIQUITIN_MEDIATED_PROTEOLYSIS	134	0.588657	2.24993	0	0.000297093	0.002	7664	tags=46%, list=14%, signal=54%
KEGG_BASAL_TRANSCRIPTION_FACTORS	35	0.710917	2.24599	0	0.000254651	0.002	7069	tags=54%, list=13%, signal=62%
KEGG_AMINOACYL_TRNA_BIOSYNTHESIS	41	0.788733	2.23993	0	0.00022282	0.002	4226	tags=59%, list=8%, signal=63%
KEGG_PROTEASOME	46	0.87414	2.20517	0	0.00080863	0.006	3082	tags=76%, list=6%, signal=81%
KEGG_NUCLEOTIDE_EXCISION_REPAIR	44	0.733609	2.20463	0	0.000727767	0.006	5710	tags=57%, list=10%, signal=63%
KEGG_HOMOLOGOUS_RECOMBINATION	28	0.872444	2.20313	0	0.000661606	0.006	3561	tags=71%, list=6%, signal=76%
KEGG_CYSTEINE_AND_METHIONINE_METABOLISM	34	0.685095	2.1944	0	0.000606472	0.006	5460	tags=50%, list=10%, signal=55%
KEGG_PURINE_METABOLISM	158	0.524032	2.18557	0	0.000794628	0.008	4864	tags=37%, list=9%, signal=40%
KEGG_MISMATCH_REPAIR	23	0.898016	2.12071	0	0.00107683	0.011	1219	tags=65%, list=2%, signal=67%
KEGG_PROTEIN_EXPORT	24	0.74583	2.11777	0	0.00114633	0.012	9193	tags=67%, list=17%, signal=80%
KEGG_ONE_CARBON_POOL_BY_FOLATE	17	0.774511	2.10175	0	0.00139515	0.016	982	tags=47%, list=2%, signal=48%
KEGG_DNA_REPLICATION	36	0.923881	2.10112	0	0.00131308	0.016	1484	tags=78%, list=3%, signal=80%
KEGG_RNA_POLYMERASE	28	0.701491	2.09436	0	0.00143889	0.017	4614	tags=57%, list=8%, signal=62%
KEGG_PROGESTERONE_MEDIATED_OOCYTE_MATURATION	85	0.564138	2.06011	0.00192308	0.00211895	0.026	5759	tags=35%, list=10%, signal=39%
KEGG_P53_SIGNALING_PATHWAY	68	0.564266	2.05912	0	0.00201301	0.026	6498	tags=41%, list=12%, signal=47%
KEGG_BASE_EXCISION_REPAIR	35	0.732059	2.05392	0	0.00206895	0.026	5140	tags=60%, list=9%, signal=66%
KEGG_PENTOSE_PHOSPHATE_PATHWAY	27	0.689207	2.04418	0.00194175	0.00208097	0.027	3938	tags=44%, list=7%, signal=48%
KEGG_GLYOXYLATE_AND_DICARBOXYLATE_METABOLISM	16	0.780615	2.03376	0.00204499	0.00214615	0.03	1215	tags=44%, list=2%, signal=45%
KEGG_CITRATE_CYCLE_TCA_CYCLE	31	0.708271	1.96729	0	0.004941	0.068	8398	tags=61%, list=15%, signal=72%
KEGG_GLYCOLYSIS_GLUCONEOGENESIS	61	0.551221	1.92335	0	0.00793242	0.101	6784	tags=43%, list=12%, signal=49%
KEGG_N_GLYCAN_BIOSYNTHESIS	46	0.571574	1.91179	0	0.00865841	0.111	4133	tags=43%, list=7%, signal=47%
KEGG_HUNTINGTONS_DISEASE	181	0.53907	1.90849	0	0.00861772	0.113	7419	tags=44%, list=13%, signal=50%
KEGG_LYSINE_DEGRADATION	44	0.556506	1.85841	0.00398406	0.0135789	0.173	6988	tags=45%, list=13%, signal=52%
KEGG_FRUCTOSE_AND_MANNOSE_METABOLISM	33	0.561494	1.83366	0	0.016651	0.206	5313	tags=39%, list=10%, signal=44%
KEGG_PATHOGENIC_ESCHERICHIA_COLI_INFECTION	56	0.527303	1.80394	0.00575816	0.021012	0.257	4641	tags=36%, list=8%, signal=39%
KEGG_BIOSYNTHESIS_OF_UNSATURATED_FATTY_ACIDS	22	0.595395	1.76103	0.00829876	0.0293052	0.336	4622	tags=41%, list=8%, signal=45%
KEGG_ALZHEIMERS_DISEASE	165	0.483828	1.75937	0.0137525	0.0287184	0.34	9928	tags=44%, list=18%, signal=54%
KEGG_GALACTOSE_METABOLISM	25	0.561944	1.74653	0.00994036	0.0313695	0.368	6784	tags=44%, list=12%, signal=50%
KEGG_SELENOAMINO_ACID_METABOLISM	26	0.552859	1.7461	0.00772201	0.0305588	0.368	3894	tags=46%, list=7%, signal=50%
KEGG_SMALL_CELL_LUNG_CANCER	84	0.476736	1.74512	0.00956023	0.0298392	0.368	9823	tags=48%, list=18%, signal=58%
KEGG_NICOTINATE_AND_NICOTINAMIDE_METABOLISM	24	0.511788	1.68458	0.00782779	0.0472798	0.494	6553	tags=33%, list=12%, signal=38%
KEGG_PARKINSONS_DISEASE	129	0.555673	1.67562	0.0377734	0.049137	0.509	9742	tags=52%, list=18%, signal=63%
KEGG_PYRUVATE_METABOLISM	40	0.501339	1.67532	0.0269151	0.0479617	0.51	5894	tags=43%, list=11%, signal=48%
KEGG_BLADDER_CANCER	42	0.458119	1.60194	0.0114504	0.0780606	0.657	7361	tags=38%, list=13%, signal=44%
KEGG_TERPENOID_BACKBONE_BIOSYNTHESIS	15	0.633545	1.58608	0.0407332	0.0848694	0.687	5669	tags=33%, list=10%, signal=37%
KEGG_CHRONIC_MYELOID_LEUKEMIA	73	0.446693	1.58203	0.0357815	0.0849092	0.697	7600	tags=37%, list=14%, signal=43%
KEGG_PANCREATIC_CANCER	70	0.441804	1.57676	0.0326923	0.0851441	0.707	7361	tags=39%, list=13%, signal=44%
KEGG_THYROID_CANCER	29	0.484982	1.57508	0.0438931	0.0840154	0.71	6498	tags=38%, list=12%, signal=43%
KEGG_PATHWAYS_IN_CANCER	325	0.366034	1.53702	0.0344828	0.100318	0.767	7361	tags=30%, list=13%, signal=34%
KEGG_DRUG_METABOLISM_OTHER_ENZYMES	49	0.455057	1.5357	0.0277778	0.0989611	0.767	10041	tags=35%, list=18%, signal=42%
KEGG_RENAL_CELL_CARCINOMA	70	0.422418	1.53047	0.0458167	0.0994963	0.775	7600	tags=37%, list=14%, signal=43%
KEGG_AMYOTROPHIC_LATERAL_SCLEROSIS_ALS	53	0.407262	1.50619	0.0273438	0.109573	0.821	5971	tags=32%, list=11%, signal=36%
KEGG_ALANINE_ASPARTATE_AND_GLUTAMATE_METABOLISM	32	0.438546	1.48748	0.0341365	0.115323	0.845	7203	tags=38%, list=13%, signal=43%
KEGG_INSULIN_SIGNALING_PATHWAY	136	0.345666	1.43278	0.0430528	0.145272	0.902	7600	tags=30%, list=14%, signal=35%
KEGG-low risk group
NAME	SIZE	ES	NES	NOM p-val	FDR q-val	FWER p-val	RANK AT MAX	LEADING EDGE
KEGG_HEMATOPOIETIC_CELL_LINEAGE	85	-0.646908	-2.1024	0	0.0130604	0.017	7733	tags=55%, list=14%, signal=64%
KEGG_ASTHMA	28	-0.826701	-2.07237	0	0.00841075	0.022	7422	tags=79%, list=13%, signal=91%
KEGG_CELL_ADHESION_MOLECULES_CAMS	131	-0.592048	-2.05082	0	0.00826037	0.031	7651	tags=45%, list=14%, signal=52%
KEGG_PRIMARY_BILE_ACID_BIOSYNTHESIS	16	-0.725118	-2.04064	0.0019802	0.00691818	0.033	3723	tags=50%, list=7%, signal=54%
KEGG_AUTOIMMUNE_THYROID_DISEASE	50	-0.689571	-1.98563	0.00192678	0.0129239	0.06	7651	tags=50%, list=14%, signal=58%
KEGG_INTESTINAL_IMMUNE_NETWORK_FOR_IGA_PRODUCTION	46	-0.737105	-1.98185	0.00192308	0.0112862	0.061	7923	tags=67%, list=14%, signal=79%
KEGG_ARACHIDONIC_ACID_METABOLISM	58	-0.561559	-1.97665	0	0.00989937	0.062	8534	tags=48%, list=15%, signal=57%
KEGG_VASCULAR_SMOOTH_MUSCLE_CONTRACTION	115	-0.510291	-1.97508	0	0.00872783	0.062	7398	tags=43%, list=13%, signal=49%
KEGG_LYSOSOME	121	-0.547108	-1.91184	0.00383877	0.0157354	0.11	9161	tags=52%, list=17%, signal=62%
KEGG_COMPLEMENT_AND_COAGULATION_CASCADES	69	-0.572786	-1.87607	0.00392927	0.0226744	0.154	5815	tags=45%, list=11%, signal=50%
KEGG_LEISHMANIA_INFECTION	70	-0.613092	-1.87053	0.00584795	0.0216869	0.157	8022	tags=56%, list=15%, signal=65%
KEGG_LINOLEIC_ACID_METABOLISM	29	-0.596196	-1.85459	0	0.0242063	0.185	13348	tags=59%, list=24%, signal=77%
KEGG_ALDOSTERONE_REGULATED_SODIUM_REABSORPTION	42	-0.553985	-1.84078	0.00390625	0.0258807	0.209	4939	tags=33%, list=9%, signal=37%
KEGG_CYTOKINE_CYTOKINE_RECEPTOR_INTERACTION	264	-0.476102	-1.79749	0.00972763	0.0365462	0.289	7733	tags=34%, list=14%, signal=39%
KEGG_ALLOGRAFT_REJECTION	35	-0.735159	-1.76003	0.011583	0.0483645	0.355	7651	tags=69%, list=14%, signal=80%
KEGG_VIRAL_MYOCARDITIS	68	-0.553519	-1.74021	0.0176471	0.0530201	0.39	7651	tags=49%, list=14%, signal=56%
KEGG_GLYCOSPHINGOLIPID_BIOSYNTHESIS_GANGLIO_SERIES	15	-0.609696	-1.70886	0.0165441	0.0649634	0.459	10509	tags=67%, list=19%, signal=82%
KEGG_LEUKOCYTE_TRANSENDOTHELIAL_MIGRATION	116	-0.470373	-1.68646	0.0120724	0.0728075	0.505	8354	tags=38%, list=15%, signal=45%
KEGG_FC_EPSILON_RI_SIGNALING_PATHWAY	79	-0.452099	-1.68222	0.0123203	0.0711155	0.515	8119	tags=39%, list=15%, signal=46%
KEGG_NEUROACTIVE_LIGAND_RECEPTOR_INTERACTION	270	-0.409841	-1.67796	0	0.0692281	0.521	6201	tags=24%, list=11%, signal=27%
KEGG_DILATED_CARDIOMYOPATHY	90	-0.464448	-1.66511	0.0237154	0.0735023	0.548	10339	tags=44%, list=19%, signal=55%
KEGG_HYPERTROPHIC_CARDIOMYOPATHY_HCM	83	-0.451642	-1.62762	0.0238569	0.0904945	0.618	5683	tags=31%, list=10%, signal=35%
KEGG_GRAFT_VERSUS_HOST_DISEASE	37	-0.661923	-1.62689	0.0446602	0.087243	0.624	1240	tags=38%, list=2%, signal=39%
KEGG_ALPHA_LINOLENIC_ACID_METABOLISM	19	-0.556624	-1.61563	0.018	0.0864567	0.648	13348	tags=68%, list=24%, signal=90%
KEGG_JAK_STAT_SIGNALING_PATHWAY	155	-0.415051	-1.60651	0.0234834	0.0876548	0.664	7756	tags=34%, list=14%, signal=40%
KEGG_ETHER_LIPID_METABOLISM	33	-0.473967	-1.60574	0.0116505	0.084918	0.667	7246	tags=42%, list=13%, signal=49%
KEGG_PPAR_SIGNALING_PATHWAY	69	-0.436853	-1.56548	0.0283976	0.103798	0.743	7069	tags=33%, list=13%, signal=38%
KEGG_CALCIUM_SIGNALING_PATHWAY	178	-0.368026	-1.54847	0.024	0.110117	0.766	8481	tags=32%, list=15%, signal=38%
KEGG_GNRH_SIGNALING_PATHWAY	101	-0.38808	-1.53759	0.0178571	0.1137	0.778	6352	tags=29%, list=11%, signal=32%
KEGG_GLYCOSAMINOGLYCAN_DEGRADATION	21	-0.541281	-1.5363	0.0488281	0.110897	0.779	13964	tags=67%, list=25%, signal=89%
KEGG_DRUG_METABOLISM_CYTOCHROME_P450	69	-0.471033	-1.53512	0.0352941	0.108256	0.781	9667	tags=35%, list=17%, signal=42%
KEGG_LONG_TERM_DEPRESSION	70	-0.363712	-1.43959	0.0284553	0.154649	0.9	5960	tags=30%, list=11%, signal=34%
Hallmark-high risk group
NAME	SIZE	ES	NES	NOM p-val	FDR q-val	FWER p-val	RANK AT MAX	LEADING EDGE
HALLMARK_MTORC1_SIGNALING	200	0.768328	2.53727	0	0	0	5470	tags=66%, list=10%, signal=72%
HALLMARK_GLYCOLYSIS	199	0.644194	2.52428	0	0	0	5460	tags=45%, list=10%, signal=50%
HALLMARK_UNFOLDED_PROTEIN_RESPONSE	113	0.694312	2.42328	0	0	0	8637	tags=63%, list=16%, signal=74%
HALLMARK_G2M_CHECKPOINT	200	0.873555	2.42262	0	0	0	3500	tags=74%, list=6%, signal=79%
HALLMARK_MYC_TARGETS_V1	200	0.869065	2.41963	0	0	0	2964	tags=74%, list=5%, signal=78%
HALLMARK_DNA_REPAIR	149	0.663728	2.36424	0	0.000150538	0.001	4349	tags=45%, list=8%, signal=49%
HALLMARK_E2F_TARGETS	200	0.899117	2.3472	0	0.000258065	0.001	2500	tags=79%, list=5%, signal=82%
HALLMARK_MYC_TARGETS_V2	58	0.866363	2.29351	0	0.000225806	0.001	6211	tags=95%, list=11%, signal=107%
HALLMARK_MITOTIC_SPINDLE	199	0.663234	2.18774	0	0.000385159	0.003	6357	tags=46%, list=12%, signal=51%
HALLMARK_PI3K_AKT_MTOR_SIGNALING	105	0.55418	2.16023	0	0.000346643	0.003	7774	tags=48%, list=14%, signal=55%
HALLMARK_SPERMATOGENESIS	135	0.566605	2.08875	0	0.000900924	0.009	7906	tags=39%, list=14%, signal=46%
HALLMARK_UV_RESPONSE_UP	158	0.479586	2.00096	0	0.00312633	0.029	5949	tags=39%, list=11%, signal=43%
HALLMARK_OXIDATIVE_PHOSPHORYLATION	200	0.636834	1.88223	0.0178926	0.00948659	0.076	7866	tags=55%, list=14%, signal=63%
HALLMARK_ESTROGEN_RESPONSE_LATE	199	0.4034	1.72023	0	0.0324475	0.222	8495	tags=33%, list=15%, signal=38%
HALLMARK_PROTEIN_SECRETION	96	0.488136	1.70164	0.0248447	0.0344456	0.245	10429	tags=49%, list=19%, signal=60%
HALLMARK_REACTIVE_OXYGEN_SPECIES_PATHWAY	49	0.521908	1.66423	0.0289575	0.0404358	0.29	8949	tags=53%, list=16%, signal=63%
HALLMARK_HYPOXIA	200	0.407262	1.58146	0.0281125	0.0630953	0.423	9271	tags=38%, list=17%, signal=45%
HALLMARK_CHOLESTEROL_HOMEOSTASIS	74	0.447717	1.57928	0.0323232	0.0603641	0.427	10566	tags=42%, list=19%, signal=52%
HALLMARK_ANDROGEN_RESPONSE	100	0.408196	1.54984	0.0435685	0.066735	0.467	7375	tags=36%, list=13%, signal=41%
HALLMARK_ADIPOGENESIS	200	0.371654	1.52531	0.0382294	0.0726631	0.508	7356	tags=36%, list=13%, signal=41%
Hallmark-low risk group
NAME	SIZE	ES	NES	NOM p-val	FDR q-val	FWER p-val	RANK AT MAX	LEADING EDGE
HALLMARK_MYOGENESIS	200	-0.480849	-1.87936	0	0.0800669	0.072	8534	tags=40%, list=15%, signal=47%
HALLMARK_COAGULATION	138	-0.479845	-1.75068	0.00847458	0.129862	0.175	6552	tags=33%, list=12%, signal=37%
HALLMARK_KRAS_SIGNALING_UP	200	-0.419337	-1.65893	0.0201613	0.165669	0.29	7561	tags=36%, list=14%, signal=41%
HALLMARK_BILE_ACID_METABOLISM	112	-0.419734	-1.6586	0.0114286	0.124396	0.29	7807	tags=36%, list=14%, signal=42%
HALLMARK_UV_RESPONSE_DN	144	-0.443371	-1.60289	0.0389105	0.117034	0.373	8815	tags=37%, list=16%, signal=44%
HALLMARK_HEME_METABOLISM	200	-0.330066	-1.46655	0.0194175	0.215535	0.565	7274	tags=29%, list=13%, signal=34%
HALLMARK_KRAS_SIGNALING_DN	200	-0.34506	-1.42874	0.020284	0.228014	0.637	8460	tags=29%, list=15%, signal=34%
